# Supplementary material for: Transcriptome Profiles of Strawberry (Fragaria vesca) Fruit Interacting With Botrytis cinerea at Different Ripening Stages
Source: PubMed Central journal article supplement (PMC6759788; doi:10.3389/fpls.2019.01131), 2019-09-18
Supplement: DataSheet_1.pdf [file DataSheet_1.pdf]

## Supplemental Figures

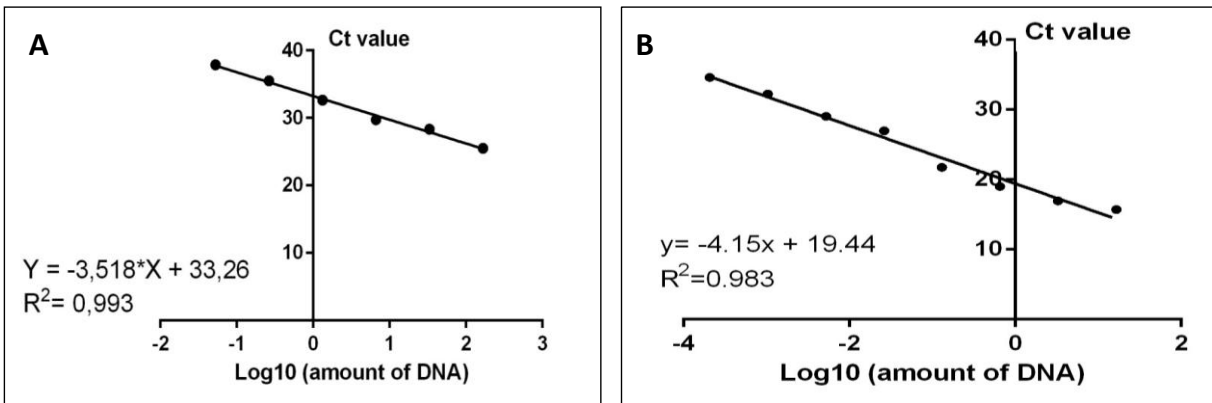

**Supplemental Figure 1.** Standard curves used for *Fragaria vesca* and *Botrytis cinerea* genomic DNA quantification. Curves were generated by amplifying the *EFTwo* (elongation factor 2-like) gene of *F. vesca* (A) and the *Bc3* (ribosomal IGS spacer) gene of *B. cinerea* (B), in a 5-fold serially diluted genomic DNA of *F. vesca* and *B. cinerea*, respectively. The standard curves show good linear relationship ( $R^2 > 0.98$ ) between the  $\log_5$  value of the starting DNA concentration and the threshold cycle (Ct), both in the plant and in the fungus.

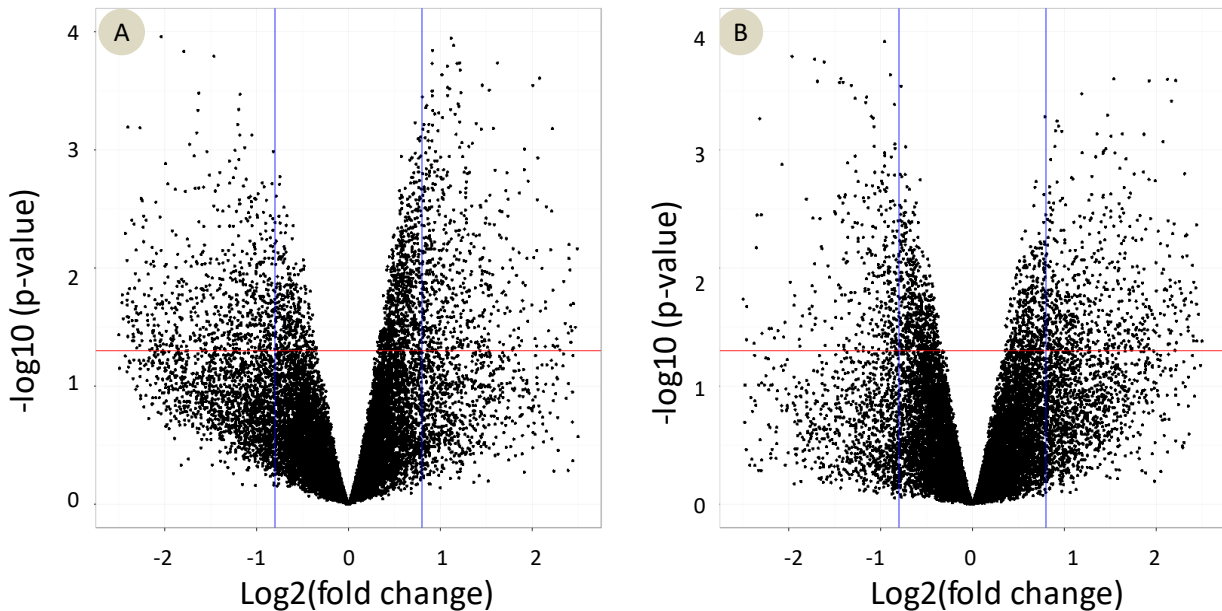

**Supplemental Figure 2.** Volcano plot of *Fragaria vesca* white fruit (A) and red fruit (B) gene expression values at 24 hpi. Genes in the left top rectangle [ $P$ . value  $> -\log_{10}(1,12)$  and fold change  $< \log(2, |-0.80|)$ ] were selected as downregulated; whereas, genes in the right top rectangle [ $P$ . value  $> -\log_{10}(1,12)$  and fold change  $> \log(2, 0.80)$ ].

|                             | Gene ID   | W | R                                           | Description                                               |           | Gene ID   | W                                        | R                                             | Description                     |
|-----------------------------|-----------|---|---------------------------------------------|-----------------------------------------------------------|-----------|-----------|------------------------------------------|-----------------------------------------------|---------------------------------|
| Recogniton & Signaling      | gene29796 |   |                                             | Glutamate receptor                                        |           | gene19766 |                                          |                                               | Alcohol O-fatty-acyltransferase |
|                             | gene17366 |   |                                             | Brefeldin A-inhibited GEP 2                               |           | gene24409 |                                          |                                               | Callose synthase                |
|                             | gene19353 |   |                                             | Brefeldin A-inhibited GEP 2                               |           | gene20547 |                                          |                                               | Cellulose synthase              |
|                             | gene09392 |   |                                             | Calcium-binding protein                                   |           | gene24370 |                                          |                                               | Pectate lyase 1                 |
|                             | gene17154 |   |                                             | Cysteine-rich RLK29                                       |           | gene30789 |                                          |                                               | Polygalacturonase               |
|                             | gene01229 |   |                                             | Disease resistance protein                                |           | gene02468 |                                          |                                               | ABC transporter                 |
|                             | gene13057 |   |                                             | Disease resistance protein                                |           | gene03853 |                                          |                                               | ABC transporter                 |
|                             | gene13684 |   |                                             | Disease resistance protein                                |           | gene15834 |                                          |                                               | ABC transporter                 |
|                             | gene26650 |   |                                             | Disease resistance protein                                |           | gene16257 |                                          |                                               | ABC transporter                 |
|                             | gene32301 |   |                                             | Disease resistance protein                                |           | gene30945 |                                          |                                               | ABC transporter                 |
|                             | gene34124 |   |                                             | Disease resistance protein                                |           | gene01819 |                                          |                                               | Aquaporin NIP5-1                |
|                             | gene24962 |   |                                             | Lectin-domain receptor kinase                             |           | gene19831 |                                          |                                               | Oligopeptide transporter        |
|                             | gene24085 |   |                                             | MAP kinase                                                |           | gene01912 |                                          |                                               | Oligopeptide transporter        |
|                             | gene23086 |   |                                             | PRA1 family protein                                       |           | gene30970 |                                          |                                               | Potassium channel AKT1          |
|                             | gene22229 |   |                                             | Strubbelig-receptor family 2                              |           | gene05930 |                                          |                                               | Protein translocase             |
|                             | gene03058 |   |                                             | TMV resistance protein N                                  |           | gene03413 |                                          |                                               | 60S ribosomal export protein    |
|                             | gene16534 |   |                                             | TMV resistance protein N                                  |           |           |                                          |                                               |                                 |
| gene31994                   |           |   | TMV resistance protein N                    |                                                           |           |           |                                          |                                               |                                 |
| Regulation of transcription | gene19316 |   |                                             | AC9 transposase                                           | gene06433 |           |                                          | 30S ribosomal protein                         |                                 |
|                             | gene05160 |   |                                             | CAM transcription activator                               | gene08941 |           |                                          | 60S ribosome subunit biogenesis protein       |                                 |
|                             | gene13301 |   |                                             | Heat stress transcription factor B-2a                     | gene19176 |           |                                          | Acetylglutamate kinase                        |                                 |
|                             | gene08218 |   |                                             | Histone H1.2                                              | gene29029 |           |                                          | Adenylyl-sulfate kinase                       |                                 |
|                             | gene19196 |   |                                             | Histone-lysine N-methyltransferase                        | gene01867 |           |                                          | ADP,ATP carrier protein                       |                                 |
|                             | gene17538 |   |                                             | RNA polymerase II transcription                           | gene06526 |           |                                          | Ankyrin repeat-containing protein             |                                 |
|                             | gene13280 |   |                                             | Remorin                                                   | gene12868 |           |                                          | Argininosuccinate lyase                       |                                 |
|                             | gene26063 |   |                                             | RPE-spondin                                               | gene34920 |           |                                          | Aspartyl-tRNA synthetase                      |                                 |
|                             | gene23172 |   |                                             | S-acyltransferase                                         | gene10392 |           |                                          | ATECP63                                       |                                 |
|                             | gene13326 |   |                                             | TraB domain-containing protein                            | gene27957 |           |                                          | ATP-dependent RNA helicase                    |                                 |
|                             | gene19128 |   |                                             | Trans. elongation factor B polypeptide3                   | gene32567 |           |                                          | ATP-dependent RNA helicase                    |                                 |
|                             | gene24577 |   |                                             | Transcription factor bHLH95                               | gene28599 |           |                                          | B3 domain-containing protein                  |                                 |
|                             | gene25055 |   |                                             | Translation initiation factor IF-2                        | gene23859 |           |                                          | Coiled-coil domain-containing protein         |                                 |
| gene10484                   |           |   | Two-component response regulator-like APRR2 | gene20880                                                 |           |           | Cytokinin-N-glucosyltransferase          |                                               |                                 |
| RNA processing              | gene29052 |   |                                             | Acylamino-acid-releasing enzyme                           | gene00094 |           |                                          | Cytokinin-O-glucosyltransferase               |                                 |
|                             | gene23651 |   |                                             | Aspartyl aminopeptidase                                   | gene31390 |           |                                          | D-alanyl-D-alanine carboxypeptidase           |                                 |
|                             | gene30538 |   |                                             | Aspartyl aminopeptidase                                   | gene28423 |           |                                          | Diphthamide biosynthesis protein              |                                 |
|                             | gene02138 |   |                                             | E3 ubiquitin-protein ligase MARCH6                        | gene17572 |           |                                          | Dolichol-phosphate mannosyltransferase        |                                 |
|                             | gene16957 |   |                                             | Helicase                                                  | gene15570 |           |                                          | F-box/FBD/LRR-repeat protein                  |                                 |
|                             | gene29251 |   |                                             | Protease Do-like 7                                        | gene28926 |           |                                          | F-box/kelch-repeat protein                    |                                 |
|                             | gene29671 |   |                                             | PTS2 receptor                                             | gene04407 |           |                                          | F-box/LRR-repeat protein                      |                                 |
|                             | gene11969 |   |                                             | Serine/threonine-protein kinase                           | gene24446 |           |                                          | Formin-like protein                           |                                 |
| Lipid met.                  | gene21893 |   |                                             | Tim17                                                     | gene27685 |           |                                          | Formin-like protein                           |                                 |
|                             | gene07498 |   |                                             | Tim23                                                     | gene00561 |           |                                          | Frizzled-3                                    |                                 |
|                             | gene29063 |   |                                             | 3-ketoacyl-CoA synthase                                   | gene14841 |           |                                          | Gibberellin 3-beta-dioxygenase                |                                 |
| Secondary metabolism        | gene18829 |   |                                             | Glycerol-3-phosphate acyltransferase 6                    | gene15604 |           |                                          | Glucose-6-phosphate 1-dehydrogenase           |                                 |
|                             | gene14626 |   |                                             | Palmitoyl-monogalactosyldiacylglycerol delta-7 desaturase | gene24055 |           |                                          | Glutamine amidotransferase                    |                                 |
|                             | gene04355 |   |                                             | Anthocyanidin 5,3-O-glucosyltransferase                   | gene10816 |           |                                          | Golgi resident protein                        |                                 |
|                             | gene04357 |   |                                             | Anthocyanidin 5,3-O-glucosyltransferase                   | gene17395 |           |                                          | Histone deacetylase                           |                                 |
|                             | gene28142 |   |                                             | Cationic peroxidase                                       | gene01761 |           |                                          | Hypothetical protein                          |                                 |
|                             | gene21346 |   |                                             | Chalcone isomerase                                        | gene03688 |           |                                          | Hypothetical protein                          |                                 |
|                             | gene23367 |   |                                             | Chalcone isomerase 1                                      | gene15082 |           |                                          | Hypothetical protein                          |                                 |
|                             | gene26825 |   |                                             | Chalcone synthase                                         | gene24705 |           |                                          | Hypothetical protein                          |                                 |
|                             | gene26826 |   |                                             | Chalcone synthase 2                                       | gene25795 |           |                                          | Hypothetical protein                          |                                 |
|                             | gene25801 |   |                                             | Flavonoid 3'-monooxygenase                                | gene12281 |           |                                          | LM domain-containing protein                  |                                 |
| Defense/Stress              | gene12086 |   |                                             | Laccase                                                   | gene21051 |           |                                          | Lysine-rich arabinogalactan protein           |                                 |
|                             | gene14611 |   |                                             | Naringenin,2-oxoglutarate 3-dioxygenase                   | gene01929 |           |                                          | Lysine-specific demethylase                   |                                 |
|                             | gene09753 |   |                                             | Phenylalanine ammonia-lyase                               | gene00411 |           |                                          | Modification methylase                        |                                 |
|                             | gene08635 |   |                                             | Vinorine synthase                                         | gene23304 |           |                                          | Monoglyceride lipase                          |                                 |
|                             | gene06528 |   |                                             | Beta-galactosidase                                        | gene12793 |           |                                          | Neuroblastoma-amplified sequence              |                                 |
|                             | gene06044 |   |                                             | Cryptochrome-1                                            | gene31584 |           |                                          | Oligogalacturonate-specific porin             |                                 |
|                             | gene00814 |   |                                             | Defensin-like protein 232                                 | gene29012 |           |                                          | Orotidine 5'-phosphate decarboxylase          |                                 |
|                             | gene03043 |   |                                             | Heat shock protein                                        | gene27497 |           |                                          | PH and SEC7 domain-containing protein         |                                 |
|                             | gene09177 |   |                                             | Heat shock protein                                        | gene14205 |           |                                          | PHD and RING finger domain-containing protein |                                 |
|                             | gene13189 |   |                                             | Heat shock protein                                        | gene07883 |           |                                          | Phospholipase C 4                             |                                 |
| gene15418                   |           |   | Heat shock protein                          | gene19207                                                 |           |           | Poly(A) RNA polymerase cid14             |                                               |                                 |
| gene20877                   |           |   | Heat shock protein                          | gene27828                                                 |           |           | Protein HIR1                             |                                               |                                 |
| gene20885                   |           |   | Heat shock protein                          | gene11038                                                 |           |           | Protein RIC1 homolog                     |                                               |                                 |
| gene32258                   |           |   | Heat shock protein                          | gene07903                                                 |           |           | Pyridoxal biosynthesis protein           |                                               |                                 |
| gene07064                   |           |   | Major allergen Pru ar 1                     | gene18342                                                 |           |           | Pyridoxal biosynthesis protein           |                                               |                                 |
| gene28541                   |           |   | MLO-like protein 3                          | gene31671                                                 |           |           | Ribonuclease H protein                   |                                               |                                 |
| gene04330                   |           |   | Pentatricopeptide repeat-containing protein | gene02490                                                 |           |           | Ribosomal protein L11 methyltransferase  |                                               |                                 |
| gene09197                   |           |   | Pentatricopeptide repeat-containing protein | gene01752                                                 |           |           | Sperm protamine-P1                       |                                               |                                 |
| gene13671                   |           |   | Phenylalanyl-tRNA synthetase beta chain     | gene02487                                                 |           |           | Subtilisin-like protease                 |                                               |                                 |
| gene00522                   |           |   | Polygalacturonase inhibitor                 | gene16495                                                 |           |           | Tektin-3                                 |                                               |                                 |
| gene05872                   |           |   | Protease-activating factor 1                | gene18991                                                 |           |           | Transmembrane protein                    |                                               |                                 |
| gene18826                   |           |   | Syntaxin-24                                 | gene26399                                                 |           |           | Transmembrane protein                    |                                               |                                 |
|                             |           |   |                                             | gene16934                                                 |           |           | U4/U6.U5 small nuclear ribonucleoprotein |                                               |                                 |

Supplemental Figure 3. Heat map showing the expression profile of the 149 common genes. Gene description and functional category, based on MapMan annotation, is provided. W, white fruit; R, red fruit. The scale bar displays fold change values ( $\log_2$ ).
