# Supplementary material for: Transcriptome Profiles of Strawberry (Fragaria vesca) Fruit Interacting With Botrytis cinerea at Different Ripening Stages
Source: Front Plant Sci. 2019 Sep 18;10:1131. doi: 10.3389/fpls.2019.01131 (PMC6759788; doi:10.3389/fpls.2019.01131)
Supplement: Supplementary file 3 [file Table_1.xlsx]

## Sheet: S.Table 1
Supplemental Table 1. List of qPCR primers. Gene name, primer name, and primer sequence are listed.
Organism	Gene name/Id	Primer name	Primer sequences (5'-3')
Botrytis cinerea	Bc3	Bc3 F	GCTGTAATTTCAATGTGCAGAATCC
		Bc3 R	GGAGCAACAATTAATCGCATTTC
Fragaria vesca	EF	EF F	TGCTGTTGGAGTCATCAAGAATG
		EF R	TTGGCTGCAGACTTGGTCAC
	gene01896 (Cytochrome P450)	Cyp F	TGACGTGAGCTTCTCTGTGT
		Cyp R	CGACCCAGAAGCTCACCATA
	gene09311 (Transcription factor MYB44)	Myb F	ATAACACAAGCGCCGATCAC
		Myb R	GATGACCTCGGCGTAGTAGT
	gene14626 (Palmitoyl-monogalactosyldiacylglycerol delta-7 desaturase)	Pam F	TTTCCAGCTTCCCAAATGGC
		Pam R	ATGGTACCTGTGTGTGCTCA
	gene13057 (Disease resistance response protein 206)	Drp F	GAGGCACCGGTGATTTCAAG
		Drp R	GTTGCATAGGGAGGCCAGTA
	gene21072 (Glucan endo-1,3-beta-glucosidase 8)	Gbg F	ATGGTGGTGTTGGGTTGTTG
		Gbg R	TGAGCAACTGAACAACCGTG
	gene10423 (Putative apospory-associated protein C)	Aap F	TTGATGCTTCCTAGTGGCCT
		Aap R	GATGGTGTTGGCTTCTTGGG
	gene09493 (Mannose-1-phosphate guanyltransferase alpha)	Map F	GCAGTTTTCCGCTTCCAGAA
		Map R	CCCCAAACTGACTTGCTGAC
	gene30648 (Serine/threonine-protein kinase receptor)	Srk F	ACTGTCTACCCGGCTTTGAA
		Srk R	CCCTTCTCCATTCCCACACT

## Sheet: S. Table 2
	Supplemental Table 2. Summary of reads mapping of the 12 RNA-Seq libraries. W, white fruit; R, red fruit; H, mock inoculated (healthy); I, B. cinerea inoculated; 1-3 indicate the three biological replicates at 24 hours post inoculation.
	Samples	Replicate	Quality-trimmed reads	Uniquely-mapped reads to F. vesca reference	Percentage of uniquely-mapped reads to F. vesca reference	Uniquely-mapped reads to B. cinerea reference	Percentage of uniquely-mapped reads to B. cinerea reference
	WH	1	19175192	13904123	72.511	4306	0.022
		2	12193360	8714291	71.4675	3406	0.028
		3	14516045	10086779	69.4871	6458	0.045
	WI	1	14706293	9219560	62.6913	16905	0.115
		2	10178608	6649280	65.326	9352	0.092
		3	13947656	9977591	71.536	5462	0.039
	RH	1	6086121	4139967	68.0231	2089	0.034
		2	13854723	9877082	71.2904	4375	0.032
		3	19732949	13852129	70.198	4809	0.024
	RI	1	14447738	10259351	71.0101	9280	0.064
		2	13694649	9859106	71.9924	15384	0.112
		3	14160384	9498992	67.0815	561304	3.964

## Sheet: S. Table 3
	Supplemental Table 3. List of genes used to validate the RNA-Seq expression values by qRT-PCR assay. Gene identification, gene description, and fold change from RNA-seq and qRT-PCR are provided.
	Gene ID	Gene description	RNA-seq (Log2 fold change)		qRT-PCR (Log2 fold change)
			White	Red	White	Red
	gene01896	Cytochrome P450	3.3	2.23638	0.52	0.890122
	gene21072	Glucan endo-1,3-beta-glucosidase 8	1.21039	1.4337	0.22048	-1.14
	gene09493	Mannose-1-phosphate guanyltransferase alpha	-1.39896	-1.79461	0.313871	0.307649
	gene10423	Putative apospory-associated protein C	-1.79259	-1.55341	0.925651	0.503092
	gene14626	Palmitoyl-monogalactosyldiacylglycerol delta-7 desaturase	1.71444	1.42898	2.16657	2.10526
	gene13057	Disease resistance response protein 206	1.83828	1.75085	1.53657	1.81762
	gene09311	Transcription factor MYB44	-0.778194	-1.6117	1.38848	1.26947
	gene30648	Serine/threonine-protein kinase receptor	-0.360406	-0.976153	1.3002	1.38391

## Sheet: S. Table 4
	Supplemental Table 4. Expression profile of F. vesca white and red fruits upon B. cinerea infection. Fold change and P-value are presented . hpi, hour post inoculation.
	Gene id	Fold change (log2, B. cinerea- vs mock- inoculated strawberry fruit) at 24 hpi		P.Value
		White	Red	White	Red
		WI/WH	RI/RH	WI/WH	RI/RH
	gene07771		5.06112		0.020329
	gene20877	2.41736	4.46269	0.0314668	0.00310703
	gene17366	-1.77231	4.09898	0.00885067	0.00260687
	gene12793	-2.23351	4.07101	0.00451228	0.00487705
	gene02468	-1.85708	3.91284	0.0180796	0.00214127
	gene07736		3.66746		0.00877789
	gene07767		3.61224		0.00986767
	gene20573		3.56706		0.0490483
	gene21538		3.39868		0.0118389
	gene32359		3.35702		0.0191074
	gene18625		3.31524		0.0036539
	gene22871		3.31096		0.00590374
	gene02469		3.25739		0.00732604
	gene12633		3.21419		0.00731241
	gene21535		3.18714		0.00902344
	gene04407	-2.83626	3.17099	0.0296718	0.020083
	gene28142	2.7665	3.1609	0.0499273	0.0129823
	gene28540		3.13203		0.00236958
	gene31772		3.12938		0.0218068
	gene23436		3.12025		0.00260857
	gene25287		3.07295		0.00976946
	gene05346		3.06744		0.0309551
	gene00422		3.06252		0.00852356
	gene30391		3.04322		0.0472121
	gene17547		3.02549		0.0049006
	gene19353	-1.46039	3.02275	0.040108	0.0126505
	gene02725		3.0002		0.037388
	gene09149		2.95369		0.00983241
	gene30945	-1.57636	2.94368	0.00206583	0.00189905
	gene31324		2.90077		0.00421274
	gene22229	1.54093	2.89944	0.0140123	0.000937193
	gene05142		2.88418		0.011287
	gene31876		2.86431		0.0195964
	gene10629		2.85972		0.0288883
	gene22447		2.85753		0.0220169
	gene35049		2.8221		0.0421339
	gene14708		2.81365		0.0347716
	gene28360		2.80223		0.00540942
	gene12658		2.76562		0.0314368
	gene04330	-1.81506	2.74897	0.0273062	0.00987523
	gene01043		2.74311		0.0312796
	gene16544		2.74232		0.00282105
	gene19176	1.64739	2.73278	0.0424289	0.00234585
	gene22077		2.72794		0.00178613
	gene21872		2.71425		0.0188555
	gene12512		2.71386		0.0322353
	gene06706		2.69881		0.0177482
	gene23435		2.69812		0.00846792
	gene17139		2.68905		0.0139785
	gene07510		2.68085		0.00300026
	gene27892		2.67791		0.0471605
	gene14841	4.26619	2.66618	0.0145849	0.0347287
	gene28617		2.66176		0.00457339
	gene19177		2.63519		0.00175835
	gene01929	-2.20204	2.6243	0.00394365	0.00145775
	gene23175		2.60416		0.0147962
	gene06526	-2.77238	2.59428	0.00801107	0.0203387
	gene04537		2.58474		0.0171724
	gene06412		2.57834		0.0105714
	gene19316	-1.61496	2.55281	0.0410234	0.0247097
	gene23824		2.54387		0.0208245
	gene18713		2.52579		0.0344808
	gene16623		2.51808		0.0333913
	gene05105		2.50713		0.0114421
	gene29943		2.50243		0.0233121
	gene23437		2.49699		0.0416211
	gene28107		2.46086		0.0246449
	gene03685		2.44228		0.0415719
	gene24440		2.43891		0.00430802
	gene14850		2.43795		0.0201627
	gene28752		2.43133		0.0147128
	gene04472		2.41031		0.0131662
	gene19246		2.40635		0.0412999
	gene03058	-2.60496	2.40073	0.0252996	0.0376995
	gene05620		2.39316		0.00948416
	gene29330		2.38222		0.0194618
	gene24962	1.25744	2.37282	0.0407832	0.0162174
	gene34533		2.35565		0.0255138
	gene13326	-2.17442	2.34759	0.0171851	0.0341305
	gene18254		2.34757		0.0316548
	gene14188		2.33436		0.00785855
	gene02308		2.33427		0.02718
	gene24409	-2.09558	2.33157	0.00276967	0.00522078
	gene00894		2.32159		0.0181593
	gene16326		2.31869		0.00535056
	gene18829	1.24913	2.30703	0.0229677	0.00159515
	gene25628		2.30686		0.0206211
	gene08049		2.30341		0.0189146
	gene28451		2.28856		0.00808416
	gene25994		2.27515		0.0163382
	gene32567	-2.38226	2.26665	0.0149912	0.0231056
	gene14811		2.26649		0.0364303
	gene30004		2.26196		0.0149465
	gene09114		2.25223		0.0129942
	gene32514		2.22014		0.028092
	gene24966		2.21993		0.0428917
	gene03099		2.21391		0.000258638
	gene29796	2.36124	2.20902	0.0294567	0.0215089
	gene03445		2.20796		0.0133617
	gene27311		2.20666		0.0498558
	gene10425		2.20501		0.0242264
	gene14632		2.20391		0.0498914
	gene05872	-1.1427	2.19677	0.0188216	0.00423321
	gene06854		2.18212		0.0204809
	gene16957	-1.12446	2.17705	0.0394311	0.00512636
	gene18599		2.16839		0.0172796
	gene14626	1.71444	2.16657	0.00222001	0.000385022
	gene24988		2.16567		0.0341513
	gene32302		2.15466		0.0143867
	gene05795		2.15368		0.035733
	gene28556		2.15184		0.0185243
	gene08791		2.15063		0.0125979
	gene30638		2.14558		0.00791385
	gene32277		2.14299		0.0438962
	gene15657		2.13639		0.033266
	gene31183		2.12907		0.00397814
	gene07465		2.12718		0.0442769
	gene07078		2.12673		0.0210767
	gene20547	1.20087	2.12313	0.00850225	0.000252236
	gene28018		2.12189		0.00645414
	gene15638		2.1159		0.0153563
	gene24055	1.86221	2.09365	0.0455192	0.0150461
	gene32117		2.08844		0.0250007
	gene02487	2.4487	2.08618	0.0199886	0.0191207
	gene02099		2.0858		0.0153017
	gene24815		2.07999		0.0102407
	gene34116		2.0742		0.000850838
	gene28423	-1.16182	2.06359	0.0412529	0.0110912
	gene21249		2.04537		0.0242373
	gene12086	1.58705	2.04497	0.00429108	0.00624066
	gene09920		2.03483		0.0376822
	gene31861		2.02038		0.00488968
	gene27957	-1.73334	2.00835	0.00649273	0.0305557
	gene31768		2.00185		0.0156142
	gene03259		1.99628		0.00900748
	gene00543		1.99328		0.0351862
	gene20885	1.13818	1.98994	0.0467501	0.0018208
	gene20308		1.98179		0.0266998
	gene08620		1.96922		0.0337221
	gene24401		1.95844		0.024774
	gene13660		1.95729		0.0246432
	gene34123		1.94479		0.0227891
	gene09377		1.93912		0.00381984
	gene30565		1.92688		0.0219763
	gene08892		1.92497		0.0483381
	gene00094	1.59688	1.92395	0.0014827	0.000260734
	gene13265		1.92194		0.0211987
	gene13671	-1.25256	1.92087	0.00443273	0.00177853
	gene13096		1.91727		0.0396906
	gene13606		1.90935		0.026031
	gene30620		1.90739		0.0443598
	gene34051		1.90447		0.0336
	gene25844		1.89899		0.02491
	gene00926		1.89447		0.0185553
	gene01288		1.89315		0.0462334
	gene17503		1.88673		0.00469266
	gene05930	-1.2495	1.88217	0.0483097	0.0212741
	gene32620		1.87622		0.0281238
	gene17154	-4.42688	1.87416	0.000185215	0.0360944
	gene10369		1.87078		0.0327502
	gene11530		1.86971		0.0476444
	gene14806		1.86799		0.000737136
	gene20590		1.86682		0.0101969
	gene01602		1.86014		0.00153601
	gene09197	-1.19525	1.85877	0.0234684	0.0201472
	gene28489		1.85434		0.0265716
	gene27497	-1.57745	1.85418	0.0168636	0.0298804
	gene17538	-1.90638	1.85347	0.037715	0.0166049
	gene12609		1.85148		0.013378
	gene19264		1.84617		0.0406619
	gene09140		1.84499		0.0337485
	gene31994	-1.96519	1.84269	0.00193752	0.00571147
	gene06433	-1.98093	1.82887	0.0186757	0.0440923
	gene05053		1.82829		0.0292855
	gene31671	1.48199	1.82388	0.0107143	0.00358963
	gene24089		1.81581		0.0335592
	gene03413	2.49022	1.81228	0.00688201	0.0109587
	gene30753		1.8111		0.0421542
	gene26738		1.81075		0.0465079
	gene15418	1.82979	1.80529	0.0115193	0.0142917
	gene17000		1.79508		0.00970136
	gene17430		1.7945		0.00392866
	gene10156		1.79326		0.0393349
	gene25036		1.79151		0.0217921
	gene14634		1.78802		0.0320137
	gene04473		1.78491		0.0367787
	gene24705	-2.03362	1.78067	0.0170683	0.0191654
	gene28729		1.77766		0.0332233
	gene27357		1.77755		0.00583241
	gene08776		1.77161		0.0131145
	gene18440		1.77061		0.0130195
	gene09386		1.76268		0.00159873
	gene31405		1.7562		0.0377859
	gene01038		1.75411		0.0156575
	gene22908		1.7486		0.0299892
	gene32586		1.74595		0.0146092
	gene00522	1.7968	1.74571	0.0474824	0.00556833
	gene23900		1.74151		3.04992e-05
	gene01965		1.74056		0.00980742
	gene25080		1.74009		0.0366634
	gene00799		1.73889		0.0482932
	gene06080		1.72879		0.0260238
	gene31974		1.72773		0.0494879
	gene09753	1.53516	1.72222	0.00422854	0.00233104
	gene12281	-1.57088	1.71739	0.0381732	0.0462469
	gene24713		1.7141		0.00445254
	gene15978		1.71407		0.0164325
	gene31737		1.71374		0.0153364
	gene20514		1.70846		0.0187182
	gene23844		1.70638		0.00252319
	gene24446	-1.65475	1.70506	0.00882638	0.0166845
	gene34220		1.70398		0.0152577
	gene31609		1.70141		0.0416533
	gene26593		1.70049		0.0333395
	gene21324		1.69675		0.0357221
	gene25303		1.69486		0.0346062
	gene31932		1.69151		0.0333087
	gene01735		1.68856		0.0241489
	gene10667		1.67294		0.04492
	gene02073		1.67		0.00118954
	gene30789	-1.26186	1.66403	0.0063346	0.00547439
	gene01037		1.66352		0.00750091
	gene20347		1.66322		0.0277446
	gene30332		1.66071		0.0471158
	gene04247		1.65822		0.0338014
	gene32347		1.65554		0.00826933
	gene08915		1.655		0.0124083
	gene25222		1.65484		0.0281124
	gene27438		1.65197		0.0020837
	gene17340		1.64907		0.0414061
	gene30343		1.64706		0.00341964
	gene15073		1.64472		0.00585409
	gene09619		1.632		0.000728999
	gene17231		1.63161		0.0266805
	gene29251	-1.0457	1.63003	0.0145674	0.00315401
	gene08635	3.46586	1.6263	0.00579865	0.0191257
	gene30820		1.62279		0.0431805
	gene04206		1.62211		0.00619914
	gene04840		1.6185		0.0149192
	gene27732		1.61698		0.00402371
	gene07513		1.60699		0.0306474
	gene29814		1.60697		0.00759304
	gene12184		1.60687		0.0362604
	gene24577	1.20299	1.60628	0.00481289	0.00143407
	gene01669		1.603		0.00368035
	gene25668		1.6008		0.0296198
	gene05160	-1.29659	1.59668	0.0173928	0.0192214
	gene28231		1.59585		0.0028477
	gene23176		1.59469		0.0100945
	gene17869		1.59227		0.0461815
	gene12881		1.59091		0.0221819
	gene03105		1.58991		0.00534499
	gene17015		1.58812		9.72969e-05
	gene04218		1.58779		0.0357609
	gene02215		1.58735		0.0105447
	gene28314		1.58677		0.0475858
	gene20575		1.58649		0.0135718
	gene00485		1.58592		0.0314864
	gene12805		1.58279		0.00886536
	gene15176		1.57733		0.0304461
	gene16240		1.57614		0.0128865
	gene15754		1.55555		0.0328989
	gene04357	1.19874	1.55124	0.00522904	0.00106188
	gene26534		1.54915		0.0099467
	gene20754		1.5483		0.043842
	gene17557		1.53864		0.0390367
	gene34200		1.53784		0.0474041
	gene13057	1.83828	1.53657	3.86256e-05	0.000250454
	gene31664		1.53601		0.00441469
	gene13602		1.53335		0.0444998
	gene07064	2.52369	1.53119	0.00352985	0.0152095
	gene27382		1.52698		0.0375382
	gene24524		1.52373		0.044315
	gene20267		1.52114		0.00889923
	gene15604	-0.921465	1.51799	0.0499113	0.0456097
	gene22773		1.50988		0.0231813
	gene29225		1.50912		0.000763163
	gene29063	1.10881	1.50575	0.00950212	0.00236023
	gene19196	-1.11204	1.50566	0.0163718	0.00330048
	gene15723		1.50542		0.0285198
	gene27697		1.5026		0.00372709
	gene19299		1.49311		0.0406994
	gene20183		1.49309		0.00915746
	gene26467		1.49224		0.0174643
	gene15183		1.49209		0.0251243
	gene30283		1.4813		0.0369926
	gene24402		1.48083		0.0458125
	gene26650	-1.33473	1.478	0.0162552	0.0300869
	gene32301	2.78449	1.47157	0.000667213	0.0285007
	gene23367	1.34738	1.47121	0.000882241	0.000508837
	gene17672		1.47001		0.0478712
	gene19020		1.46848		0.0152604
	gene01819	0.966108	1.46632	0.043377	0.0247578
	gene18138		1.46608		0.0436424
	gene15221		1.46303		0.00998832
	gene16257	0.865651	1.45471	0.0188019	0.00307019
	gene01471		1.45323		0.0495322
	gene26826	1.27939	1.45239	0.00210348	0.00097921
	gene29744		1.45214		0.0133372
	gene30388		1.44924		0.00450266
	gene17765		1.44902		0.0348957
	gene34056		1.44636		0.04457
	gene08194		1.44562		0.015253
	gene30524		1.44089		0.00576791
	gene14015		1.43791		0.0324061
	gene20611		1.43689		0.0478071
	gene26782		1.43316		0.00353722
	gene14199		1.43252		0.0145742
	gene24102		1.42828		0.00102606
	gene19024		1.42554		0.0024164
	gene31390	-1.21482	1.42086	0.0205421	0.00825139
	gene18991	-0.834477	1.42067	0.00924423	0.00106873
	gene30970	1.67055	1.42032	0.00333823	0.00251875
	gene09706		1.41776		0.0229678
	gene26825	1.53516	1.40554	0.0086766	0.0168743
	gene12641		1.40473		0.00689525
	gene10403		1.40093		0.00404756
	gene25112		1.3901		0.00606548
	gene04477		1.38818		0.0114487
	gene22219		1.38784		0.0188546
	gene30033		1.38347		0.0500116
	gene21230		1.38205		0.0344438
	gene14205	2.48345	1.37892	9.54912e-05	0.00888909
	gene27828	-1.15637	1.37747	0.00722326	0.00500041
	gene31681		1.37651		0.022746
	gene31164		1.37034		0.0258865
	gene17608		1.36794		0.013066
	gene09820		1.36777		0.00711697
	gene21408		1.36695		0.0336828
	gene15204		1.3628		0.0415967
	gene31961		1.35676		0.030478
	gene30167		1.35436		0.000730338
	gene15134		1.3536		0.014591
	gene20880	-0.85811	1.34679	0.037441	0.00849082
	gene06044	1.69034	1.34479	0.0157832	0.0291832
	gene17625		1.34108		0.0181195
	gene07883	1.14517	1.34018	0.00321308	0.00114453
	gene23199		1.33914		0.0438244
	gene34920	-0.877097	1.33699	0.0345809	0.00887535
	gene23008		1.33116		0.0201427
	gene08691		1.32438		0.00754034
	gene04355	1.73678	1.3208	0.003628	0.0194988
	gene11311		1.31523		0.0425129
	gene30262		1.31214		0.00344073
	gene14851		1.30583		0.0115993
	gene15996		1.30287		0.0283968
	gene10637		1.30237		0.00809897
	gene30648		1.3002		0.00167708
	gene16256		1.29673		0.00237916
	gene24532		1.29405		0.0331118
	gene19260		1.29099		0.0351332
	gene01635		1.29089		0.0237055
	gene12224		1.29038		0.00379117
	gene27368		1.28538		0.0191127
	gene28163		1.27997		0.00392564
	gene03654		1.27926		0.0472853
	gene21480		1.27597		0.013415
	gene24888		1.27493		0.0209385
	gene20309		1.27397		0.00518716
	gene30351		1.27207		0.0471582
	gene34749		1.27089		0.0246574
	gene12671		1.26868		0.049976
	gene12577		1.26849		0.019192
	gene07438		1.26681		0.00266118
	gene08674		1.26509		0.0336194
	gene28708		1.26405		0.0356475
	gene24085	1.75695	1.26323	0.0232592	0.0416365
	gene12537		1.25913		0.0128413
	gene15834	-1.07872	1.25728	0.00914868	0.0132058
	gene25735		1.2567		0.040699
	gene23883		1.25648		0.0364848
	gene03518		1.25575		0.0182349
	gene32578		1.25396		0.045175
	gene00817		1.25069		0.0295909
	gene22074		1.24409		0.00990256
	gene28833		1.24058		0.0125779
	gene12105		1.23168		0.0468221
	gene02138	-1.25224	1.22403	0.0107416	0.0231813
	gene16447		1.21974		0.0247451
	gene28393		1.21889		0.0171973
	gene12932		1.21858		0.0110311
	gene31536		1.21777		0.00374138
	gene09662		1.21563		0.0139255
	gene20484		1.21546		0.00853777
	gene13896		1.21444		0.0106636
	gene26562		1.21001		0.0351689
	gene21308		1.20857		0.0201881
	gene19128	-1.07849	1.19685	0.0406247	0.0323284
	gene32452		1.19672		0.00670059
	gene30394		1.19594		0.00105867
	gene28599	-1.27021	1.19533	0.0328086	0.0301758
	gene05696		1.19509		0.0303102
	gene19207	-0.962546	1.19452	0.0464621	0.0397627
	gene17265		1.19438		0.00605324
	gene04541		1.1901		0.035814
	gene04517		1.18948		0.000335233
	gene17003		1.18924		0.00853732
	gene10955		1.1879		0.0488749
	gene21426		1.18592		0.02004
	gene08660		1.1811		0.0426486
	gene19067		1.18091		0.0406762
	gene23103		1.17857		0.00447893
	gene08375		1.17368		0.0194196
	gene02400		1.17347		0.0401843
	gene05183		1.1729		0.0167982
	gene08354		1.17251		0.0358742
	gene30225		1.17018		0.00363324
	gene19766	1.87494	1.16932	0.0232586	0.0171492
	gene17634		1.16689		0.0479981
	gene25801	1.15053	1.15705	0.0040417	0.0114102
	gene29029	0.984017	1.15508	0.0336462	0.014255
	gene14611	1.28746	1.15502	0.0193364	0.0371027
	gene03020		1.15316		0.0283376
	gene28361		1.15115		0.0147609
	gene06528	-1.00142	1.15025	0.0146523	0.0286524
	gene19111		1.14765		0.0113908
	gene25023		1.14289		0.0266598
	gene31674		1.1419		0.0453927
	gene24687		1.13904		0.0173997
	gene26547		1.13827		0.00798849
	gene30932		1.13689		0.0221414
	gene10015		1.13523		0.0424566
	gene16534	-1.00863	1.13195	0.0106996	0.0256555
	gene16700		1.13137		0.00799332
	gene11969	-1.02546	1.12888	0.015705	0.0464146
	gene10396		1.12355		0.031533
	gene08856		1.12083		0.025955
	gene14276		1.11986		0.0070808
	gene21129		1.11665		0.0358499
	gene01893		1.11624		0.00832937
	gene21684		1.11549		0.020133
	gene22505		1.11538		0.0115197
	gene18904		1.11434		0.0284946
	gene11038	-0.902788	1.11323	0.019539	0.0126994
	gene19272		1.11208		0.0426968
	gene00224		1.10877		0.0421382
	gene29924		1.10846		0.0168303
	gene02234		1.10667		0.041098
	gene16495	-1.22044	1.10533	0.0186048	0.0259383
	gene20040		1.10491		0.00409168
	gene20914		1.10027		0.0307369
	gene12830		1.09998		0.00884415
	gene16214		1.09887		0.0447106
	gene13555		1.09807		0.0277478
	gene20276		1.09603		0.0121403
	gene27424		1.09378		0.0245474
	gene02203		1.09226		0.0017711
	gene06705		1.09138		0.0469424
	gene01912	2.06021	1.0893	0.00116687	0.025921
	gene10999		1.08852		0.0318728
	gene21679		1.08647		0.00924721
	gene09560		1.08629		0.0405069
	gene03846		1.08595		0.0477447
	gene04283		1.08311		0.0175882
	gene01628		1.0772		0.00171683
	gene24449		1.07716		0.0442781
	gene29012	-1.17598	1.07674	0.0239234	0.0300545
	gene08719		1.07203		0.0399225
	gene26473		1.07158		0.0275145
	gene26222		1.0713		0.0289583
	gene34611		1.0708		0.0247356
	gene20992		1.06263		0.0330478
	gene08632		1.05952		0.00715316
	gene02466		1.05745		0.0250631
	gene24555		1.05604		0.0379365
	gene18305		1.05455		0.0187134
	gene23651	-1.03548	1.05265	0.0301875	0.0293994
	gene27049		1.05085		0.0427775
	gene16208		1.04751		0.0166898
	gene10484	-0.809253	1.0466	0.0227162	0.0174914
	gene15481		1.04441		0.0341892
	gene15440		1.04434		0.0230699
	gene27362		1.04364		0.0101795
	gene11302		1.03923		0.0412421
	gene23498		1.03796		0.0233006
	gene15924		1.03681		0.0492618
	gene23846		1.03275		0.0195143
	gene16762		1.03253		0.0438701
	gene15641		1.03067		0.0138077
	gene23850		1.0296		0.0300592
	gene25803		1.02887		0.0195914
	gene19831	1.06511	1.0287	0.0121934	0.016061
	gene10646		1.02411		0.0395515
	gene23675		1.02312		0.0260131
	gene25738		1.02262		0.0282973
	gene26519		1.0222		0.0479962
	gene13479		1.02042		0.0316028
	gene01867	-1.22455	1.01893	0.0105309	0.035344
	gene31817		1.015		0.026078
	gene07488		1.01359		0.00292297
	gene16334		1.01251		0.017523
	gene24813		1.01015		0.0485082
	gene12700		1.00943		0.0187112
	gene31543		1.00861		0.0268264
	gene04287		1.00763		0.0308609
	gene14534		1.00674		0.0249458
	gene02393		1.00642		0.0273175
	gene08925		1.00635		0.00613313
	gene03853	1.31173	1.00407	0.000938333	0.00578743
	gene20085		1.00115		0.0096726
	gene12556		0.995894		0.0271797
	gene27007		0.994779		0.00477997
	gene21219		0.987667		0.0329585
	gene16584		0.982794		0.0464086
	gene17149		0.98203		0.0125658
	gene19099		0.980868		0.00257087
	gene08120		0.974358		0.000695356
	gene03233		0.971905		0.00734781
	gene34124	-0.941708	0.971607	0.00566406	0.0254736
	gene25798		0.969674		0.0200232
	gene10717		0.968808		0.0466263
	gene24904		0.965728		0.0357385
	gene25795	-0.953135	0.964285	0.0181964	0.0183122
	gene23476		0.964188		0.0453987
	gene22566		0.9637		0.00482873
	gene06121		0.962059		0.0480662
	gene28330		0.958134		0.00268535
	gene20954		0.958094		0.0285034
	gene24561		0.957348		0.0397688
	gene00379		0.95441		0.0265584
	gene04192		0.953996		0.0180769
	gene08201		0.953007		0.025089
	gene16707		0.951879		0.0244773
	gene27685	-1.22139	0.949255	0.0168481	0.0453762
	gene12868	-1.36666	0.948875	0.00330374	0.0171503
	gene25491		0.947995		0.0402664
	gene26746		0.946341		0.0243431
	gene12792		0.946109		0.0230935
	gene11129		0.944794		0.0441723
	gene33936		0.944148		0.0491584
	gene22762		0.94182		0.0170724
	gene20610		0.939719		0.0415584
	gene11912		0.936561		0.000626784
	gene16444		0.936118		0.0131307
	gene21346	1.20965	0.935479	0.0110494	0.0441322
	gene13812		0.935142		0.0249356
	gene08809		0.931103		0.0158373
	gene13771		0.930643		0.0494874
	gene02155		0.927744		0.0456667
	gene28813		0.925806		0.0333138
	gene34321		0.925648		0.0164484
	gene26647		0.925072		0.016981
	gene10103		0.924314		0.0330462
	gene03712		0.924043		0.0170685
	gene01118		0.923461		0.021872
	gene31440		0.922058		0.00187293
	gene10311		0.921007		0.00600008
	gene24370	0.938298	0.920988	0.030885	0.0340713
	gene00608		0.919884		0.000569613
	gene09027		0.91977		0.0092734
	gene22223		0.91928		0.0392637
	gene13684	0.945083	0.918371	0.049179	0.0448286
	gene23495		0.916583		0.0146493
	gene18025		0.916253		0.0137634
	gene24158		0.913761		0.0190077
	gene27852		0.913364		0.0208703
	gene01229	-0.922729	0.912984	0.0112413	0.025549
	gene26511		0.912891		0.0442405
	gene08208		0.911982		0.0314361
	gene32049		0.909492		0.026456
	gene27507		0.908649		0.0285885
	gene29149		0.906118		0.0353242
	gene04212		0.905397		0.0220418
	gene12097		0.904831		0.0186325
	gene25847		0.904292		0.00583694
	gene12066		0.903693		0.0290608
	gene02490	1.29387	0.903175	2.53824e-05	0.00068892
	gene20178		0.90243		0.0438616
	gene03665		0.901705		0.0429713
	gene12411		0.900121		0.0500506
	gene14415		0.897358		0.0288508
	gene19721		0.897201		0.0115457
	gene01234		0.895419		0.000936691
	gene16413		0.890605		0.0204952
	gene16867		0.890211		0.0411083
	gene02475		0.88912		0.00567463
	gene18000		0.88742		0.0238299
	gene10130		0.885803		0.0470268
	gene20979		0.884964		0.0419945
	gene19578		0.883482		0.00281582
	gene01345		0.882543		0.0364296
	gene28313		0.881606		0.0116539
	gene15471		0.880731		0.0227162
	gene05506		0.87759		0.0106416
	gene14587		0.876817		0.0490897
	gene15353		0.874752		0.0128669
	gene17137		0.87446		0.0297272
	gene09433		0.872969		0.0375265
	gene23065		0.872245		0.00321293
	gene15909		0.869251		0.00411306
	gene07882		0.868799		0.0156039
	gene11046		0.868687		0.0288301
	gene24358		0.86623		0.0218752
	gene24754		0.865555		0.0197806
	gene15974		0.865075		0.0120674
	gene15570	-0.87299	0.861495	0.0320547	0.0474649
	gene17224		0.861411		0.0474566
	gene26714		0.858565		0.0152721
	gene09749		0.857755		0.0349742
	gene06632		0.857058		0.0485738
	gene22889		0.855941		0.00353836
	gene31845		0.854379		0.0165901
	gene22519		0.853518		0.0445138
	gene22539		0.852469		0.00120279
	gene30367		0.852079		0.00884678
	gene05678		0.851344		0.0475204
	gene01338		0.850699		0.00308716
	gene23733		0.850204		0.0269207
	gene22513		0.849646		0.034177
	gene25097		0.845311		0.0454943
	gene24265		0.844297		0.00231207
	gene09167		0.844261		0.0212219
	gene11048		0.843314		0.00400265
	gene19317		0.841375		0.0364706
	gene30014		0.841025		0.00475717
	gene09402		0.840927		0.0405633
	gene15062		0.839777		0.0172468
	gene26503		0.838946		0.0350579
	gene13865		0.83759		0.00205245
	gene24411		0.837191		0.00981026
	gene24114		0.835729		0.0264463
	gene23172	-1.62726	0.835015	0.000330417	0.0272832
	gene24460		0.833815		0.0393694
	gene01668		0.831445		0.00279055
	gene30538	-0.917686	0.829232	0.0295657	0.0474594
	gene16674		0.828632		0.0436703
	gene07876		0.828143		0.0339194
	gene12035		0.826785		0.0153498
	gene15618		0.82576		0.02495
	gene29052	-0.849917	0.825436	0.00360778	0.00552088
	gene24070		0.823959		0.0095518
	gene07782		0.823729		0.0433686
	gene13920		0.819978		0.0480336
	gene13830		0.819616		0.0456393
	gene12821		0.819418		0.00641973
	gene26642		0.81897		0.0284696
	gene01740		0.817426		0.0188291
	gene18113		0.815212		0.0164963
	gene28541	0.897529	0.814838	0.0201366	0.0298707
	gene13121		0.8145		0.00385654
	gene30942		0.813637		0.0204359
	gene24834		0.812253		0.0275915
	gene11981		0.810203		0.00760657
	gene22430		0.804267		0.0163302
	gene26090		0.802617		0.0318041
	gene31121		0.802211		0.00784184
	gene10588		0.801614		0.01758
	gene05368		0.800107		0.0178784
	gene22981		0.800032		0.0370258
	gene22028		-0.801702		0.00764663
	gene16494		-0.802357		0.00792159
	gene30900		-0.80264		0.025718
	gene15180		-0.803128		0.043722
	gene32263		-0.806238		0.00889653
	gene10794		-0.807979		0.017376
	gene17617		-0.808876		0.00397749
	gene26014		-0.811657		0.0138926
	gene03408		-0.815391		0.0126632
	gene19739		-0.819328		0.0314527
	gene26399	0.868993	-0.82027	0.0112817	0.00982528
	gene17335		-0.821016		0.00485318
	gene08977		-0.821386		0.0436737
	gene20721		-0.82254		0.0276532
	gene26286		-0.824005		0.0125718
	gene21330		-0.827621		0.0221557
	gene12462		-0.828679		0.0405968
	gene32470		-0.829061		0.036274
	gene25055	0.902284	-0.829453	0.0252122	0.041672
	gene21968		-0.829868		0.0199624
	gene21883		-0.83009		0.00848097
	gene11577		-0.831545		0.0390498
	gene04306		-0.83363		0.0481724
	gene18780		-0.835086		0.0405825
	gene12457		-0.835265		0.0111232
	gene17433		-0.837666		0.00551935
	gene16934	0.846967	-0.840172	0.00144184	0.000970581
	gene28185		-0.840437		0.0376255
	gene11089		-0.841168		0.0419172
	gene14356		-0.842174		0.0156425
	gene08904		-0.845359		0.000895591
	gene09141		-0.84584		0.00292639
	gene08088		-0.846478		0.0267834
	gene14950		-0.847158		0.00163477
	gene17817		-0.847671		0.000413133
	gene11427		-0.847752		0.00538934
	gene26063	-0.903645	-0.850264	0.0328818	0.0148747
	gene06362		-0.850342		0.0167161
	gene25742		-0.851487		0.0108286
	gene08275		-0.851621		0.0461476
	gene13227		-0.852398		0.0426326
	gene09413		-0.854897		0.0268744
	gene15170		-0.855507		0.00407255
	gene24996		-0.856543		0.032935
	gene23137		-0.85663		0.0232405
	gene18775		-0.856921		0.042606
	gene30609		-0.859285		0.00785664
	gene00835		-0.861722		0.0266367
	gene30528		-0.861943		0.0334698
	gene18694		-0.865191		0.00613028
	gene11461		-0.867445		0.0345019
	gene26171		-0.867814		0.00270751
	gene28081		-0.869671		0.00487019
	gene17766		-0.872549		0.0189968
	gene21644		-0.874749		0.0151944
	gene21627		-0.874853		0.0164442
	gene17157		-0.874976		0.0301145
	gene20446		-0.875592		0.0399943
	gene23005		-0.877415		0.0406168
	gene22275		-0.877733		0.0335888
	gene30245		-0.880773		0.0399942
	gene06517		-0.880994		0.00114777
	gene15452		-0.881608		0.0184758
	gene08780		-0.882342		0.0429545
	gene26004		-0.882572		0.0469262
	gene10169		-0.887429		0.0221592
	gene00865		-0.888378		0.0309143
	gene28181		-0.888863		0.0223749
	gene10490		-0.891721		0.0132421
	gene02142		-0.892824		0.0290679
	gene09268		-0.893833		0.000230397
	gene30879		-0.894066		0.00273273
	gene13403		-0.894435		0.00311656
	gene01761	1.49773	-0.898013	0.00270804	0.0225264
	gene05155		-0.89843		0.0287978
	gene13790		-0.899086		0.0191747
	gene13197		-0.899435		0.0099166
	gene20620		-0.901079		0.0107585
	gene29292		-0.901373		0.0130349
	gene29104		-0.905232		0.00806803
	gene11132		-0.905295		0.0216119
	gene17572	-1.00695	-0.908548	0.0260882	0.0174566
	gene03959		-0.909641		0.0283776
	gene25329		-0.912119		0.0363546
	gene31584	1.08345	-0.912673	0.0289121	0.0320395
	gene20127		-0.912935		0.0110035
	gene03279		-0.913604		0.0136568
	gene29971		-0.913931		0.00975692
	gene15334		-0.914251		0.0256024
	gene20931		-0.91519		0.00162583
	gene29926		-0.916019		0.0044408
	gene08265		-0.918114		0.0106668
	gene04328		-0.918116		0.0102931
	gene07903	1.22704	-0.921043	0.00587232	0.0379426
	gene02513		-0.921295		0.0129085
	gene31716		-0.924204		0.0160058
	gene05000		-0.927321		0.0439702
	gene32466		-0.92895		0.0489021
	gene13418		-0.933542		0.0020938
	gene23119		-0.934007		0.00651866
	gene01833		-0.936588		0.036077
	gene26097		-0.939062		0.0219816
	gene18486		-0.939628		0.00323469
	gene21916		-0.94255		0.0054715
	gene13420		-0.942845		0.00225456
	gene29289		-0.942976		0.0202962
	gene15082	0.991594	-0.943193	0.0152794	0.00809476
	gene05089		-0.944044		0.0378495
	gene13802		-0.94589		0.0285696
	gene14353		-0.946354		0.00664117
	gene31719		-0.948517		0.0198214
	gene10059		-0.951301		0.035421
	gene25924		-0.951557		0.00583295
	gene23124		-0.953166		0.00111608
	gene23304	1.31662	-0.953854	0.00717802	0.0416888
	gene31375		-0.954068		0.00885132
	gene29826		-0.955051		0.00405984
	gene25981		-0.955635		0.00697304
	gene04903		-0.955975		0.0306444
	gene12328		-0.956132		0.00216863
	gene20940		-0.956822		0.00105937
	gene01375		-0.957101		0.000120641
	gene00561	1.03269	-0.958979	0.00686946	0.0108135
	gene03037		-0.959224		0.00137199
	gene09726		-0.959492		0.013472
	gene14596		-0.962127		0.00644318
	gene12927		-0.964608		0.0114266
	gene13913		-0.967685		0.0254558
	gene28433		-0.974262		0.0360684
	gene03828		-0.976407		0.00948667
	gene21570		-0.977025		0.0334221
	gene10586		-0.977725		0.00154653
	gene14035		-0.977788		0.00193719
	gene23873		-0.986342		0.0115097
	gene01689		-0.987292		0.00351838
	gene11389		-0.988305		0.0382385
	gene03873		-0.990022		0.020983
	gene07467		-0.990669		0.00183715
	gene24881		-0.991204		0.0276014
	gene24338		-0.993193		0.0193038
	gene21888		-0.9966		0.0216772
	gene26100		-0.998635		0.0030085
	gene25247		-1.00161		0.0098452
	gene26633		-1.00318		0.00988918
	gene00814	-1.05485	-1.0034	0.00302813	0.00222776
	gene03565		-1.01329		0.0236712
	gene30828		-1.01778		0.0367648
	gene11954		-1.01852		0.00989041
	gene29161		-1.01997		0.0488816
	gene23717		-1.02083		0.00323289
	gene06516		-1.0219		0.0117426
	gene18342	0.807057	-1.02487	0.00883609	0.00207576
	gene17764		-1.02577		0.00936088
	gene29468		-1.03073		0.0313846
	gene08322		-1.03504		0.0159433
	gene13301	0.907738	-1.0351	0.0474537	0.0181668
	gene29751		-1.0357		0.0118255
	gene30522		-1.04016		0.0210466
	gene30612		-1.04393		0.0377884
	gene11362		-1.04789		0.0298717
	gene20447		-1.05376		0.00783576
	gene24006		-1.05417		0.00458942
	gene20118		-1.06318		0.00235011
	gene20853		-1.06356		0.0015495
	gene11840		-1.0698		0.000935091
	gene30325		-1.07152		0.0375453
	gene03112		-1.07166		0.000633965
	gene03428		-1.07229		0.0224988
	gene10744		-1.07273		0.0116337
	gene04329		-1.07857		0.000538237
	gene27275		-1.08373		0.00445421
	gene09177	-0.87674	-1.0839	0.0166711	0.00544717
	gene10098		-1.08408		0.0109591
	gene10040		-1.08492		0.0333987
	gene11996		-1.08538		0.00200872
	gene17487		-1.08714		0.013293
	gene25115		-1.08833		0.0470949
	gene14343		-1.09244		0.00763576
	gene18121		-1.0931		0.0273779
	gene29671	1.57822	-1.09795	0.000658884	0.00777049
	gene12464		-1.10006		0.00051953
	gene21051	-1.23193	-1.10978	0.0378889	0.02954
	gene26234		-1.10989		0.00735756
	gene18826	1.49003	-1.11572	0.00415737	0.00707938
	gene01495		-1.11655		0.0218284
	gene00699		-1.12279		0.0164277
	gene17606		-1.12806		0.0112061
	gene29470		-1.13079		0.0359013
	gene08218	0.843422	-1.13099	0.031639	0.00690505
	gene13450		-1.13229		0.00254518
	gene15868		-1.13267		0.0151881
	gene13067		-1.13366		0.00309856
	gene26414		-1.13538		8.5082e-05
	gene21424		-1.145		0.00753685
	gene21293		-1.15047		0.000356391
	gene18627		-1.15122		0.0123478
	gene03036		-1.15621		0.00199304
	gene01752	1.21708	-1.16149	0.000210639	0.000397778
	gene16169		-1.16604		0.015647
	gene29033		-1.16703		0.0149857
	gene14172		-1.17005		0.0157506
	gene13500		-1.17677		0.00910567
	gene23859	0.914576	-1.17836	0.0150471	0.00273126
	gene02663		-1.18137		0.0246304
	gene26082		-1.18642		0.00254701
	gene18582		-1.18773		0.0468034
	gene25489		-1.18887		0.00552342
	gene25119		-1.19072		0.0275698
	gene26988		-1.19913		0.0263072
	gene30302		-1.20069		0.0348837
	gene02616		-1.20089		0.00429748
	gene23086	1.08098	-1.20426	0.0141126	0.00817975
	gene28926	-0.872209	-1.22555	0.0352157	0.0307863
	gene17395	-1.09088	-1.22732	0.049148	0.044156
	gene17658		-1.2313		0.0200226
	gene03320		-1.24143		0.00730622
	gene09392	0.861299	-1.24212	0.0386318	0.00595461
	gene02729		-1.24233		0.00185406
	gene03647		-1.2431		0.00184865
	gene24027		-1.24413		0.00562087
	gene03688	-0.971734	-1.24764	0.0460672	0.0302887
	gene28351		-1.25073		0.0041558
	gene26540		-1.26609		0.0365495
	gene32258	0.855101	-1.26845	0.0159878	0.0015251
	gene22797		-1.26886		0.0478716
	gene08919		-1.27387		0.00112813
	gene00230		-1.27489		0.00245262
	gene12696		-1.27726		0.000366372
	gene26876		-1.27774		0.00412704
	gene03043	1.42928	-1.27867	0.00846798	0.0160995
	gene16806		-1.30478		0.00449445
	gene04521		-1.31803		0.00028448
	gene09396		-1.31907		0.0186986
	gene13651		-1.32171		0.0161479
	gene03533		-1.33911		0.0410773
	gene17041		-1.34212		0.0242713
	gene01787		-1.34286		0.0190792
	gene05923		-1.35137		0.00345311
	gene05358		-1.35571		0.00549335
	gene21893	0.954314	-1.35892	0.0118123	0.00128588
	gene00411	-1.54243	-1.36216	0.028205	0.00874752
	gene24778		-1.36783		0.0394472
	gene21220		-1.3719		0.00744374
	gene09656		-1.37688		0.0090087
	gene06629		-1.38417		0.00240254
	gene00197		-1.38549		0.0169132
	gene09614		-1.38827		0.0025045
	gene04502		-1.39494		0.0492852
	gene14132		-1.40085		0.0450141
	gene18674		-1.40109		0.0463406
	gene07504		-1.40361		0.00842237
	gene01771		-1.40668		0.000267559
	gene05751		-1.40854		0.0039372
	gene03915		-1.41101		0.00282588
	gene01470		-1.41811		0.00407617
	gene30307		-1.42187		0.0168509
	gene23094		-1.42307		0.0267836
	gene07498	0.813174	-1.43009	0.0145483	0.000248055
	gene04338		-1.4369		0.014619
	gene01331		-1.43971		0.0147845
	gene17995		-1.44216		0.002542
	gene11995		-1.44824		0.000269151
	gene16174		-1.45367		0.00245965
	gene00688		-1.45553		0.0450193
	gene18240		-1.45797		0.0139243
	gene14949		-1.48621		0.0261932
	gene23187		-1.49057		0.00346234
	gene25201		-1.49313		0.0189932
	gene02095		-1.50002		0.00332402
	gene27873		-1.52844		0.032395
	gene08941	-1.16927	-1.55674	0.0389219	0.011985
	gene35018		-1.57382		0.00959331
	gene13351		-1.60209		0.0452195
	gene32398		-1.60512		0.0281447
	gene14916		-1.61568		0.00018003
	gene13191		-1.63602		0.0068432
	gene28358		-1.6427		0.00655892
	gene10392	1.47633	-1.65875	0.00678632	0.00380317
	gene11300		-1.68722		0.000262741
	gene13280	-1.27139	-1.70727	0.0299331	0.02664
	gene32361		-1.71062		0.0158152
	gene27782		-1.71487		0.0300342
	gene27761		-1.71659		0.000170436
	gene21717		-1.71899		0.00921129
	gene28087		-1.73704		0.0037758
	gene09533		-1.74247		0.0141432
	gene31056		-1.74553		0.0334347
	gene12491		-1.7464		0.0210409
	gene23609		-1.77065		0.0244109
	gene17325		-1.775		0.02223
	gene08952		-1.80603		0.00260944
	gene10947		-1.84937		0.0253616
	gene17713		-1.86826		0.0311118
	gene23653		-1.87754		0.0460105
	gene05591		-1.8864		0.0402923
	gene11951		-1.93504		0.0170915
	gene05646		-1.9403		0.0206141
	gene18914		-1.9626		0.000161682
	gene30366		-1.98174		0.0132176
	gene23388		-2.04068		0.0289083
	gene06792		-2.0539		0.0384898
	gene04520		-2.07515		0.0013296
	gene32566		-2.11521		0.0338868
	gene13189	1.53388	-2.13435	0.000311213	7.07659e-06
	gene18318		-2.1545		0.03915
	gene24987		-2.18765		0.0325399
	gene13435		-2.21091		0.0326514
	gene25341		-2.29059		0.0357212
	gene23097		-2.29818		0.00354944
	gene21218		-2.31417		0.000544404
	gene00661		-2.34585		0.00356691
	gene02539		-2.35012		0.00674332
	gene10816	-2.45037	-2.37657	0.0269185	0.0434421
	gene13799		-2.45537		0.0212369
	gene19231		-2.46064		0.0404182
	gene21542		-2.49568		0.018377
	gene17641		-2.51741		0.0255244
	gene17268		-2.61959		0.0382298
	gene00606		-2.63973		0.0320027
	gene25203		-2.64604		0.0185888
	gene27101		-2.65818		0.00828092
	gene16514		-2.66766		0.0395358
	gene02242		-2.70484		0.0147161
	gene27363		-2.7303		0.0500999
	gene21006		-2.75118		0.0118176
	gene00710		-2.79742		0.0360091
	gene18441		-2.79804		0.0307301
	gene14963		-2.82212		0.0101285
	gene13610		-2.83361		0.00510062
	gene24175		-2.8421		0.00588845
	gene01886		-2.85148		0.0178927
	gene15316		-2.86192		0.00867096
	gene18383		-2.91914		0.0237692
	gene28473		-2.95042		0.0111999
	gene07957		-3.12184		0.0450208
	gene32587		-3.17807		0.00878229
	gene20098		-3.44968		0.0322747
	gene22957		-3.49814		0.00182294
	gene23960	6.05414		0.0453148
	gene16131	4.25055		0.00116278
	gene04896	4.0899		0.014599
	gene17580	3.60728		0.0366885
	gene15030	3.53328		0.0100359
	gene01896	3.29579		0.000887468
	gene14058	3.16008		0.00758583
	gene13973	3.07314		0.0115708
	gene06846	2.99408		0.0490486
	gene10013	2.98426		0.00131847
	gene08891	2.97803		0.00398464
	gene34105	2.90973		0.0172638
	gene20439	2.90494		0.0143185
	gene09417	2.88696		0.0402875
	gene32700	2.88471		0.0333201
	gene18353	2.79377		0.0219298
	gene26885	2.78805		0.00129024
	gene03330	2.76798		0.000403817
	gene24296	2.72475		0.0207092
	gene24573	2.66554		0.0272281
	gene28656	2.51557		0.0194758
	gene08006	2.50753		0.024078
	gene25416	2.50673		0.0458341
	gene20295	2.47022		0.031746
	gene16763	2.43114		0.0340201
	gene13673	2.42075		0.0425823
	gene22715	2.4197		0.020496
	gene30586	2.41179		0.0104011
	gene26265	2.39978		0.00828661
	gene00482	2.39911		0.00631849
	gene18470	2.39456		0.0356324
	gene22676	2.34392		0.0129917
	gene27453	2.29958		0.0493062
	gene35163	2.27865		0.0457748
	gene01418	2.2655		0.0398234
	gene04177	2.24712		0.0467048
	gene17519	2.22565		0.0450963
	gene17698	2.22479		0.0153928
	gene10395	2.2198		0.000660398
	gene13273	2.21045		0.00329881
	gene23777	2.2022		0.00699708
	gene01344	2.17657		0.0340754
	gene05122	2.15608		0.00302818
	gene21906	2.14568		0.0219205
	gene25258	2.14358		0.0194068
	gene28657	2.14224		0.0462871
	gene34339	2.10704		0.0100423
	gene23448	2.09171		0.0231076
	gene17473	2.07887		0.000247234
	gene00187	2.05396		0.0026402
	gene09721	2.05102		0.0071282
	gene18104	2.04761		0.0457941
	gene22562	2.02888		0.0397059
	gene07901	2.01757		0.00813658
	gene21905	2.00515		0.000284701
	gene24860	1.99514		0.0206132
	gene34068	1.95419		0.00183662
	gene01442	1.9515		0.0283342
	gene12591	1.94223		0.00829832
	gene17416	1.9239		0.0139883
	gene15632	1.91492		0.000983615
	gene32084	1.91362		0.00146812
	gene02187	1.90825		0.0221507
	gene18183	1.89723		0.0133352
	gene08940	1.89504		0.0188974
	gene22480	1.88531		0.0412693
	gene31335	1.86191		0.0023108
	gene07935	1.85573		0.00739628
	gene34439	1.8518		0.0324619
	gene23830	1.84695		0.039032
	gene10286	1.80076		0.0335831
	gene31206	1.79104		0.00685154
	gene31239	1.78671		0.00999639
	gene06309	1.78581		0.0493167
	gene07065	1.76285		0.00854801
	gene05267	1.7602		0.0376901
	gene05898	1.74715		0.0131662
	gene17531	1.7374		0.00262302
	gene13147	1.72998		0.0217107
	gene18776	1.72439		0.00156506
	gene02474	1.71826		0.00562848
	gene05814	1.71196		0.0169747
	gene29489	1.70098		0.0241927
	gene15829	1.68653		0.0444205
	gene06308	1.67665		0.0100125
	gene23550	1.67305		0.016269
	gene05463	1.66436		0.00553851
	gene24191	1.64766		0.00326676
	gene05107	1.64224		0.00526734
	gene27557	1.63169		0.0309206
	gene09151	1.62979		0.0228528
	gene18246	1.62322		0.000183121
	gene05123	1.61566		0.019216
	gene27853	1.61065		2.56619e-05
	gene08561	1.58246		0.0213197
	gene31238	1.56874		0.0114013
	gene26835	1.55728		0.0169246
	gene05542	1.55259		0.0245039
	gene01897	1.55007		0.0144726
	gene34008	1.54133		0.0281419
	gene06169	1.54108		0.00241373
	gene13272	1.53446		0.0111421
	gene30779	1.52945		0.0407811
	gene20062	1.52623		0.0152156
	gene17100	1.52546		0.0172115
	gene21638	1.52143		0.0361534
	gene26343	1.52004		0.0146538
	gene17408	1.51422		0.046881
	gene13274	1.50788		0.0138502
	gene08920	1.50593		0.0108585
	gene16887	1.49874		0.00378794
	gene32066	1.49178		0.0136659
	gene09879	1.48525		0.041468
	gene19793	1.48279		0.0226881
	gene28406	1.48143		0.0324879
	gene18600	1.47971		0.0403982
	gene06827	1.47504		0.0450854
	gene08959	1.46757		0.0162187
	gene10349	1.46401		0.0238583
	gene17631	1.46173		0.0256493
	gene00660	1.46043		0.00811581
	gene00405	1.45798		0.000283565
	gene26022	1.45789		0.0112762
	gene13125	1.45346		0.0105077
	gene07088	1.45339		0.0252573
	gene19499	1.45272		0.0417667
	gene18170	1.45079		0.0384734
	gene12723	1.44723		0.0127314
	gene04776	1.44718		0.00838445
	gene32081	1.44617		0.000670236
	gene27706	1.44579		0.0140108
	gene28014	1.44171		0.0030605
	gene25469	1.4407		0.01404
	gene13212	1.43544		0.00293737
	gene22352	1.43388		0.0097189
	gene10882	1.43012		0.0500687
	gene27705	1.4291		0.0461626
	gene25315	1.42639		0.0255203
	gene10105	1.42468		0.00524413
	gene15595	1.41597		0.0311073
	gene33873	1.41559		0.0470861
	gene24659	1.41447		0.0444378
	gene00377	1.40219		0.0422839
	gene31032	1.38946		0.000598305
	gene30616	1.38753		0.00535963
	gene06604	1.38446		0.0428934
	gene26275	1.38047		0.0146851
	gene19263	1.37167		0.0318498
	gene32186	1.36866		2.07345e-05
	gene28060	1.3683		0.0267281
	gene27369	1.36391		0.0066357
	gene16092	1.36157		0.00516562
	gene10948	1.35306		0.0279529
	gene25082	1.34359		0.00298161
	gene31030	1.3423		0.0284776
	gene21678	1.33953		0.0106725
	gene16049	1.33542		0.0421345
	gene23009	1.33482		0.00619458
	gene10405	1.3318		0.0228977
	gene17555	1.32999		0.0113507
	gene19636	1.32677		0.00751118
	gene03585	1.31829		0.00155108
	gene08000	1.31676		0.0155283
	gene19767	1.31429		0.0173994
	gene13718	1.31378		0.0281221
	gene22163	1.30559		0.0155333
	gene04905	1.30511		0.0318523
	gene04475	1.30447		0.0447813
	gene15174	1.30369		0.00521778
	gene22124	1.30042		0.0461813
	gene19005	1.29586		0.0278331
	gene22937	1.29404		0.00158143
	gene29776	1.29355		0.0294354
	gene16196	1.29287		0.0303772
	gene04312	1.28839		0.0395219
	gene31864	1.28748		0.0158836
	gene14601	1.2861		0.00384354
	gene21503	1.2826		0.00186156
	gene24858	1.28151		0.00415011
	gene09720	1.27777		0.0023058
	gene21537	1.2775		0.00874356
	gene26135	1.27543		0.00252682
	gene05889	1.27543		0.00141997
	gene30216	1.27373		0.0032267
	gene26483	1.26539		0.0122297
	gene25061	1.26367		0.00469683
	gene21651	1.26148		0.00360741
	gene12072	1.2608		0.0196687
	gene24748	1.26042		0.00154626
	gene32629	1.25941		0.0146827
	gene31205	1.25878		0.00867887
	gene02221	1.24916		0.0134387
	gene20726	1.24576		0.0188476
	gene26629	1.24471		0.0448937
	gene06047	1.24399		0.0443157
	gene04443	1.24393		0.0011426
	gene02675	1.24349		0.0105086
	gene03761	1.23979		0.00552745
	gene05799	1.23713		0.0475354
	gene24407	1.23565		0.000868422
	gene32451	1.2347		0.0163303
	gene30849	1.22755		0.0347796
	gene19411	1.22749		0.00344051
	gene13600	1.22428		0.000327106
	gene18329	1.22335		0.0261702
	gene25939	1.22313		0.0244522
	gene18505	1.22038		0.0431018
	gene32423	1.21853		0.0143361
	gene18328	1.21771		0.00744148
	gene34224	1.21766		0.0311322
	gene04304	1.2165		0.00227887
	gene13399	1.21604		0.0410219
	gene31149	1.21256		0.000951981
	gene15751	1.21108		0.0448605
	gene21072	1.21039		0.000580222
	gene10807	1.21013		0.000183918
	gene31106	1.20675		0.00477083
	gene30836	1.20275		0.010997
	gene28461	1.20208		0.00042904
	gene15903	1.20036		0.0461895
	gene14674	1.19145		0.000408119
	gene06565	1.1889		0.0393913
	gene18402	1.18568		0.020913
	gene17096	1.18417		0.0108607
	gene23895	1.18359		0.0425296
	gene08729	1.181		0.000185433
	gene02435	1.17712		0.00700235
	gene32087	1.17531		0.00844224
	gene08653	1.17446		0.0282928
	gene04420	1.17308		0.0169292
	gene19765	1.17232		0.000737479
	gene30224	1.16763		0.00484476
	gene05376	1.16301		0.000498032
	gene07428	1.16228		0.0210258
	gene23188	1.15812		0.0473476
	gene15119	1.15284		0.00795663
	gene08319	1.152		0.0346164
	gene18542	1.1489		0.0325869
	gene07999	1.14663		0.025778
	gene26342	1.14652		0.0148475
	gene05781	1.14315		0.000130661
	gene03701	1.13942		0.00926316
	gene24032	1.13884		0.0183641
	gene10550	1.13636		0.0237042
	gene01466	1.13496		0.0164392
	gene21298	1.13494		0.0381297
	gene18101	1.12898		0.0125889
	gene32207	1.12867		0.0478361
	gene31251	1.12745		0.0262065
	gene16378	1.126		0.0494594
	gene20872	1.1199		0.0178271
	gene14669	1.11894		8.05385e-05
	gene24553	1.11834		0.00568686
	gene29013	1.11733		0.000113625
	gene03864	1.11526		0.035156
	gene12300	1.11214		0.00396034
	gene27383	1.1094		0.00202037
	gene13476	1.10929		0.000454507
	gene17376	1.10676		0.0260293
	gene08986	1.10623		0.0103694
	gene06162	1.10412		0.00415475
	gene34073	1.1028		0.0150441
	gene19227	1.09968		0.000304748
	gene32648	1.09852		0.00113102
	gene24506	1.09597		0.00600819
	gene17865	1.09361		0.01462
	gene08213	1.08867		0.00208115
	gene19192	1.08283		0.0194368
	gene29890	1.0792		0.000295171
	gene12546	1.07872		0.000346321
	gene02223	1.07795		0.0476373
	gene07514	1.07755		0.00624769
	gene03620	1.07632		0.00154754
	gene02704	1.07629		0.0195961
	gene16261	1.07559		0.000196106
	gene14224	1.0742		0.0192373
	gene15859	1.07293		0.0257439
	gene30889	1.07035		0.00706475
	gene23752	1.07024		0.00164545
	gene13038	1.06901		0.0480426
	gene30125	1.062		0.00505459
	gene15628	1.05969		0.0179296
	gene17332	1.05873		0.040214
	gene13037	1.05766		0.00365455
	gene05800	1.05654		0.0190671
	gene21284	1.05598		0.00432069
	gene29698	1.05482		0.0319539
	gene13141	1.04881		0.0230149
	gene29021	1.0407		0.00469591
	gene21322	1.0405		0.00625636
	gene26698	1.04046		0.00238749
	gene20865	1.03947		0.00954522
	gene02514	1.0387		0.0346366
	gene24485	1.03799		0.0118053
	gene03869	1.03659		0.00980418
	gene23251	1.03443		0.00147784
	gene18765	1.03399		0.0365813
	gene05645	1.03328		0.00261709
	gene19269	1.03272		0.00230283
	gene32240	1.03101		0.0214601
	gene18181	1.03097		0.0196139
	gene13195	1.02985		0.00175934
	gene21577	1.02894		0.0131032
	gene17114	1.02538		0.00955275
	gene02700	1.02492		0.00217524
	gene10611	1.02473		0.000530934
	gene03861	1.01904		0.0257635
	gene29201	1.01869		0.00253292
	gene10806	1.01754		0.00176831
	gene27907	1.01735		0.000230686
	gene24726	1.01733		0.0136672
	gene18709	1.01693		0.0191944
	gene21228	1.01288		0.0128571
	gene18624	1.01188		0.00709488
	gene21378	1.0116		0.0113093
	gene03935	1.00634		0.00170056
	gene29371	1.0056		0.0432874
	gene23936	1.00533		0.0226012
	gene05501	1.00463		0.00839432
	gene09932	1.00434		0.00115407
	gene01614	1.00275		0.0469254
	gene30350	0.998933		0.0282324
	gene11236	0.995472		0.0326971
	gene06046	0.993137		0.00832588
	gene22190	0.992476		0.0261258
	gene03904	0.992006		4.66766e-05
	gene13743	0.991399		0.0298674
	gene00878	0.988628		0.00300196
	gene02550	0.987967		0.00708795
	gene12102	0.987869		0.00353452
	gene05631	0.981924		0.0398744
	gene15514	0.981601		0.00048623
	gene22159	0.979128		0.0474658
	gene27625	0.978285		0.0432838
	gene03850	0.978196		0.0133431
	gene24031	0.977765		0.0234331
	gene27291	0.97693		0.00909641
	gene16587	0.975836		0.000688867
	gene12855	0.975365		0.00146469
	gene03543	0.975199		0.0236466
	gene25188	0.974817		0.0262493
	gene12319	0.974425		0.00327315
	gene13588	0.973881		0.00264906
	gene23293	0.972384		5.94743e-05
	gene26094	0.972376		0.0239215
	gene13873	0.965499		0.001669
	gene17327	0.965121		0.0126958
	gene05064	0.962957		0.00124096
	gene17331	0.958197		0.0354146
	gene18621	0.957708		0.0182939
	gene11511	0.955445		0.0340186
	gene10465	0.953487		0.0158216
	gene00996	0.945807		0.00103152
	gene02257	0.94548		0.00196282
	gene22506	0.945115		0.00949419
	gene11750	0.944542		0.0318744
	gene10067	0.940132		0.00123846
	gene22431	0.938801		0.0040982
	gene17799	0.938479		0.0158881
	gene27448	0.937776		0.000496939
	gene15994	0.936721		0.00601412
	gene31809	0.936266		0.00153184
	gene27707	0.935731		0.0167311
	gene30399	0.935637		0.00690999
	gene16732	0.933823		0.0127588
	gene29492	0.931599		0.00962264
	gene27267	0.930682		0.0426261
	gene11228	0.930133		0.0425398
	gene00609	0.925529		0.0391119
	gene23264	0.924651		0.0152525
	gene10080	0.924047		0.00477638
	gene19518	0.923709		0.0113029
	gene16423	0.92285		0.00218287
	gene24434	0.921377		0.0487857
	gene08482	0.918853		0.00193913
	gene13153	0.918605		0.0311107
	gene03597	0.916851		0.00842787
	gene16338	0.916706		0.000463565
	gene13529	0.91535		0.000617125
	gene10606	0.914844		0.000316461
	gene17506	0.913948		0.0108414
	gene08099	0.913549		0.000143678
	gene20169	0.91331		0.0132498
	gene32285	0.912546		0.000347414
	gene08702	0.911565		0.0419198
	gene10422	0.910837		0.00210302
	gene27963	0.910728		0.000185427
	gene19519	0.908072		0.000318102
	gene17952	0.907868		0.00302706
	gene14339	0.907276		0.000838909
	gene15609	0.905718		0.00628562
	gene15079	0.904593		0.0146034
	gene20972	0.904108		0.00689309
	gene32520	0.903926		0.00648907
	gene20921	0.903748		0.00139949
	gene15691	0.903001		0.0334369
	gene03056	0.901818		0.00133461
	gene06599	0.901037		0.00596665
	gene00126	0.898615		0.0352308
	gene19367	0.897092		0.0406696
	gene29357	0.894477		0.0419521
	gene05912	0.892613		0.00864742
	gene02384	0.891108		0.0104037
	gene20012	0.891016		0.00898498
	gene32366	0.890652		0.0334929
	gene22621	0.889774		0.0499928
	gene08290	0.888593		0.0168835
	gene31477	0.888519		0.0321276
	gene30315	0.887003		0.00568569
	gene12147	0.884935		0.00269804
	gene06739	0.884455		0.046319
	gene32175	0.884193		0.00532885
	gene00864	0.883799		0.0112385
	gene13648	0.883544		0.0439863
	gene16672	0.882462		0.00307869
	gene31297	0.882102		0.0048104
	gene21565	0.881998		0.00313622
	gene32304	0.881949		0.000956861
	gene29858	0.881189		0.0457707
	gene28701	0.880856		0.00151054
	gene06045	0.88012		0.00165466
	gene08624	0.879717		0.0104981
	gene12438	0.879397		0.00155339
	gene03365	0.878127		0.00421548
	gene28630	0.877697		0.00862846
	gene18361	0.877529		0.00693519
	gene05705	0.876758		0.000606529
	gene18538	0.8729		0.00558972
	gene06290	0.870556		0.0382503
	gene30963	0.869091		0.000833216
	gene16284	0.868378		0.0201557
	gene09305	0.868152		0.00423387
	gene28316	0.867729		0.000697629
	gene15613	0.867128		0.00212987
	gene06551	0.866134		0.0449969
	gene25040	0.866126		0.00876723
	gene26143	0.865045		0.00122312
	gene08737	0.864733		0.00323595
	gene28703	0.863021		0.00382226
	gene18380	0.862504		0.032228
	gene05963	0.861773		0.00686605
	gene19134	0.860196		0.0205604
	gene31208	0.859193		0.00911669
	gene20487	0.857502		0.0225801
	gene21342	0.857069		0.0488891
	gene09448	0.856916		0.00322861
	gene15737	0.855725		0.00644192
	gene19940	0.855375		0.0289954
	gene29108	0.854652		0.0210869
	gene09792	0.854278		0.0340352
	gene22810	0.853756		0.0106007
	gene09805	0.853141		0.000420663
	gene27180	0.852128		0.00175102
	gene29996	0.850489		0.00692074
	gene21826	0.848989		0.0150212
	gene04894	0.847877		0.0055103
	gene24887	0.846478		0.0135081
	gene28004	0.84612		0.00161099
	gene22595	0.84421		0.0151505
	gene01195	0.843911		0.0111993
	gene22395	0.841101		0.00106017
	gene03575	0.840693		0.00621357
	gene28189	0.840521		0.0133461
	gene18539	0.840173		0.000437956
	gene08148	0.83972		0.0194657
	gene01197	0.839437		0.0423327
	gene25223	0.837836		0.0232299
	gene25906	0.837508		0.00309818
	gene06539	0.836147		0.00648861
	gene30155	0.835907		0.000788505
	gene05372	0.834496		0.00736905
	gene27831	0.833006		0.0031115
	gene09856	0.830136		0.00225243
	gene08617	0.826267		0.0341267
	gene09580	0.825979		0.0192904
	gene02671	0.825506		0.00205736
	gene13366	0.824435		0.00555764
	gene32086	0.824132		0.0151848
	gene22709	0.823685		0.00439419
	gene30807	0.823075		0.000609624
	gene00933	0.822961		0.0275039
	gene17879	0.822813		0.036962
	gene06016	0.8228		0.00214674
	gene21474	0.822722		0.0263294
	gene01374	0.822297		0.0233719
	gene21891	0.821272		0.0177853
	gene20969	0.818359		0.0265208
	gene28881	0.818308		0.0136051
	gene14732	0.817772		0.0177065
	gene25841	0.816959		0.00269998
	gene26344	0.816697		0.0131692
	gene08900	0.816114		0.00722809
	gene08293	0.816073		0.035195
	gene17250	0.815208		0.0244258
	gene29128	0.811466		0.00242901
	gene09204	0.811395		0.00745601
	gene17411	0.811113		0.0317678
	gene23002	0.810406		0.000669061
	gene18700	0.808986		0.0427379
	gene27140	0.808758		0.0222619
	gene13530	0.808283		0.0169709
	gene13490	0.807655		0.00158738
	gene01898	0.805612		0.0358937
	gene29045	0.805424		0.0391028
	gene01491	0.804882		0.0257268
	gene09876	0.804574		0.0239148
	gene30496	0.804498		0.00035613
	gene17851	0.80355		0.00927304
	gene05642	0.803341		0.0327715
	gene16800	0.801811		0.0149203
	gene28117	0.800918		0.0163266
	gene21934	0.800463		0.0131238
	gene19556	0.800321		0.00433218
	gene13839	0.800066		0.0113255
	gene15528	-0.801193		0.0184056
	gene28341	-0.808615		0.0315386
	gene03721	-0.813562		0.00719621
	gene08552	-0.814378		0.0153996
	gene19866	-0.818471		0.00103362
	gene24056	-0.818887		0.0234034
	gene21268	-0.819041		0.0355378
	gene22650	-0.82104		0.0318033
	gene09709	-0.821321		0.00478935
	gene24493	-0.821969		0.0225142
	gene14624	-0.822333		0.00830472
	gene00613	-0.822974		0.00382443
	gene15917	-0.824303		0.036927
	gene01463	-0.825048		0.00657596
	gene07885	-0.828935		0.0194006
	gene12669	-0.83075		0.0253243
	gene21846	-0.832044		0.00192889
	gene05071	-0.833598		0.0230622
	gene12886	-0.8358		0.0134732
	gene32183	-0.838586		0.0139674
	gene13768	-0.841938		0.0304607
	gene00655	-0.844909		0.0187272
	gene31962	-0.846371		0.0402153
	gene28942	-0.846624		0.0478252
	gene31615	-0.847051		0.00554244
	gene00888	-0.847741		0.00646616
	gene19105	-0.847767		0.0281643
	gene22440	-0.848258		0.0436635
	gene07423	-0.851303		0.0444021
	gene31233	-0.852203		0.0198757
	gene31560	-0.853365		0.0256392
	gene18186	-0.855343		0.0470648
	gene09047	-0.856849		0.012337
	gene28308	-0.861622		0.0362243
	gene13003	-0.863981		0.0453504
	gene30673	-0.864346		0.0171982
	gene31765	-0.864745		0.00823237
	gene08895	-0.865368		0.0404355
	gene27925	-0.86561		0.0301006
	gene19709	-0.870515		0.0364411
	gene11189	-0.871661		0.0198355
	gene10748	-0.873589		0.0257717
	gene16859	-0.873659		0.0248445
	gene23919	-0.873694		0.0153486
	gene01548	-0.875657		0.0137726
	gene20050	-0.875955		0.0398704
	gene17621	-0.87604		0.0127171
	gene19828	-0.879716		0.0217451
	gene29242	-0.881502		0.0469627
	gene01181	-0.88853		0.005726
	gene01214	-0.888938		0.0393978
	gene24634	-0.88937		0.0369357
	gene03396	-0.891088		0.0244611
	gene16305	-0.892939		0.0151603
	gene08741	-0.893898		0.00267371
	gene04856	-0.900463		0.0331656
	gene31945	-0.900545		0.00418529
	gene09188	-0.901381		0.0496321
	gene24655	-0.90146		0.00484516
	gene20508	-0.902765		0.0231849
	gene06503	-0.903005		0.0336447
	gene09468	-0.905188		0.0117366
	gene34694	-0.90676		0.0418464
	gene26781	-0.907212		0.0499899
	gene30695	-0.910756		0.00720089
	gene01682	-0.911071		0.00830693
	gene05824	-0.914792		0.0374966
	gene24459	-0.914866		0.019213
	gene19103	-0.915327		0.0345148
	gene20346	-0.917774		0.00204758
	gene03625	-0.917993		0.0303921
	gene14557	-0.919801		0.0131214
	gene30919	-0.92187		0.00890056
	gene02292	-0.922437		0.0383715
	gene16897	-0.922576		0.045285
	gene15653	-0.92418		0.017543
	gene25209	-0.925		0.0459318
	gene28873	-0.925994		0.00336891
	gene27475	-0.934856		0.0187686
	gene00773	-0.935814		0.023894
	gene12692	-0.936958		0.0019042
	gene04301	-0.936978		0.00893036
	gene01405	-0.937181		0.0211566
	gene21514	-0.94716		0.0173348
	gene15704	-0.947994		0.0306043
	gene07747	-0.951184		0.0258772
	gene14535	-0.953654		0.0276668
	gene01223	-0.954346		0.0173347
	gene23095	-0.95551		0.0498644
	gene26910	-0.955544		0.00889594
	gene13708	-0.956117		0.00928325
	gene04428	-0.957491		0.0410357
	gene15210	-0.958863		0.0469341
	gene11361	-0.95893		0.0116449
	gene24322	-0.958991		0.00514555
	gene26122	-0.959635		0.034585
	gene30979	-0.960771		0.0090575
	gene05091	-0.960998		0.025086
	gene24816	-0.96359		0.043891
	gene15145	-0.963811		0.0253692
	gene23878	-0.964311		0.0492955
	gene27477	-0.96591		0.0173592
	gene18583	-0.966803		0.0273677
	gene16482	-0.967889		0.0295926
	gene22490	-0.969493		0.04961
	gene03806	-0.971735		0.0483797
	gene06560	-0.973528		0.00906
	gene11327	-0.976299		0.0223237
	gene27496	-0.982919		0.0241339
	gene32504	-0.983621		0.00236045
	gene08537	-0.990927		0.0384981
	gene28516	-0.991305		0.00372307
	gene29247	-0.993603		0.00933188
	gene17105	-0.993792		0.00356055
	gene27476	-0.995456		0.0136046
	gene17541	-0.997733		0.00978294
	gene25731	-0.999043		0.0303234
	gene02011	-1.0006		0.00991611
	gene03347	-1.00643		0.0026141
	gene11979	-1.00679		0.0157535
	gene12765	-1.00723		0.0111436
	gene00689	-1.01035		0.0301445
	gene13277	-1.01503		0.0197517
	gene30598	-1.01524		0.0183605
	gene04493	-1.01594		0.0473402
	gene26830	-1.01602		0.00690035
	gene05305	-1.01805		0.0275474
	gene11811	-1.01821		0.00756488
	gene08835	-1.01823		0.0393188
	gene04409	-1.01861		0.00258033
	gene30841	-1.02006		0.0304713
	gene14263	-1.02171		0.00622944
	gene00551	-1.02211		0.0309007
	gene31902	-1.02405		0.00664546
	gene20863	-1.02521		0.0167481
	gene08175	-1.03006		0.016304
	gene12077	-1.03359		0.0178081
	gene02209	-1.03376		0.00630962
	gene25674	-1.03602		0.0163494
	gene23537	-1.03837		0.0168577
	gene04223	-1.04425		0.0250704
	gene13414	-1.04646		0.027022
	gene09351	-1.0479		0.0131014
	gene15374	-1.04958		0.00438028
	gene14480	-1.05084		0.000747707
	gene06022	-1.05102		0.0465861
	gene10006	-1.05422		0.0365973
	gene27474	-1.05514		0.00273866
	gene04261	-1.05522		0.0175235
	gene10831	-1.05635		0.00841895
	gene00235	-1.05731		0.0305947
	gene08853	-1.05894		0.022814
	gene26130	-1.05997		0.0236606
	gene02191	-1.0601		0.0417465
	gene22921	-1.06182		0.0375848
	gene02376	-1.06504		0.0228475
	gene30694	-1.06703		0.00247788
	gene28785	-1.0675		0.0304591
	gene03005	-1.06776		0.0140109
	gene20033	-1.0693		0.015376
	gene22092	-1.06994		0.00589474
	gene19235	-1.07242		0.00949615
	gene18108	-1.07384		0.0293089
	gene14748	-1.07385		0.00372143
	gene07502	-1.07938		0.0240718
	gene13488	-1.08327		0.0365994
	gene29986	-1.08499		0.00253717
	gene24063	-1.08653		0.00339946
	gene29727	-1.09285		0.0315054
	gene27576	-1.09419		0.0359113
	gene27596	-1.09596		0.0242988
	gene07491	-1.09627		0.025431
	gene27309	-1.09631		0.0434593
	gene22573	-1.09657		0.0039784
	gene03607	-1.09705		0.0197926
	gene27868	-1.09714		0.0157096
	gene10100	-1.10131		0.0168013
	gene06720	-1.10392		0.0112324
	gene31475	-1.10502		0.0306388
	gene15503	-1.10607		0.00759021
	gene11210	-1.11077		0.0160371
	gene19953	-1.11086		0.019468
	gene31756	-1.11162		0.00177525
	gene12862	-1.11484		0.00380602
	gene10191	-1.11622		0.0390323
	gene06770	-1.11919		0.0138804
	gene13205	-1.12086		0.037054
	gene00793	-1.12984		0.000956821
	gene19039	-1.13758		0.0380718
	gene14261	-1.14159		0.0211221
	gene09788	-1.14165		0.00202593
	gene19817	-1.14322		0.0112337
	gene22965	-1.14535		0.0125436
	gene06074	-1.14784		0.0137719
	gene11409	-1.14993		0.0259112
	gene05942	-1.15006		0.0130517
	gene19002	-1.15225		0.0255226
	gene17737	-1.16242		0.00999124
	gene16053	-1.16722		0.00403767
	gene16075	-1.16845		0.0290729
	gene23117	-1.16921		0.0305328
	gene22170	-1.17242		0.0359817
	gene02655	-1.17641		0.00893429
	gene25954	-1.17935		0.0128759
	gene25661	-1.17955		0.00285812
	gene16677	-1.17984		0.0114676
	gene13575	-1.18077		0.000339109
	gene13642	-1.1822		0.000749365
	gene31599	-1.1827		0.0114603
	gene05010	-1.18281		0.0109207
	gene18592	-1.18481		0.0485961
	gene05724	-1.18573		0.0026446
	gene12818	-1.18598		0.00286671
	gene31562	-1.18793		0.0397246
	gene18385	-1.19214		0.000454083
	gene24733	-1.19239		0.00120672
	gene13102	-1.19279		0.0305326
	gene20593	-1.1968		0.00533164
	gene35140	-1.19719		0.0390274
	gene13397	-1.19934		0.0364269
	gene18075	-1.20128		0.0401293
	gene26445	-1.20197		0.0276879
	gene20358	-1.20306		0.0195121
	gene19853	-1.20413		0.0195387
	gene08646	-1.20539		0.000609203
	gene31004	-1.20831		0.0203018
	gene25208	-1.21044		0.016947
	gene14832	-1.21103		0.0320939
	gene23997	-1.21106		0.0362971
	gene30471	-1.2124		0.0315143
	gene18112	-1.21691		0.0033092
	gene05443	-1.21805		0.0441066
	gene17083	-1.21956		0.0480098
	gene22625	-1.22039		0.0130835
	gene16676	-1.22407		0.00143289
	gene19995	-1.23108		0.0123645
	gene21662	-1.23314		0.0010107
	gene21976	-1.23444		0.0407006
	gene21442	-1.23779		0.00961876
	gene13584	-1.23952		0.0368586
	gene28332	-1.24056		0.0263839
	gene11149	-1.24102		0.0365456
	gene33840	-1.2462		0.0488088
	gene03809	-1.24628		0.0077457
	gene13629	-1.24832		0.0369469
	gene06814	-1.25165		0.00172063
	gene12760	-1.25325		0.0444292
	gene15459	-1.25443		0.0413819
	gene12461	-1.25455		0.0478367
	gene09727	-1.26345		0.0126503
	gene05312	-1.26611		0.0287311
	gene10758	-1.26673		0.0222907
	gene22410	-1.26918		0.017908
	gene22109	-1.27294		0.0109836
	gene28725	-1.2789		0.0182471
	gene27257	-1.27921		0.0204452
	gene09367	-1.28145		0.0121535
	gene26054	-1.28279		0.0261053
	gene04350	-1.28838		0.0452554
	gene15096	-1.28962		0.0343796
	gene29865	-1.29112		0.0204109
	gene16734	-1.29118		0.0277134
	gene26038	-1.29321		0.00441183
	gene18733	-1.29369		0.00191169
	gene24298	-1.2953		0.0234055
	gene00838	-1.29654		0.00124571
	gene26533	-1.29682		0.0398863
	gene17396	-1.29771		0.0355477
	gene00291	-1.29838		0.00301336
	gene07793	-1.30164		0.0214261
	gene20104	-1.30531		0.00708452
	gene03235	-1.30537		0.0366821
	gene04996	-1.30795		0.00861279
	gene17131	-1.3085		0.0390282
	gene23932	-1.31		0.0347783
	gene32561	-1.31012		0.034837
	gene01962	-1.31308		0.043904
	gene25725	-1.31427		0.0296709
	gene20591	-1.32654		0.0253598
	gene27677	-1.33903		0.0494719
	gene13972	-1.34075		0.0076602
	gene00624	-1.34747		0.0254789
	gene25749	-1.35032		0.0484577
	gene05120	-1.35168		0.0353917
	gene05574	-1.35228		0.0104679
	gene20408	-1.35808		0.0167459
	gene19844	-1.35813		0.0365992
	gene12323	-1.36364		0.00902427
	gene30573	-1.36476		0.036884
	gene09549	-1.36798		0.0125318
	gene31714	-1.36851		0.00713097
	gene23931	-1.37072		0.0285891
	gene13520	-1.37473		0.0372959
	gene15474	-1.37661		0.0278601
	gene05681	-1.37793		0.0125276
	gene14514	-1.3823		0.0460606
	gene31047	-1.38476		0.0215561
	gene13988	-1.39414		0.0139607
	gene02528	-1.39455		0.027541
	gene28051	-1.39632		0.0479347
	gene09493	-1.39896		6.28768e-05
	gene19372	-1.40063		0.00155139
	gene28427	-1.4015		0.0149399
	gene30514	-1.40154		0.0122469
	gene02288	-1.4029		0.024875
	gene21374	-1.4042		0.00443752
	gene15089	-1.41112		0.00915702
	gene35047	-1.41695		0.0334269
	gene11208	-1.4178		0.0019861
	gene01607	-1.41815		0.0231575
	gene21241	-1.42402		0.0391501
	gene24327	-1.42427		0.00322516
	gene01878	-1.42523		0.0473845
	gene29006	-1.42632		0.0154789
	gene22264	-1.42964		0.0387897
	gene27653	-1.43213		0.00842266
	gene25948	-1.4365		0.0304934
	gene28092	-1.43868		0.0213729
	gene06873	-1.43946		0.0301276
	gene17812	-1.44104		0.0210948
	gene00664	-1.44463		0.031408
	gene28470	-1.44563		0.0307143
	gene28728	-1.44659		0.046964
	gene14766	-1.44741		0.0500052
	gene28394	-1.44794		0.0213184
	gene05181	-1.44999		0.00222982
	gene06735	-1.46034		0.0244818
	gene19074	-1.4604		0.0481211
	gene20221	-1.4606		0.0355177
	gene02270	-1.46357		0.00016116
	gene26407	-1.4662		0.00298646
	gene34547	-1.47247		0.0356298
	gene20101	-1.47325		0.0178972
	gene01582	-1.47946		0.0419434
	gene17809	-1.48144		0.0121412
	gene13349	-1.48314		0.0360717
	gene07080	-1.48351		0.0395312
	gene20284	-1.49602		0.0168171
	gene00610	-1.49663		0.0083592
	gene05732	-1.50297		0.00908911
	gene20886	-1.50698		0.0303142
	gene01524	-1.50999		0.013983
	gene29209	-1.51129		0.00163543
	gene21601	-1.51508		0.0363897
	gene08304	-1.51974		0.0285084
	gene20038	-1.51992		0.0368569
	gene16048	-1.52756		0.0117956
	gene04551	-1.53569		0.0154454
	gene29821	-1.53695		0.0247449
	gene14775	-1.54163		0.00103147
	gene02467	-1.54687		0.0330556
	gene01363	-1.54713		0.0235442
	gene02267	-1.54854		0.011414
	gene19834	-1.54971		0.0434692
	gene25860	-1.54973		0.0142983
	gene09098	-1.55481		0.0447909
	gene19405	-1.55993		0.00918386
	gene27117	-1.56526		0.0491232
	gene14388	-1.56742		0.0435338
	gene13811	-1.5678		0.00638331
	gene02183	-1.5736		0.00444353
	gene09763	-1.57404		0.0178593
	gene19213	-1.57595		0.0153694
	gene03290	-1.57892		0.0317354
	gene09761	-1.58248		0.00725021
	gene20908	-1.58654		0.00733511
	gene26460	-1.58672		0.0150836
	gene21579	-1.59327		0.00933565
	gene11802	-1.59328		0.0151636
	gene02052	-1.59339		0.019048
	gene28020	-1.60197		0.00769411
	gene10539	-1.60312		0.014957
	gene19808	-1.60764		0.0478823
	gene30961	-1.61117		0.0330599
	gene03085	-1.6169		0.037088
	gene06301	-1.62125		0.040137
	gene05877	-1.62685		0.0395178
	gene03554	-1.6274		0.0021002
	gene16963	-1.62775		0.00405437
	gene28569	-1.63578		0.0255885
	gene32109	-1.63659		0.000462528
	gene13372	-1.64301		0.00915449
	gene08496	-1.64312		0.019839
	gene12216	-1.65031		0.000716699
	gene34868	-1.65194		0.0305464
	gene23674	-1.65527		0.0178938
	gene11123	-1.65594		0.0413085
	gene23040	-1.65784		0.0148139
	gene17021	-1.66643		0.0237877
	gene12900	-1.66711		0.0021214
	gene10292	-1.66849		0.0415777
	gene22713	-1.67461		0.0372812
	gene08817	-1.67698		0.00112565
	gene23278	-1.67873		0.0215338
	gene03747	-1.68678		0.035738
	gene31521	-1.68989		0.0219394
	gene28825	-1.69253		0.00802344
	gene09045	-1.70326		0.0183013
	gene11421	-1.70568		0.0275937
	gene19340	-1.71121		0.00967258
	gene29504	-1.71238		0.0258225
	gene22584	-1.71496		0.0236126
	gene27891	-1.7178		0.0181874
	gene24890	-1.72006		0.0400768
	gene15264	-1.72101		0.038356
	gene00960	-1.72371		0.015638
	gene05723	-1.73107		0.000898049
	gene14171	-1.75027		0.00570116
	gene30161	-1.75593		0.0189361
	gene30202	-1.7615		0.0459578
	gene12243	-1.76302		0.0136252
	gene01244	-1.77584		0.00224973
	gene10423	-1.79259		0.000146848
	gene30993	-1.79274		0.0130041
	gene12502	-1.79732		0.041753
	gene05544	-1.807		0.0142854
	gene07407	-1.80914		0.0267945
	gene31726	-1.80966		0.0168755
	gene21313	-1.81455		0.0124079
	gene02684	-1.81813		0.0461649
	gene15769	-1.83223		0.0202986
	gene14853	-1.83308		0.0373353
	gene26926	-1.83398		0.0261715
	gene23429	-1.83978		0.0132544
	gene06110	-1.84588		0.0168293
	gene05391	-1.84848		0.0485366
	gene17323	-1.84987		0.0198879
	gene05625	-1.85104		0.013021
	gene07406	-1.85714		0.00764362
	gene29747	-1.8653		0.0143276
	gene20957	-1.86579		0.0474223
	gene08553	-1.86633		0.0458014
	gene04470	-1.8674		0.022621
	gene21466	-1.86754		0.0352371
	gene26715	-1.86811		0.0317558
	gene11399	-1.87649		0.00986629
	gene20123	-1.87659		0.03354
	gene18208	-1.87741		0.00524023
	gene28462	-1.88379		0.00215032
	gene16571	-1.88638		0.0216732
	gene00201	-1.88787		0.0303043
	gene08833	-1.89354		0.0240432
	gene17760	-1.90402		0.0398929
	gene15313	-1.91394		0.0412511
	gene32450	-1.91653		0.00486119
	gene23619	-1.91779		0.0163313
	gene04285	-1.91978		0.022001
	gene22095	-1.91989		0.0451541
	gene09430	-1.92239		0.0219468
	gene13698	-1.929		0.0439529
	gene21845	-1.93299		0.0397891
	gene15597	-1.9429		0.0455428
	gene32312	-1.95108		0.0196219
	gene18831	-1.95886		0.0286215
	gene06858	-1.96258		0.0119331
	gene21703	-1.97922		0.0447649
	gene01294	-1.98061		0.0342469
	gene14096	-1.98256		0.00932673
	gene20283	-1.98561		0.0244011
	gene06583	-1.98958		0.00130978
	gene28374	-1.99644		0.00962495
	gene08631	-1.9988		0.0133872
	gene31379	-2.01564		0.0441203
	gene22665	-2.01927		0.049897
	gene08953	-2.02205		0.0201619
	gene18224	-2.02206		0.0219107
	gene05778	-2.02751		0.0193898
	gene25045	-2.02925		0.0371541
	gene22019	-2.03683		0.000110076
	gene20145	-2.03709		0.00708266
	gene17999	-2.03848		0.0405597
	gene35218	-2.04833		0.0419166
	gene30275	-2.0493		0.0455813
	gene12675	-2.05		0.00370818
	gene26118	-2.05079		0.0202804
	gene26902	-2.05482		0.0357378
	gene25109	-2.0692		0.030684
	gene29348	-2.07752		0.0487241
	gene27358	-2.07891		0.0201144
	gene01555	-2.08206		0.0497165
	gene09453	-2.08233		0.0460041
	gene23586	-2.08371		0.0458855
	gene18727	-2.09221		0.00751224
	gene00701	-2.0968		0.0217964
	gene13981	-2.10076		0.0447654
	gene09696	-2.10557		0.0185545
	gene30516	-2.10779		0.0409425
	gene22304	-2.11213		0.0376906
	gene25996	-2.11369		0.027039
	gene27562	-2.11383		0.0306355
	gene31273	-2.11652		0.00962593
	gene20655	-2.12004		0.0338199
	gene26195	-2.12352		0.0342171
	gene02192	-2.12384		0.00877237
	gene16858	-2.12923		0.035415
[truncated: 145 more rows]

## Sheet: S. Table 5
	Supplemental Table 5. Functional category and annotation of differentially expressed F. vesca white and red fruits genes at 24 hpi following B. cinerea inoculation, based on MapMan. Fold change is presented . hpi, hour post inoculation.
	Category	Gene ID	Functional annotation	Fold change (log2)		P-value
				White	Red	White	Red
	Photosynthesis
	Light reaction
		gene34224	Chlorophyll a-b binding protein, chloroplastic, Precursor (similar to)	1.218		0.0311322
		gene21826	Ferredoxin-3, chloroplastic (Fd III), Precursor (putative)	0.849		0.0150212
		gene24657	Oxygen-evolving enhancer protein 3, chloroplastic (OEE3), Precursor (putative)	-2.338		0.0412693
		gene25766	Na(+)-translocating NADH-quinone reductase subunit F (Na(+)-translocating NQR subunit F) (probable)	-2.222		0.0167624
		gene26715	PsbP-like protein 1, chloroplastic, Precursor (similar to)	-1.868		0.0317558
		gene10292	Thylakoid lumenal protein At1g03610, chloroplastic, Precursor (similar to)	-1.668		0.0415777
	Photrespiration
		gene25841	Glyoxylate reductase (probable)	0.817		0.00269998
		gene05391	Peroxisomal (S)-2-hydroxy-acid oxidase (GOX) (similar to)	-1.848		0.0485366
		gene05574	Serine hydroxymethyltransferase, mitochondrial (SHMT), Precursor (similar to)	-1.352		0.0104679
	Calvin cycle
		gene03904	Transketolase, chloroplastic (TK), Precursor (similar to)	0.992		4.66766e-05
		gene18538	Phosphoglycerate kinase, chloroplastic, Precursor (putative)	0.873		0.00558972
		gene18539	Phosphoglycerate kinase, cytosolic (putative)	0.84		0.000437956
		gene30155	Fructose-bisphosphate aldolase cytoplasmic isozyme (putative)	0.836		0.000788505
		gene09622	Phosphoglycerate kinase (probable)	-2.2		0.00890353
	CHO metabolism
	Synthesis
		gene08940	Glycogenin-2 (GN-2) (probable)	1.895		0.0188974
		gene24748	Glycogen synthase (probable)	1.26042		0.00154626
		gene10422	Probable galactose-1-phosphate uridyl transferase (putative)	0.911		0.00210302
		gene09493	Mannose-1-phosphate guanyltransferase alpha (probable)	-1.399		6.28768e-05
		gene08646	1,4-alpha-glucan-branching enzyme (similar to)	-1.205		0.000609203
	Degradation
		gene21228	Beta-fructofuranosidase, soluble isoenzyme I, Precursor (similar to)	1.013		0.0128571
		gene10422	Probable galactose-1-phosphate uridyl transferase (putative)	0.911		0.00210302
		gene06720	Beta-amylase (probable)	-1.104		0.0112324
	Trehalose
		gene24860	Alpha,alpha-trehalose-phosphate synthase [UDP-forming] 1 (AtTPS1) (putative)	1.995		0.0206132
		gene15859	Probable alpha,alpha-trehalose-phosphate synthase [UDP-forming] 7 (AtTPS7) (putative)	1.073		0.0257439
		gene28316	Beta-amylase, Precursor (similar to)	0.868		0.000697629
	Myo-inositol
		gene16378	Inositol-3-phosphate synthase (MI-1-P synthase)	1.126		0.0494594
		gene11353	Inositol oxygenase 2 (MI oxygenase 2) (putative)	-3.037		0.00316414
		gene00865	Inositol oxygenase 1 (MI oxygenase 1) (similar to)		-0.888		0.0309143
	Callose
		gene17913	Callose synthase 5 (similar to)	-2.673		0.0394695
		gene24409	Callose synthase 9 (similar to)	-2.096	2.332	0.00276967	0.00522078
		gene28728	Callose synthase 7 (similar to)	-1.447		0.046964
		gene26782	Callose synthase 2 (similar to)		1.433		0.00353722
		gene24411	Callose synthase 3 (putative)		0.837		0.00981026
	Sugar kinases
		gene26910	Xylulose kinase (Xylulokinase) (probable)	-0.956		0.00889594
	Others
		gene18361	Probable NAD(P)H-dependent oxidoreductase 1	0.878		0.00693519
		gene00617	Probable NAD(P)H-dependent oxidoreductase 1 (putative)	-3.154		0.022086
		gene28785	Uncharacterized oxidoreductase At1g06690, chloroplastic, Precursor (similar to)	-1.068		0.0304591
		gene28489	Probable galactinol--sucrose galactosyltransferase 5 (similar to)		1.854		0.0265716
		gene11912	Isoamylase 3, chloroplastic (AtISA3), Precursor (putative)		0.937		0.000626784
		gene31164	Sucrose-phosphate synthase 2 (putative)		1.37		0.0258865
		gene24265	Glucose-1-phosphate adenylyltransferase small subunit, chloroplastic, Precursor		0.844		0.00231207
		gene18627	Granule-bound starch synthase 1, chloroplastic/amyloplastic (GBSS-I), Precursor (putative)		-1.151		0.0123478
	Cell wall
	Precursor synthesis
		gene06827	UDP-glucuronic acid decarboxylase 1 (UXS-1) (similar to)	1.475		0.0450854
		gene10606	UDP-glucuronic acid decarboxylase 1 (UXS-1) (similar to)	0.915		0.000316461
		gene32285	UDP-glucuronate 4-epimerase 3 (putative)	0.913		0.000347414
	Cellulose synthesis
		gene20547	Cellulose synthase-like protein E6 (similar to)	1.201	2.123	0.00850225	0.000252236
		gene29698	Cellulose synthase A catalytic subunit 8 [UDP-forming] (AtCesA8) (similar to)	1.055		0.0319539
		gene04236	COBRA-like protein 4, Precursor (similar to)	-2.406		0.025825
	Degradation
		gene20439	BURP domain-containing protein 3 (OsBURP03), Precursor (probable)	2.905		0.0143185
		gene21638	Polygalacturonase (PG), Precursor (similar to)	1.521		0.0361534
		gene31030	Rhamnogalacturonate lyase (Rhamnogalacturonase), Precursor (probable)	1.342		0.0284776
		gene17555	Probable pectate lyase 20, Precursor (similar to)	1.33		0.0113507
		gene32087	Endoglucanase 6, Precursor (similar to)/ Endo-1,4-beta glucanase	1.175		0.00844224
		gene05501	Mannan endo-1,4-beta-mannosidase 4, Precursor (similar to)	1.005		0.00839432
		gene24370	Probable pectate lyase 1, Precursor (similar to)	0.938	0.921	0.030885	0.0340713
		gene08290	Polygalacturonase (PG), Precursor (similar to)	0.889		0.0168835
		gene23429	Probable pectate lyase 12, Precursor (similar to)	-1.84		0.0132544
		gene05877	Probable polygalacturonase At1g80170 (PG), Precursor (similar to)	-1.627		0.0395178
		gene30789	Polygalacturonase (PG), Precursor (probable)	-1.262	1.664	0.0063346	0.00547439
		gene24966	Rhamnogalacturonate lyase (Rhamnogalacturonase), Precursor (probable)		2.22		0.0428917
		gene20575	Long-chain-fatty-acid--CoA ligase 5 (LACS 5) (probable)		1.586		0.0135718
		gene24524	Polygalacturonase At1g48100 (PG), Precursor (probable)		1.524		0.044315
		gene23005	Polygalacturonase At1g48100 (PG), Precursor (similar to)		-0.877		0.0406168
	Modification
		gene02221	Expansin-A4 (AtEXPA4)/ Pectinmethylesterase3	1.664		0.0134387
		gene13718	Probable xyloglucan endotransglucosylase/hydrolase protein 30 (At-XTH30), Precursor (similar to)	1.314		0.0281221
		gene00661	Probable xyloglucan endotransglucosylase/hydrolase protein 33 (At-XTH33), Precursor (putative)		-2.346		0.00356691
		gene05591	Probable xyloglucan endotransglucosylase/hydrolase protein 6 (At-XTH6), Precursor (similar to)		-1.886		0.0402923
	Pectinesterases
		gene05463	Pectinesterase 3 (PE 3)/ Expansin-A6	1.249		0.00553851
		gene17879	Pectinesterase 51 (PE 51), Precursor (putative)	0.823		0.036962
		gene31599	Probable pectinesterase 29 (PE 29), Precursor	-1.183		0.0114603
		gene10629	Pectinesterase 41 (PE 41), Precursor (putative)		2.86		0.0288883
		gene21249	Pectinesterase 2 (PE 2), Precursor (putative)		2.045		0.0242373
		gene27697	Protein notum homolog, Precursor (probable)		1.503		0.00372709
		gene12105	Pectinesterase 20 (PE 20), Precursor (putative)		1.232		0.0468221
	Lipid metabolism
	Fatty acid synthesis
		gene21537	Acyl-[acyl-carrier-protein] desaturase, chloroplastic, Precursor (putative)	1.277		0.00874356
		gene32451	Putative peroxisomal-coenzyme A synthetase (probable)	1.235		0.0163303
		gene04304	Biotin carboxyl carrier protein of acetyl-CoA carboxylase 2, chloroplastic (BCCP-2), Precursor (similar to)	1.216		0.00227887
		gene29063	3-ketoacyl-CoA synthase 19 (KCS-19) (putative)	1.109	1.506	0.00950212	0.00236023
		gene32240	3-oxoacyl-[acyl-carrier-protein] synthase III, chloroplastic (KAS III), Precursor (putative)	1.031		0.0214601
		gene30963	3-ketoacyl-CoA synthase 11 (KCS-11) (putative)	0.869		0.000833216
		gene28189	Malonyl CoA-acyl carrier protein transacylase, mitochondrial (MCT), Precursor (probable)	0.841		0.0133461
		gene08148	Putative acyl-CoA synthetase yngI (probable)	0.84		0.0194657
		gene17105	Tetraacyldisaccharide 4'-kinase (probable)	-0.994		0.00356055
		gene20573	Long-chain-fatty-acid--CoA ligase 5 (LACS 5) (probable)		3.567		0.0490483
		gene22077	Biotin carboxylase (probable)		2.728		0.00178613
		gene08691	3-ketoacyl-CoA synthase 10 (KCS-10) (similar to)		1.324		0.00754034
		gene22539	Long-chain-fatty-acid--CoA ligase 1 (LACS 1) (probable)		0.852		0.00120279
	Fatty acid desaturation
		gene14626	Palmitoyl-monogalactosyldiacylglycerol delta-7 desaturase, chloroplastic, Precursor (similar to)	1.714	2.167	0.00222001	0.000385022
		gene23900	Palmitoyl-monogalactosyldiacylglycerol delta-7 desaturase, chloroplastic, Precursor (similar to)		1.742		3.04992e-05
		gene20183	Inositolphosphorylceramide-B C-26 hydroxylase (IPC-B hydroxylase) (probable)		1.493		0.00915746
	Phospholipid synthesis
		gene18829	Glycerol-3-phosphate acyltransferase 6 (AtGPAT6) (similar to)	1.249	2.307	0.0229677	0.00159515
		gene27576	Ethanolamine kinase (probable)	-1.094		0.0359113	0
		gene09386	Phosphoethanolamine N-methyltransferase 1 (PEAMT 1) (similar to)		1.763		0.00159873
		gene19231	Diacylglycerol kinase (DAG kinase) (probable)		-2.461		0.0404182
	Exotics (steroids, squalenes, etc)
		gene15082	hypothetical protein	0.992	-0.943	0.0152794	0.00809476
		gene11750	Elongation of fatty acids protein 2 (probable)	0.945		0.0318744	0
		gene32304	Putative C-4 methylsterol oxidase DDB_G0269788 (probable)	0.882		0.000956861	0
		gene09098	Non-specific lipid-transfer protein-like (probable)	-1.555		0.0447909	0
		gene16762	UDP-sugar-dependent glycosyltransferase 52 (probable)		1.033		0.0438701
	Lipid degradation
		gene32366	Phospholipase D beta 1 (AtPLDbeta1) (similar to)	0.891		0.0334929
		gene22761	1-phosphatidylinositol phosphodiesterase (PI-PLC), Precursor (probable)	-4.383		0.00794167
		gene13811	Alanine--glyoxylate aminotransferase 2 homolog 2, mitochondrial, Precursor (similar to)	-1.568		0.00638331
		gene01363	Glycerophosphodiester phosphodiesterase gde1 (probable)	-1.547		0.0235442
		gene32359	Phospholipase D beta 1 (AtPLDbeta1) (similar to)		3.357		0.0191074
		gene09114	Lipase (ROL), Precursor (probable)		2.252		0.0129942
		gene26222	Lipase member K, Precursor (probable)		1.071		0.0289583
		gene32361	Phospholipase D gamma 2 (AtPLDgamma2) (similar to)		-1.711		0.0158152
		gene01771	Homeotic protein ocelliless (probable)		-1.407		0.000267559
		gene11389	Probable phospholipase A2 homolog 1, Precursor (similar to)		-0.988		0.0382385
	Glycolipid synthesis
		gene31719	Probable monogalactosyldiacylglycerol synthase 3, chloroplastic (OsMGD3), Precursor (similar to)		-0.949		0.0198214
	Amino acid metabolism
	Synthesis
		gene26275	D-3-phosphoglycerate dehydrogenase, chloroplastic (3-PGDH), Precursor (similar to)	1.38		0.0146851
		gene04420	Cystathionine gamma-synthase, chloroplastic (CGS), Precursor (putative)	1.173		0.0169292
		gene07514	Threonine synthase, chloroplastic (TS), Precursor (similar to)	1.078		0.00624769
		gene16261	Phospho-2-dehydro-3-deoxyheptonate aldolase 2, chloroplastic, Precursor (putative)	1.076		0.000196106
		gene09305	Glutamate decarboxylase (GAD) (putative)	0.868		0.00423387
		gene30524	Glutamate decarboxylase 1 (GAD 1) (putative)		1.44089		0.00576791
		gene32450	Probable serine racemase	-1.917		0.00486119
		gene13811	Alanine--glyoxylate aminotransferase 2 homolog 2, mitochondrial, Precursor (similar to)	-1.568		0.00638331
	Degradation
		gene26130	Isoaspartyl peptidase/L-asparaginase 1 subunit beta, Precursor (putative)	-1.06		0.0236606
		gene03806	Proline dehydrogenase, mitochondrial, Precursor (putative)	-0.972		0.0483797
		gene28873	Probable 3-hydroxyisobutyrate dehydrogenase, mitochondrial (HIBADH), Precursor (similar to)	-0.926		0.00336891
		gene01897	Embryogenesis-associated protein EMB8 (similar to)	1.55		0.0144726
		gene19995	Urease accessory protein ureD (probable)	-1.231		0.0123645
	Secondary metabolism
	Isoprenoids
		gene20295	Ent-copalyl diphosphate synthase, chloroplastic (Ent-CDP synthase), Precursor (similar to)	2.47		0.031746
		gene13195	Beta-carotene hydroxylase (probable)	1.03		0.00175934
		gene17114	3-hydroxy-3-methylglutaryl-coenzyme A reductase 2 (HMG-CoA reductase 2) (putative)	1.025		0.00955275
		gene12147	Leucine-rich repeat and IQ domain-containing protein 1/ Geranyl geranyl transferase type-2sub unit alpha1	0.885		0.00269804
		gene27140	Prenyl transferase (similar to)	0.809		0.0222619
		gene32183	1-deoxy-D-xylulose 5-phosphate reductoisomerase, chloroplastic (1-deoxyxylulose-5-phosphate reductoisomerase), Precursor (similar to)	-0.839		0.0139674
		gene12609	(+)-delta-cadinene synthase isozyme A (D-cadinene synthase A)/ (-)-germacrene D synthase		1.851		0.013378
		gene18138	Carotenoid isomerase, chloroplastic (CrtISO), Precursor (putative)		1.466		0.0436424
		gene31674	Phytoene synthase, chloroplastic, Precursor (putative)		1.142		0.0453927
	Phenlypropanoids
		gene08635	Vinorine synthase (probable)	3.466	1.626	0.00579865	0.0191257
		gene13673	4-coumarate--CoA ligase-like 6 (At4CL7) (putative)	2.421		0.0425823	0
		gene34068	Anthranilate N-benzoyltransferase protein 1 (probable)	1.954		0.00183662	0
		gene09753	Phenylalanine ammonia-lyase 1 (putative)	1.535	1.722	0.00422854	0.00233104
		gene12577	4-coumarate--CoA ligase 2 (4CL 2) (putative)		1.268		0.019192
	N miscellaneous
		gene18240	Heat shock cognate 70 kDa protein 1 (Hsc70.1) (similar to)		-1.458		0.0139243
		gene13067	Adipocyte plasma membrane-associated protein (probable)		-1.134		0.00309856
	Sulfur containing
		gene08900	3-isopropylmalate dehydratase small subunit (IPMI) (probable)	0.816		0.00722809	0
		gene27892	3-isopropylmalate dehydratase (AtIIL1), Precursor (putative)		2.678		0.0471605
	Wax
		gene19766	Probable long-chain-alcohol O-fatty-acyltransferase 5	1.875	1.169	0.0232586	0.0171492
		gene19767	Long-chain-alcohol O-fatty-acyltransferase (probable)	1.314		0.0173994
		gene19765	Long-chain-alcohol O-fatty-acyltransferase (probable)	1.172		0.000737479
		gene03099	Protein WAX2 (probable)		2.214		0.000258638
		gene03105	Protein WAX2 (probable)		1.59		0.00534499
	Flavonoids
		gene25258	Isoflavone reductase homolog (similar to)	2.144		0.0194068
		gene26825	Chalcone synthase 2	1.535	1.406	0.0086766	0.0168743
		gene32066	Leucoanthocyanidin reductase (LAR) (probable)	1.492		0.0136659
		gene23367	Chalcone--flavonone isomerase 1 (Chalcone isomerase 1)	1.347	1.471	0.000882241	0.000508837
		gene15174	Bifunctional dihydroflavonol 4-reductase/flavanone 4-reductase (DFR) (putative)	1.304		0.00521778
		gene26826	Chalcone synthase 2	1.279	1.452	0.00210348	0.00097921
		gene21346	Chalcone--flavonone isomerase (Chalcone isomerase) (probable)	1.21	0.935	0.0110494	0.0441322
		gene29348	Anthocyanin 5-aromatic acyltransferase (5AT) (probable)	-2.078		0.0487241
		gene03747	Dihydroflavonol-4-reductase (DFR) (probable)	-1.687		0.035738
		gene26445	Dihydroflavonol-4-reductase (DFR) (probable)	-1.202		0.0276879
		gene04261	Anthocyanin 5-aromatic acyltransferase (5AT) (probable)	-1.055		0.0175235
		gene15176	Bifunctional dihydroflavonol 4-reductase/flavanone 4-reductase (DFR) (similar to)		1.577		0.0304461
		gene14611	Naringenin,2-oxoglutarate 3-dioxygenase (F3H) (putative)	1.287	1.155	0.0193364	0.0371027
		gene02203	Bifunctional dihydroflavonol 4-reductase/flavanone 4-reductase (DFR) (probable)		1.092		0.0017711
		gene32347	Leucoanthocyanidin dioxygenase (LDOX)/Anthocyanidin synthase (putative)		1.656		0.00826933
	Simple phenols
		gene24296	Putative laccase-9, Precursor (probable)	2.725		0.0207092
		gene27557	Putative laccase-9, Precursor (probable)	1.632		0.0309206
		gene12086	Putative laccase-9, Precursor (probable)	1.587	2.045	0.00429108	0.00624066
		gene17621	Laccase-15, Precursor (probable)	-0.876		0.0127171
		gene07465	Laccase-12, Precursor (putative)		2.127		0.0442769
		gene31737	L-ascorbate oxidase (Ascorbase), Precursor (putative)		1.714		0.0153364
		gene18694	Laccase-6, Precursor (similar to)		-0.865		0.00613028
	Hormone signaling
	Auxin
		gene17473	Auxin-induced in root cultures protein 12, Precursor (probable)	2.079		0.000247234
		gene10286	Probable indole-3-acetic acid-amido synthetase GH3.5 (OsGH3-5)	1.801		0.0335831
		gene14224	Protein NLRC3 (CLR16.2) (probable)	1.074		0.0192373
		gene03935	Auxin-induced protein X10A (probable)	1.006		0.00170056
		gene15613	IAA-amino acid hydrolase ILR1, Precursor (similar to)	0.867		0.00212987
		gene10566	Putative indole-3-acetic acid-amido synthetase GH3.9 (AtGH3-9)	-3.086		0.0254501
		gene31273	Stem-specific protein TSJT1 (probable)	-2.117		0.00962593
		gene08496	Indole-3-acetic acid-induced protein ARG7 (similar to)	-1.643		0.019839
		gene13768	Indole-3-acetic acid-induced protein ARG7 (similar to)	-0.842		0.0304607
		gene12066	Transport inhibitor response 1-like protein (TIR1-like protein) (putative)		0.904		0.0290608
		gene01689	Auxin-induced protein X10A (similar to)		-0.987		0.00351838
		gene05542	Auxin-binding protein ABP19a, Precursor (putative)	1.553		0.0245039
		gene05631	Auxin-binding protein ABP19a, Precursor (putative)	0.982		0.0398744
		gene16569	Auxin-responsive protein IAA4 (putative)	-5.367		0.00285499
		gene23280	Auxin response factor 18 (putative)	-3.213		0.00327446
		gene16571	Auxin-responsive protein IAA16 (similar to)	-1.886		0.0216732
		gene27891	Auxin-responsive protein IAA13 (similar to)	-1.718		0.0181874
		gene26830	Auxin-responsive protein IAA8 (similar to)	-1.016		0.00690035
		gene08194	Auxin-induced protein AUX28 (putative)		1.446		0.015253
		gene12224	Auxin response factor 19 (similar to)		1.29		0.00379117
		gene30394	Auxin response factor 6 (similar to)		1.196		0.00105867
		gene02234	Auxin response factor 17 (probable)		1.107		0.041098
		gene29730	Auxin-repressed 12.5 kDa protein (putative)	-3.799		0.00252993
		gene28374	Auxin-induced protein 5NG4 (probable)	-1.996		0.00962495
		gene18208	Auxin-induced protein 5NG4 (probable)	-1.877		0.00524023
		gene21466	Auxin-induced protein 5NG4 (probable)	-1.868		0.0352371
		gene11123	Auxin transporter-like protein 3 (putative)	-1.656		0.0413085
		gene14094	Auxin response factor 15 (probable)	-2.428		0.00509342
		gene17580	Auxin response factor 7 (probable)	3.607		0.0366885
	Abscisic acid
		gene31335	9-cis-epoxycarotenoid dioxygenase (NCED1), chloroplastic, Precursor (putative)	1.862		0.0023108
		gene30616	9-cis-epoxycarotenoid dioxygenase (NCED1), chloroplastic, Precursor (similar to)	1.388		0.00535963
		gene24031	Zeaxanthin epoxidase (ZEP), chloroplastic, Precursor (similar to)	0.978		0.0234331
		gene01374	GEM-like protein 5 (similar to)	0.822		0.0233719
		gene17426	GLABRA2 expression modulator (similar to)	-2.339		0.0383277
		gene08833	Carotenoid 9,10(9',10')-cleavage dioxygenase 1 (probable)	-1.894		0.0240432
		gene10539	B3 domain-containing transcription factor LEC2 (similar to)	-1.603		0.014957
		gene15316	HVA22-like protein i (AtHVA22i) (similar to)		-2.862		0.00867096
	Ethylene
		gene08891	1-aminocyclopropane-1-carboxylate (ACC) oxidase homolog 1 (similar to)	2.978		0.00398464
		gene11421	1-aminocyclopropane-1-carboxylate (ACC) oxidase (putative)	-1.706		0.0275937
		gene15503	1-aminocyclopropane-1-carboxylate (ACC) oxidase homolog 1 (probable)	-1.106		0.00759021
		gene01735	1-aminocyclopropane-1-carboxylate (ACC) oxidase homolog 1 (similar to)		1.689		0.0241489
		gene22074	1-aminocyclopropane-1-carboxylate (ACC) oxidase homolog (probable)		1.244		0.00990256
		gene08892	1-aminocyclopropane-1-carboxylate (ACC) oxidase homolog (similar to)		1.925		0.0483381
	Jasmonate
		gene25082	12-oxophytodienoate reductase 2 (OPDA-reductase 2) (similar to)	1.344		0.00298161
		gene03869	Allene oxide cyclase 3, chloroplastic, Precursor (putative)	1.037		0.00980418
		gene05824	Lipoxygenase 5, chloroplastic (AtLOX5) (putative)	-0.915		0.0374966
		gene15528	Nitrile-specifier protein 5 (AtNSP5) (putative)	-0.801		0.0184056
		gene25080	12-oxophytodienoate reductase 1 (OPDA-reductase 1) (similar to)		1.74		0.0366634
		gene22519	Lipoxygenase A (putative)		0.854		0.0445138
	Cytokinin
		gene06080	tRNA Delta(2)-isopentenylpyrophosphate transferase (IPP transferase) (probable)		1.729		0.0260238
		gene15204	Cytokinin dehydrogenase 5 (CKO5), Precursor (similar to)		1.363		0.0415967
	Giberrelin
		gene14841	Gibberellin 3-beta-dioxygenase 4 (AtGA3ox4) (probable)	4.266	2.666	0.0145849	0.0347287
		gene20295	Ent-copalyl diphosphate synthase, chloroplastic (Ent-CDP synthase), Precursor (similar to)	2.47		0.031746
		gene00710	Snakin-2, Precursor (similar to)		-2.797		0.0360091
		gene02539	Snakin-1, Precursor (putative)		-2.35		0.00674332
		gene28358	Snakin-2, Precursor (similar to)		-1.643		0.00655892
		gene07935	Gibberellin 2-beta-dioxygenase 8 (probable)	1.856		0.00739628
		gene05020	Gibberellin 2-beta-dioxygenase 2 (putative)	-2.318		0.0222975
		gene19320	Gibberellin 3-beta-dioxygenase 4 (AtGA3ox4) (probable)	-2.311		0.0210564
	Stress
	Biotic stress
		gene15030	Chitotriosidase-1, Precursor (probable)	3.533		0.0100359
		gene32301	Probable disease resistance protein At4g27220	2.784	1.472	0.000667213	0.0285007
		gene16763	Putative syntaxin-24 (AtSYP24) (probable)	2.431		0.0340201
		gene13147	Lysozyme, Precursor (similar to)	1.73		0.0217107
		gene18826	Putative syntaxin-24 (AtSYP24) (probable)	1.49	-1.116	0.00415737	0.00707938
		gene14601	Thaumatin-like protein 1, Precursor (similar to)	1.286		0.00384354
		gene20954	Receptor-like protein kinase At3g21340, Precursor (similar to)		0.958		0.0285034
		gene32423	Osmotin-like protein OSM34, Precursor (similar to)	1.219		0.0143361
		gene13684	Disease resistance protein RPM1 (probable)	0.945	0.918	0.049179	0.0448286
		gene04894	hypothetical protein	0.848		0.0055103
		gene12900	Cyclic nucleotide-gated ion channel 1 (AtCNGC1) (probable)	-1.667		0.0021214
		gene19405	Protein transport Sec1a (AtSec1a) (similar to)	-1.56		0.00918386
		gene16048	Myosin heavy chain, clone 203 (probable)	-1.528		0.0117956
		gene23931	Disease resistance response protein 206/ Dirigent 11	-1.371		0.0285891
		gene26650	Putative disease resistance protein At3g14460 (probable)	-1.335	1.478	0.0162552	0.0300869
		gene23932	Disease resistance response protein 206/ Dirigent 23	-1.31		0.0347783
		gene16734	Putative disease resistance protein RGA1 (probable)	-1.291		0.0277134
		gene28332	Probable disease resistance RPP8-like protein 2	-1.241		0.0263839
		gene35140	Putative disease resistance RPP13-like protein 1 (probable)	-1.197		0.0390274
		gene05872	Apoptotic protease-activating factor 1 (Apaf-1) (probable)	-1.143	2.197	0.0188216	0.00423321
		gene04409	Putative disease resistance protein RGA3 (probable)	-1.019		0.00258033
		gene34124	Putative disease resistance RPP13-like protein 1 (probable)	-0.942	0.972	0.00566406	0.0254736
		gene04301	Putative disease resistance protein RGA3 (probable)	-0.937		0.00893036
		gene01229	Probable disease resistance protein At5g66900	-0.923	0.913	0.0112413	0.025549
		gene25628	Putative disease resistance protein At3g14460 (probable)		2.307		0.0206211
		gene34116	Putative disease resistance RPP13-like protein 1 (probable)		2.074		0.000850838
		gene34123	Putative disease resistance RPP13-like protein 1 (probable)		1.945		0.0227891
		gene30565	Pathogenesis-related protein PR-4B, Precursor (similar to)		1.927		0.0219763
		gene18440	Putative disease resistance protein RGA3 (probable)		1.771		0.0130195
		gene15978	Leucine-rich repeat-containing protein 7 (probable)		1.714		0.0164325
		gene15723	Probable alpha,alpha-trehalose-phosphate synthase [UDP-forming] 3 (AtTPS3)		1.505		0.0285198
		gene30283	Putative syntaxin-24 (AtSYP24) (probable)		1.481		0.0369926
		gene04541	Putative disease resistance protein At3g14460 (probable)		1.19		0.035814
		gene25023	Putative disease resistance RPP13-like protein 1 (probable)		1.143		0.0266598
		gene01628	Enhanced disease susceptibility 5 (Eds5) (similar to)		1.077		0.00171683
		gene26511	Putative disease resistance RPP13-like protein 1 (probable)		0.913		0.0442405
		gene20118	60S ribosomal protein L27a-2 (similar to)		-1.063		0.00235011
		gene13057	Disease resistance response protein 206 (probable)	1.838	1.537	3.86256e-05	0.000250454
		gene06560	Putative disease resistance protein At4g10780 (probable)	-0.974		0.00906
		gene23388	Putative disease resistance protein At5g47280 (probable)		-2.041		0.0289083
		gene34200	TIR-NBS type disease resistance protein (probable)		1.538		0.0474041
	Biotic stress: Signaling
		gene28541	MLO-like protein 3 (AtMlo3) (probable)	0.898	0.815	0.0201366	0.0298707
		gene13403	Cysteine and histidine-rich domain-containing protein 1 (probable)		-0.894		0.00311656
	Biotic stress: PR-proteins
		gene23960	Disease resistance response protein 206/ Dirigent 2	6.054		0.0453148
		gene03058	TMV resistance protein N (probable)	-2.605	2.401	0.0252996	0.0376995
		gene24787	TMV resistance protein N (similar to)	-2.465		0.0196224
		gene02401	TMV resistance protein N (similar to)	-2.409		0.020556
		gene20655	TMV resistance protein N (similar to)	-2.12		0.0338199
		gene01294	TMV resistance protein N (probable)	-1.981		0.0342469
		gene31994	TMV resistance protein N (similar to)	-1.965	1.843	0.00193752	0.00571147
		gene24446	Formin-like protein 20 (AtFH20) (similar to)	-1.655	1.705	0.00882638	0.0166845
		gene13372	TMV resistance protein N (probable)	-1.643		0.00915449
		gene05732	Probable disease resistance protein At5g66900	-1.503		0.00908911
		gene16053	TMV resistance protein N (probable)	-1.167		0.00403767
		gene16534	TMV resistance protein N (probable)	-1.009	1.132	0.0106996	0.0256555
		gene04856	TMV resistance protein N (probable)	-0.9		0.0331656	0
		gene14188	TMV resistance protein N (probable)		2.334		0.00785855
		gene09920	TMV resistance protein N (similar to)		2.035		0.0376822
		gene24401	TMV resistance protein N (similar to)		1.958		0.024774
		gene24089	Probable disease resistance protein At5g66900		1.816		0.0335592
		gene29744	TMV resistance protein N (similar to)		1.452		0.0133372
		gene24102	Probable disease resistance protein At5g66910		1.428		0.00102606
		gene08354	TMV resistance protein N (similar to)		1.173		0.0358742
		gene23846	TMV resistance protein N (probable)		1.033		0.0195143
		gene18674	TMV resistance protein N (probable)		-1.401		0.0463406
		gene24449	TMV resistance protein N (probable)		1.077		0.0442781
		gene14587	TMV resistance protein N (similar to)		0.877		0.0490897
		gene24813	TMV resistance protein N (similar to)		1.01		0.0485082
		gene33936	Disease resistance protein At4g27190 (probable)		0.944		0.0491584
		gene17137	TMV resistance protein N (probable)		0.874		0.0297272
	Abiotic stress
		gene06044	Cryptochrome-1 (probable)	1.69	1.345	0.0157832	0.0291832
	Abiotic stress: Heat
		gene20877	17.8 kDa class I heat shock protein (putative)	2.417	4.463	0.0314668	0.00310703
		gene07901	18.1 kDa class I heat shock protein (putative)	2.018		0.00813658
		gene15418	17.9 kDa class II heat shock protein (putative)	1.83	1.805	0.0115193	0.0142917
		gene13189	Heat shock protein 83 (similar to)	1.534	-2.134	0.000311213	7.07659e-06
		gene08959	23.6 kDa heat shock protein, mitochondrial (AtHsp23.6), Precursor (probable)	1.468		0.0162187
		gene03043	Heat shock cognate 70 kDa protein 2 (Hsc70.2) (similar to)	1.429	-1.279	0.00846798	0.0160995
		gene10105	Heat shock 70 kDa protein (putative)	1.425		0.00524413
		gene26629	Heat shock cognate 70 kDa protein 2 (putative)	1.245		0.0448937
		gene20885	18.1 kDa class I heat shock protein (AtHsp18.1) (putative)	1.138	1.99	0.0467501	0.0018208
		gene22159	Luminal-binding protein 4 (BiP 4), Precursor (similar to)	0.979		0.0474658
		gene28462	Chaperone protein dnaJ (similar to)	-1.884		0.00215032
		gene08537	Chaperone protein dnaJ 11, chloroplastic (AtJ11), Precursor (probable)	-0.991		0.0384981
		gene16482	DnaJ homolog subfamily B member 11, Precursor (probable)	-0.968		0.0295926
		gene09177	17.5 kDa class I heat shock protein (probable)	-0.877	-1.084	0.0166711	0.00544717
		gene07771	18.5 kDa class I heat shock protein (putative)		5.061		0.020329
		gene07767	17.5 kDa class I heat shock protein (putative)		3.612		0.00986767
		gene06706	Heat shock 70 kDa protein, mitochondrial, Precursor (similar to)		2.699		0.0177482
		gene13096	DnaJ protein homolog 1 (DROJ1) (probable)		1.917		0.0396906
		gene00799	Chaperone protein dnaJ (probable)		1.739		0.0482932
		gene30932	DnaJ homolog subfamily C member 13 (RME-8) (probable)		1.137		0.0221414
		gene20979	PHD finger protein At5g26210 (similar to)		0.885		0.0419945
		gene21218	23.6 kDa heat shock protein, mitochondrial (AtHsp23.6), Precursor (probable)		-2.314		0.000544404
		gene13191	Heat shock protein 83 (putative)		-1.636		0.0068432
		gene01470	Chaperone protein dnaJ 11, chloroplastic (AtJ11), Precursor (probable)		-1.418		0.00407617
		gene13651	Chaperone protein dnaJ (probable)		-1.322		0.0161479
		gene04521	Heat shock protein 83 (probable)		-1.318		0.00028448
		gene26540	Heat shock cognate 70 kDa protein 2 (similar to)		-1.266		0.0365495
		gene01495	Heat shock protein 81-2 (HSP81-2) (putative)		-1.117		0.0218284
		gene29751	DnaJ homolog subfamily B member 1 (Heat shock protein 40) (probable)		-1.036		0.0118255
		gene14172	18.2 kDa class I heat shock protein (similar to)		-1.17		0.0157506
		gene32258	Heat shock protein STI (GmSTI) (similar to)	0.855	-1.268	0.0159878	0.0015251
		gene23137	DnaJ protein homolog 2 (similar to)		-0.857		0.0232405
	Abiotic stress: Cold
		gene03543	N-(5-amino-5-carboxypentanoyl)-L-cysteinyl-D-valine synthase (ACV synthetase) (probable)	0.975		0.0236466
		gene18733	hypothetical protein	-1.294		0.00191169
		gene24713	Structural protein ORF567 (probable)		1.714		0.00445254
		gene26519	Glycine-rich protein 2b (AtGRP2b) (probable)		1.022		0.0479962
	Abiotic stress: Drought/Salt
		gene05181	Protein DEHYDRATION-INDUCED 19 homolog 4 (AtDi19-4) (probable)	-1.45		0.00222982	0
		gene00655	Sentrin-specific protease 2 (Axam) (probable)	-0.845		0.0187272	0
		gene00230	Retinitis pigmentosa 1-like 1 protein (probable)		-1.275		0.00245262
	Abiotic stress: Unspecified
		gene05542	Auxin-binding protein ABP19a, Precursor (putative)	1.553		0.0245039
		gene05631	Auxin-binding protein ABP19a, Precursor (putative)	0.982		0.0398744
		gene25040	Mucin-1 subunit beta, Precursor (probable)	0.866		0.00876723
		gene04560	U3 small nucleolar RNA-associated protein 10 (probable)	-3.686		0.00803998
		gene26195	Titin (probable)	-2.124		0.0342171
		gene25208	PGAP2-interacting protein (probable)	-1.21		0.016947
		gene03721	Universal stress protein A-like protein (probable)	-0.814		0.00719621
		gene23653	Germin-like protein subfamily 3 member 2, Precursor (putative)		-1.878		0.0460105
	Miscellaneous
		gene29108	Epoxide hydrolase 2 (SEH) (probable)	0.855		0.0210869
		gene05723	Formamidase (probable)	-1.731		0.000898049
		gene05724	Formamidase (probable)	-1.186		0.0026446
		gene07747	D-3-phosphoglycerate dehydrogenase (PGDH) (probable)	-0.951		0.0258772
		gene16326	Xyloglucan galactosyltransferase KATAMARI1 (probable)		2.319		0.00535056
		gene27357	Cytokinin-O-glucosyltransferase 2 (AtZOG2) (similar to)		1.778		0.00583241
		gene09619	Cytokinin-O-glucosyltransferase 2 (AtZOG2) (probable)		1.632		0.000728999
		gene07876	Anthocyanidin 3-O-glucosyltransferase 1 (probable)		0.828		0.0339194
		gene03873	hypothetical protein		-0.99		0.020983
		gene20721	Anthocyanidin 3-O-glucosyltransferase (probable)		-0.823		0.0276532
	UDP glucosyl and glucoronyl transferases
		gene16131	ATP synthase gamma chain (probable)	4.251		0.00116278
		gene26265	Limonoid UDP-glucosyltransferase (Limonoid glucosyltransferase) (putative)	2.4		0.00828661
		gene12591	Anthocyanidin 3-O-glucosyltransferase 2 (putative)	1.942		0.00829832
		gene04355	Anthocyanidin 5,3-O-glucosyltransferase (probable)	1.737	1.321	0.003628	0.0194988
		gene00094	Cytokinin-O-glucosyltransferase 3 (AtZOG3) (probable)	1.597	1.924	0.0014827	0.000260734
		gene20726	Anthocyanidin 3-O-glucosyltransferase (probable)	1.246		0.0188476
		gene04357	Anthocyanidin 5,3-O-glucosyltransferase (probable)	1.199	1.551	0.00522904	0.00106188
		gene26342	Anthocyanin 3'-O-beta-glucosyltransferase (3'GT) (probable)	1.147		0.0148475
		gene13529	Cytokinin-O-glucosyltransferase 3 (AtZOG3) (probable)	0.915		0.000617125
		gene15079	Glycosyltransferase 8 domain-containing protein 1 (probable)	0.905		0.0146034
		gene06599	Indole-3-acetate beta-glucosyltransferase 1 (probable)	0.901		0.00596665
		gene00126	Anthocyanin 3'-O-beta-glucosyltransferase (3'GT) (putative)	0.899		0.0352308
		gene22709	Anthocyanidin 3-O-glucosyltransferase 1 (probable)	0.824		0.00439419
		gene26344	Anthocyanin 3'-O-beta-glucosyltransferase (3'GT) (putative)	0.817		0.0131692
		gene13530	Flavonol-3-O-glycoside-7-O-glucosyltransferase 1 (probable)	0.808		0.0169709
		gene10135	hypothetical protein	-2.912		0.00759401
		gene13488	UDP-N-acetylglucosamine transferase subunit ALG13 homolog (probable)	-1.083		0.0365994
		gene08835	Multiple exostoses homolog 1 (probable)	-1.018		0.0393188
		gene25795	hypothetical protein	-0.953	0.964	0.0181964	0.0183122
		gene20880	Cytokinin-N-glucosyltransferase 2 (probable)	-0.858	1.347	0.037441	0.00849082
		gene18991	Transmembrane protein, Precursor (probable)	-0.834	1.421	0.00924423	0.00106873
		gene24493	Glycosyltransferase QUASIMODO1 (probable)	-0.822		0.0225142
	Gluco-, galacto- and mannosidases
		gene32087	Endoglucanase 6, Precursor (similar to)	1.175		0.00844224
		gene20640	Beta-glucosidase 12 (AtBGLU12), Precursor (putative)	-2.767		0.00667242
		gene20103	Alpha-glucosidase, Precursor (similar to)	-2.513		0.0480602
		gene06528	Beta-galactosidase 9 (Lactase 9), Precursor (similar to)	-2.136	1.15	0.0146523	0.0286524
		gene15210	Beta-galactosidase 5 (Lactase 5), Precursor (similar to)	-1.001		0.0469341
		gene12626	Beta-galactosidase (Lactase), Precursor (putative)	-0.959		0.00331866
		gene23065	Beta-galactosidase 1 (Lactase 1), Precursor (putative)		0.872		0.00321293
	Beta 1,3 glucan hydrolases
		gene21072	Glucan endo-1,3-beta-glucosidase 8 ((1->3)-beta-glucanase 8), Precursor (putative)	1.21		0.000580222
		gene29858	Glucan endo-1,3-beta-glucosidase 6 ((1->3)-beta-glucanase 6), Precursor (putative)	0.881		0.0457707
		gene24890	Glucan endo-1,3-beta-glucosidase 1 ((1->3)-beta-glucanase 1), Precursor (similar to)	-1.72		0.0400768
		gene22713	Glucan endo-1,3-beta-glucosidase-like protein At1g69295, Precursor (probable)	-1.675		0.0372812
		gene27049	Glucan endo-1,3-beta-glucosidase 6 ((1->3)-beta-glucanase 6), Precursor (similar to)		1.051		0.0427775
	O-methyl transferases
		gene00960	Caffeic acid 3-O-methyltransferase 1 (CAOMT-1) (probable)	-1.724		0.015638
		gene09396	(RS)-norcoclaurine 6-O-methyltransferase (6-OMT) (probable)		-1.319		0.0186986
	Oxidases - copper, flavone etc
		gene17408	Putative quinone-oxidoreductase homolog, chloroplastic	1.514		0.046881
		gene09879	Primary amine oxidase, Precursor (similar to)	1.485		0.041468
		gene28406	Quinone oxidoreductase-like protein At1g23740, chloroplastic, Precursor (similar to)	1.481		0.0324879
		gene17090	Probable flavin-containing monooxygenase 1	-2.967		0.0113901
		gene15221	Lysine-specific histone demethylase 1 homolog 1 (probable)		1.463		0.00998832
		gene29468	Probable polyamine oxidase 5 (AtPAO5) (putative)		-1.031		0.0313846
	Nitrilases
		gene20169	Reticuline oxidase-like protein, Precursor (similar to)	0.913		0.0132498
		gene20178	Reticuline oxidase-like protein, Precursor (probable)		0.902		0.0438616
	Glutathione S transferases
		gene10550	Glutathione S-transferase (similar to)	1.136		0.0237042
		gene07779	Probable glutathione S-transferase parC (putative)	-3.439		0.0276005
		gene25990	Glutathione S-transferase 103-1A (probable)	-3.274		0.0192064
		gene02725	Probable glutathione S-transferase (putative)		3		0.037388
	Cytochrome P450
		gene01896	Cytochrome P450 78A3 (putative)	3.296		0.000887468
		gene30586	Probable cytochrome P450 524A1	2.412		0.0104011
		gene22676	Cytochrome P450 71A26 (putative)	2.344		0.0129917
		gene17416	Cytochrome P450 82A3 (probable)	1.924		0.0139883
		gene13399	Cytochrome P450 704C1 (probable)	1.216		0.0410219
		gene25801	Flavonoid 3'-monooxygenase (similar to)	1.151	1.157	0.0040417	0.0114102
		gene34073	Cytochrome P450 750A1 (probable)	1.103		0.0150441
		gene29021	Cytochrome P450 716B1 (putative)	1.041		0.00469591
		gene02514	Isoflavone 2'-hydroxylase (probable)	1.039		0.0346366
		gene04238	Cytochrome P450 85A (similar to)	-2.358		0.00392847
		gene28569	Abscisic acid 8'-hydroxylase 4 (ABA 8'-hydroxylase 4) (putative)	-1.636		0.0255885
		gene20358	Cytochrome P450 93A3 (similar to)	-1.203		0.0195121
		gene13397	Cytochrome P450 704C1 (probable)	-1.199		0.0364269
		gene18592	Licodione synthase (probable)	-1.185		0.0485961
		gene32514	Cytochrome P450 86A2 (putative)		2.22		0.028092
		gene10425	Cytochrome P450 71A4 (probable)		2.205		0.0242264
		gene13602	Secologanin synthase (SLS) (probable)		1.533		0.0444998
		gene15183	Abscisic acid 8'-hydroxylase 1 (ABA 8'-hydroxylase 1) (probable)		1.492		0.0251243
		gene10015	Cytochrome P450 71A22 (similar to)		1.135		0.0424566
		gene34611	Cytochrome P450 71A1 (probable)		1.071		0.0247356
		gene32398	Cytochrome P450 87A3 (similar to)		-1.605		0.0281447
	Alcohol dehydrogenases
		gene12556	Alcohol dehydrogenase-like 1 (probable)		0.996		0.0271797
	Peroxidases
		gene28142	Cationic peroxidase 1, Precursor (putative)	2.766	3.161	0.0499273	0.0129823
		gene10758	Peroxidase 20 (Atperox P20), Precursor (similar to)	-1.267		0.0222907
		gene05105	Peroxidase 29 (Atperox P29), Precursor (probable)		2.507		0.0114421
		gene00894	Lignin-forming anionic peroxidase, Precursor (similar to)		2.322		0.0181593
		gene01331	Peroxidase 55 (Atperox P55), Precursor (putative)		-1.44		0.0147845
	Protease inhibitor
		gene00606	Non-specific lipid-transfer protein 4.1 (LTP 4.1), Precursor (probable)		-2.64		0.0320027
	Acid and other phosphatases
		gene20908	hypothetical protein	-1.587		0.00733511
	Myrosinases-lectin-jacalin
		gene15528	Nitrile-specifier protein 5 (AtNSP5) (putative)	-0.801		0.0184056
	Plastocyanin-like
		gene17100	Early nodulin-like protein 2, Precursor (similar to)	1.525		0.0172115
	Protease inhibitor/seed storage/lipid transfer protein (LTP) family protein
		gene16092	Non-specific lipid-transfer protein-like protein At5g64080, Precursor (similar to)	1.362		0.00516562
		gene20871	Probable non-specific lipid-transfer protein 2 (LTP 2), Precursor	-2.311		0.00702142
		gene20408	Non-specific lipid-transfer protein-like protein At2g13820, Precursor (probable)	-1.358		0.0167459
	Short chain dehydrogenase/reductase (SDR)
		gene25061	3-oxoacyl-[acyl-carrier-protein] reductase (probable)	1.264		0.00469683
		gene25939	Momilactone A synthase (OsMAS) (probable)	1.223		0.0244522
		gene06565	Short-chain type dehydrogenase/reductase (similar to)	1.189		0.0393913
		gene32506	WW domain-containing oxidoreductase (probable)	-2.914		0.0369484
		gene22570	Glucose and ribitol dehydrogenase (similar to)	-2.725		0.0257551
		gene32504	WW domain-containing oxidoreductase (probable)	-0.984		0.00236045
		gene19099	(+)-neomenthol dehydrogenase (AtSDR1) (putative)		0.981		0.00257087
		gene04520	WW domain-containing oxidoreductase (probable)		-2.075		0.0013296
	GCN5-related N-acetyltransferase
		gene00689	hypothetical protein	-1.01		0.0301445
		gene21644	N-acetyltransferase 9 (similar to)		-0.875		0.0151944
	GDSL-motif lipase
		gene08561	GDSL esterase/lipase EXL3 (Family II lipase EXL3), Precursor (putative)	1.582		0.0213197
		gene16712	GDSL esterase/lipase At5g33370, Precursor (putative)	-2.349		0.0413614
		gene05443	GDSL esterase/lipase 1, Precursor (similar to)	-1.218		0.0441066
		gene34694	Esterase, Precursor (putative)	-0.907		0.0418464
		gene03597	GDSL esterase/lipase At5g14450, Precursor (similar to)	0.917		0.00842787
	Other Ferredoxins and Rieske domain
		gene24815	Pheophorbide a oxygenase, chloroplastic (Pheide a oxygenase), Precursor (probable)		2.08		0.0102407
	RNA
	Processing
		gene07064	Major allergen Pru ar 1 (putative)	2.524	1.531	0.00352985	0.0152095
		gene05122	Major allergen Pru av 1 (putative)	2.156		0.00302818
		gene07065	Major allergen Pru av 1 (putative)	1.763		0.00854801
		gene05123	Major allergen Pru av 1 (putative)	1.616		0.019216
		gene07088	Major allergen Pru av 1 (putative)	1.453		0.0252573
		gene15903	Probable CCR4-associated factor 1 homolog 11	1.2		0.0461895
		gene08737	Calcium homeostasis endoplasmic reticulum protein (probable)	0.865		0.00323595
		gene21845	Poly(A) polymerase beta (PAP-beta) (probable)	-1.933		0.0397891
		gene07080	Major allergen Pru av 1 (similar to)	-1.484		0.0395312
		gene29865	Splicing factor 3B subunit 1 (SF3b155) (probable)	-1.291		0.0204109
		gene22625	Merozoite surface protein CMZ-8 (probable)	-1.22		0.0130835
		gene25954	Nuclear ribonuclease Z (RNase Z) (putative)	-1.179		0.0128759
		gene16957	Probable helicase DDB_G0274399	-1.124	2.177	0.0394311	0.00512636
		gene01682	Exosome complex exonuclease RRP41 (similar to)	-0.911		0.00830693
		gene25287	DEAD-box ATP-dependent RNA helicase 46 (similar to)		3.073		0.00976946
		gene07078	Major allergen Pru ar 1 (probable)		2.127		0.0210767
		gene00224	Ribonuclease-like storage protein, Precursor (probable)		1.109		0.0421382
		gene15481	Endoribonuclease Dicer homolog 3a (OsDCL3a) (probable)		1.044		0.0341892
		gene20610	Poly(A)-specific ribonuclease PARN (AtPARN) (probable)		0.94		0.0415584
		gene16174	mRNA cap guanine-N7 methyltransferase 1 (similar to)		-1.454		0.00245965
		gene16169	mRNA cap guanine-N7 methyltransferase 1 (similar to)		-1.166		0.015647
		gene00699	hypothetical protein		-1.123		0.0164277
		gene14353	Splicing factor U2af small subunit A (U2 snRNP auxiliary factor small subunit A) (similar to)		-0.946		0.00664117
	Transcription
		gene06770	Myosin-3 (MHC A) (probable)	1.127		0.0138804
		gene31251	Serine-rich adhesin for platelets, Precursor (probable)	-1.368		0.0262065
		gene09549	Transcription initiation factor IIB-2 (AtTFIIB2) (probable)	-1.119		0.0125318
		gene14535	DNA-directed RNA polymerase II subunit RPB1 (RNA polymerase II subunit B1) (similar to)	-0.954		0.0276668
		gene26738	DNA-directed RNA polymerase I subunit rpa1 (RNA polymerase I subunit A1) (probable)		1.811		0.0465079
		gene14534	DNA-directed RNA polymerase II subunit RPB1 (RNA polymerase II subunit B1) (similar to)		1.007		0.0249458
		gene03320	DNA-directed RNA polymerases I, II, and III subunit rpabc4 (RNA polymerases I, II, and III subunit ABC4) (probable)		-1.241		0.00730622
		gene31716	UPF0293 protein C16orf42 homolog (probable)		-0.924		0.0160058
	Regulation of transcription
		gene14058	Agamous-like MADS-box protein AGL62 (probable)	3.16		0.00758583
		gene08006	Transcription factor MYB98 (AtMYB98) (similar to)	2.508		0.024078
		gene18470	Probable transcriptional regulator RABBIT EARS (similar to)	2.395		0.0356324
		gene17698	Ethylene-responsive transcription factor ERF053 (probable)	2.225		0.0153928
		gene18104	Myb-like protein G (probable)	2.048		0.0457941
		gene32084	Ethylene-responsive transcription factor ERF061 (probable)	1.914		0.00146812
		gene23830	Transcription factor HEC1 (bHLH 88) (similar to)	1.847		0.039032
		gene26022	Dof zinc finger protein DOF3.3 (AtDOF3.3) (probable)	1.458		0.0112762
		gene13212	Scarecrow-like protein 8 (AtSCL8) (similar to)	1.435		0.00293737
		gene00377	Ethylene-responsive transcription factor WRI1 (similar to)	1.402		0.0422839
		gene08000	Gastrula zinc finger protein XlCGF26.1 (probable)	1.317		0.0155283
		gene16196	U-box domain-containing protein 26 (probable)	1.293		0.0303772
		gene26135	Dof zinc finger protein DOF5.4 (AtDOF5.4) (similar to)	1.275		0.00252682
		gene32629	Transcription factor RF2b (similar to)	1.259		0.0146827
		gene06047	DNA (cytosine-5)-methyltransferase DRM2 (similar to)	1.244		0.0443157
		gene19411	Probable S-acyltransferase At3g60800 (putative)	1.227		0.00344051
		gene24577	Transcription factor bHLH95 (bHLH 95) (probable)	1.203	1.606	0.00481289	0.00143407
		gene15119	Zinc finger protein MAGPIE (similar to)	1.153		0.00795663
		gene18542	Transcription factor bHLH53 (bHLH 53) (probable)	1.149		0.0325869
		gene27383	Zinc finger protein CONSTANS-LIKE 5 (probable)	1.109		0.00202037
		gene13037	DNA (cytosine-5)-methyltransferase 1 (DNA Metase AthI) (putative)	1.058		0.00365455
		gene20865	BEL1-like homeodomain protein 9 (BEL1-like protein 9) (probable)	1.039		0.00954522
		gene30350	Transcription initiation factor TFIID subunit 1-A (AtTAF1a) (probable)	0.999		0.0282324
		gene13743	Putative Myb family transcription factor At1g14600 (probable)	0.991		0.0298674
		gene05064	Transcription factor bHLH148 (bHLH 148) (probable)	0.963		0.00124096
		gene24434	Bromodomain-containing protein C1450.02 (probable)	0.921		0.0487857
		gene13301	Heat stress transcription factor B-2a (AtHsfB2a) (probable)	0.908	-1.035	0.0474537	0.0181668
		gene32520	AT-rich interactive domain-containing protein 4A (RBBP-1) (probable)	0.904		0.00648907
		gene19367	B3 domain-containing protein REM9 (probable)	0.897		0.0406696
		gene22621	Protein gar2 (probable)	0.89		0.0499928
		gene03365	Ras GTPase-activating protein-binding protein 1 (probable)	0.878		0.00421548
		gene24887	Homeobox-leucine zipper protein ATHB-40 (probable)	0.846		0.0135081
		gene01197	Probable WRKY transcription factor 2 (putative)	0.839		0.0423327
		gene25223	Remorin (probable)	0.838		0.0232299
		gene21934	Proliferating cell nuclear antigen (PCNA) (similar to)	0.8		0.0131238
		gene16569	Auxin-responsive protein IAA4 (putative)	-5.367		0.00285499
		gene32187	Dof zinc finger protein DOF5.6 (AtDOF5.6) (probable)	-4.354		0.00268687
		gene23541	Nuclear transcription factor Y subunit B-2 (AtNF-YB-2) (similar to)	-3.529		0.00566248
		gene01997	Myb-related protein Myb4 (similar to)	-3.439		0.00820484
		gene23280	Auxin response factor 18 (putative)	-3.213		0.00327446
		gene03742	Zinc finger protein CONSTANS-LIKE 16 (probable)	-2.803		0.0105118
		gene12474	U3 small nucleolar ribonucleoprotein protein IMP4 (U3 snoRNP protein IMP4) (probable)	-2.802		0.0181469
		gene30740	Zinc finger protein CONSTANS-LIKE 10 (probable)	-2.786		0.00885205
		gene14072	Myb-like protein X (probable)	-2.581		0.0272287
		gene14810	Zinc finger CCCH domain-containing protein 53 (OsC3H53) (probable)	-2.34		0.0308419
		gene13326	TraB domain-containing protein (probable)	-2.174	2.348	0.0171851	0.0341305
		gene26118	Developmental protein SEPALLATA 1 (probable)	-2.051		0.0202804
		gene22095	NAC domain-containing protein 68 (ONAC068) (probable)	-1.92		0.0451541
		gene16571	Auxin-responsive protein IAA16 (similar to)	-1.886		0.0216732
		gene27891	Auxin-responsive protein IAA13 (similar to)	-1.718		0.0181874
		gene22584	Nuclear transcription factor Y subunit C-9 (AtNF-YC-9) (putative)	-1.715		0.0236126
		gene03554	mTERF domain-containing protein 1, mitochondrial, Precursor (probable)	-1.627		0.0021002
		gene23172	Probable S-acyltransferase At5g05070 (similar to)	-1.627	0.835	0.000330417	0.0272832
		gene06301	MADS-box transcription factor 17 (probable)	-1.621		0.040137
		gene03290	Phenylalanyl-tRNA synthetase beta chain (PheRS) (probable)	-1.579		0.0317354
		gene28394	Homeobox-leucine zipper protein HAT5 (HD-ZIP protein 5) (probable)	-1.448		0.0213184
		gene06873	ATP-dependent Clp protease proteolytic subunit 2, mitochondrial, Precursor (similar to)	-1.439		0.0301276
		gene03235	Two-component response regulator ARR2 (probable)	-1.305		0.0366821
		gene20104	Vacuolar protein sorting-associated protein 2 homolog 2 (AtVPS2-2) (similar to)	-1.305		0.00708452
		gene05160	Calmodulin-binding transcription activator 5 (EICBP.f) (similar to)	-1.297	1.597	0.0173928	0.0192214
		gene15096	Methyltransferase-like protein 2 (putative)	-1.29		0.0343796
		gene13280	Remorin (similar to)	-1.271	-1.707	0.0299331	0.02664
		gene12818	Dof zinc finger protein DOF4.6 (AtDOF4.6) (probable)	-1.186		0.00286671
		gene22965	Hydrophobic protein LTI6B (similar to)	-1.145		0.0125436
		gene19196	Histone-lysine N-methyltransferase ATX3 (TRX-homolog protein 3) (similar to)	-1.112	1.506	0.0163718	0.00330048
		gene07491	Putative pentatricopeptide repeat-containing protein At5g06400, mitochondrial, Precursor (probable)	-1.096		0.025431
		gene19128	Transcription elongation factor B polypeptide 3 (EloA) (probable)	-1.078	1.197	0.0406247	0.0323284
		gene18108	Zinc finger CCCH domain-containing protein 21 (AtC3H21) (similar to)	-1.074		0.0293089
		gene22092	NAC domain-containing protein 2 (ANAC002) (probable)	-1.07		0.00589474
		gene28785	Uncharacterized oxidoreductase At1g06690, chloroplastic, Precursor (similar to)	-1.068		0.0304591
		gene08853	Homeobox-leucine zipper protein HAT4 (HD-ZIP protein 4) (similar to)	-1.059		0.022814
		gene12077	WD and tetratricopeptide repeats protein 1 (probable)	-1.034		0.0178081
		gene08175	Zinc finger and SCAN domain-containing protein 29 (probable)	-1.03		0.016304
		gene20863	LIM and UIM domain-containing At1g19270 (probable)	-1.025		0.0167481
		gene26830	Auxin-responsive protein IAA8 (similar to)	-1.016		0.00690035
		gene12765	Homeobox-leucine zipper protein ATHB-12 (probable)	-1.007		0.0111436
		gene11979	Transcription factor TGA3 (AtbZIP22) (similar to)	-1.007		0.0157535
		gene28516	hypothetical protein	-0.991		0.00372307
		gene22490	Transcription factor bHLH128 (bHLH 128) (probable)	-0.969		0.04961
		gene18583	BolA-like protein 2 (similar to)	-0.967		0.0273677
		gene19709	Myb family transcription factor APL (AtAPL) (putative)	-0.871		0.0364411
		gene28942	Homeobox-leucine zipper protein ATHB-14 (similar to)	-0.847		0.0478252
		gene19866	Myb family transcription factor APL (AtAPL) (similar to)	-0.818		0.00103362
		gene10484	Two-component response regulator-like APRR2 (probable)	-0.809	1.047	0.0227162	0.0174914
		gene28360	BAH and coiled-coil domain-containing protein 1 (probable)		2.802		0.00540942
		gene12658	Putative transcription factor bHLH041 (bHLH 41) (probable)		2.766		0.0314368
		gene17430	Transcription factor bHLH78 (bHLH 78) (probable)		1.795		0.00392866
		gene20347	Heat stress transcription factor A-6b (AtHsfA6b) (probable)		1.663		0.0277446
		gene04840	Chromodomain-helicase-DNA-binding protein 1-like (probable)		1.618		0.0149192
		gene20754	GATA transcription factor 14 (similar to)		1.548		0.043842
		gene17765	Zinc finger protein NUTCRACKER (putative)		1.449		0.0348957
		gene08194	Auxin-induced protein AUX28 (putative)		1.446		0.015253
		gene17608	E1A-binding protein p400 (mDomino) (probable)		1.368		0.013066
		gene14851	Chromodomain-helicase-DNA-binding protein 2 (CHD-2) (probable)		1.306		0.0115993
		gene12224	Auxin response factor 19 (similar to)		1.29		0.00379117
		gene30351	Transcription initiation factor TFIID subunit 1-A (AtTAF1a) (similar to)		1.272		0.0471582
		gene23883	Probable histone-lysine N-methyltransferase ATXR3 (TRX-related protein 3) (similar to)		1.256		0.0364848
		gene28393	Lysine-specific demethylase 5B (probable)		1.219		0.0171973
		gene20484	Histone-lysine N-methyltransferase, H3 lysine-9 specific SUVH6 (Su(var)3-9 homolog protein 6) (probable)		1.215		0.00853777
		gene30394	Auxin response factor 6 (similar to)		1.196		0.00105867
		gene10955	Zinc finger CCCH domain-containing protein 7 (AtC3H7) (similar to)		1.188		0.0488749
		gene28361	Dentin sialoprotein, Precursor (probable)		1.151		0.0147609
		gene14276	Doublesex- and mab-3-related transcription factor A1 (probable)		1.12		0.0070808
		gene22505	Zinc finger protein MAGPIE (similar to)		1.115		0.0115197
		gene02234	Auxin response factor 17 (probable)		1.107		0.041098
		gene06705	Transcription regulatory protein SNF2 (probable)		1.091		0.0469424
		gene10999	Histone-lysine N-methyltransferase trr (probable)		1.089		0.0318728
		gene31817	Homeobox protein BEL1 homolog (probable)		1.015		0.026078
		gene27007	Zinc finger CCCH domain-containing protein 30 (AtC3H30) (putative)		0.995		0.00477997
		gene16584	Probable WRKY transcription factor 74		0.983		0.0464086
		gene24904	Probable WRKY transcription factor 28		0.966		0.0357385
		gene00379	Protein ETHYLENE INSENSITIVE 3 (similar to)		0.954		0.0265584
		gene03712	Transcription factor MYB21 (AtMYB21) (similar to)		0.924		0.0170685
		gene14415	Zinc finger CCCH domain-containing protein 53 (OsC3H53) (probable)		0.897		0.0288508
		gene16867	2',3'-cyclic-nucleotide 2'-phosphodiesterase (probable)		0.89		0.0411083
		gene20979	PHD finger protein At5g26210 (similar to)		0.885		0.0419945
		gene05506	Histone acetyltransferase HAC1 (similar to)		0.878		0.0106416
		gene24358	Chromodomain-helicase-DNA-binding protein Mi-2 homolog (dMi-2) (probable)		0.866		0.0218752
		gene18383	Dof zinc finger protein DOF5.1 (AtDOF5.1) (similar to)		-2.919		0.0237692
		gene01886	DNA ligase (probable)		-2.851		0.0178927
		gene08952	Aspartic proteinase nepenthesin-2, Precursor (probable)		-1.806		0.00260944
		gene31056	Axial regulator YABBY 5 (similar to)		-1.746		0.0334347
		gene13351	Transcription factor TCP19 (probable)		-1.602		0.0452195
		gene09614	Transcription factor TCP15 (similar to)		-1.388		0.0025045
		gene16806	Zinc finger protein 706 (probable)		-1.305		0.00449445
		gene24027	Transcription factor MYB44 (AtMYB44) (probable)		-1.244		0.00562087
		gene30302	Aspartic proteinase nepenthesin-1, Precursor (probable)		-1.201		0.0348837
		gene23873	Ethylene-responsive transcription factor ERF010 (similar to)		-0.986		0.0115097
		gene23124	Charged multivesicular body protein 1 (probable)		-0.953		0.00111608
		gene28185	Zinc finger HIT domain-containing protein 1 homolog (probable)		-0.84		0.0376255
		gene08977	Transcription factor BTF3 homolog 4 (similar to)		-0.821		0.0436737
		gene22028	Histone-lysine N-methyltransferase ATX3 (TRX-homolog protein 3) (similar to)		-0.802		0.00764663
	RNA binding
		gene26698	33 kDa ribonucleoprotein, chloroplastic, Precursor (probable)	1.04		0.00238749
		gene21565	Ribonuclease 3 (RNase III) (probable)	0.882		0.00313622
		gene14171	Glycine-rich RNA-binding protein 2, mitochondrial (AtGRP2), Precursor (similar to)	-1.75		0.00570116
		gene29209	KH domain-containing protein At1g09660 (similar to)	-1.511		0.00163543
		gene20591	Ribosomal RNA small subunit methyltransferase B (probable)	-1.327		0.0253598
		gene05305	Nuclear and cytoplasmic polyadenylated RNA-binding protein PUB1 (Poly(U)-binding protein) (probable)	-1.018		0.0275474
		gene14624	hypothetical protein	-0.822		0.00830472
		gene31183	RNA-binding protein 24-B (similar to)		2.129		0.00397814
		gene20611	Ribosomal RNA small subunit methyltransferase B (probable)		1.437		0.0478071
		gene28708	Polyadenylate-binding protein 5 (Poly(A)-binding protein 5) (probable)		1.264		0.0356475
		gene06632	U11/U12 small nuclear ribonucleoprotein 35 kDa protein (U11/U12 snRNP 35 kDa protein) (probable)		0.857		0.0485738
		gene30367	KH domain-containing protein At4g18375 (probable)		0.852		0.00884678
		gene12696	hypothetical protein		-1.277		0.000366372
		gene03279	Nucleolin (probable)		-0.914		0.0136568
	DNA
	Synthesis/chromatin structure
		gene24659	Probable histone H2A.3 (similar to)	1.414		0.0444378
		gene23009	Putative AC transposase (probable)	1.335		0.00619458
		gene22163	Histone H2A.1 (similar to)	1.306		0.0155333
		gene29776	Histone H3.2 (putative)	1.294		0.0294354
		gene31106	Putative AC transposase (probable)	1.207		0.00477083
		gene29371	DNA topoisomerase 2 (similar to)	1.006		0.0432874
		gene01614	DNA replication licensing factor mcm4 (probable)	1.003		0.0469254
		gene26094	Replication protein A 70 kDa DNA-binding subunit (RP-A p70) (probable)	0.972		0.0239215
		gene08218	Histone H1.2 (similar to)	0.843	-1.131	0.031639	0.00690505
		gene21891	Condensin complex subunit 1 (probable)	0.821		0.0177853
		gene00701	DNA polymerase lambda (Pol Lambda) (probable)	-2.097		0.0217964
		gene19316	Putative AC9 transposase (probable)	-1.615	2.553	0.0410234	0.0247097
		gene30471	Nuclease S1, Precursor (probable)	-1.212		0.0315143
		gene14832	Replication factor C subunit 1 (A1 140 kDa subunit) (probable)	-1.211		0.0320939
		gene03607	Type I inositol-1,4,5-trisphosphate 5-phosphatase CVP2 (similar to)	-1.097		0.0197926
		gene30598	hypothetical protein	-1.015		0.0183605
		gene27476	5'-3' exonuclease (probable)	-0.995		0.0136046
		gene26063	RPE-spondin, Precursor (probable)	-0.904	-0.85	0.0328818	0.0148747
		gene24634	ATP-dependent DNA helicase Q1 (probable)	-0.889		0.0369357
		gene08776	Helicase POLQ-like (probable)		1.772		0.0131145
		gene21324	Structural maintenance of chromosomes protein 2-2 (AtSMC2-2) (similar to)		1.697		0.0357221
		gene25668	Putative AC9 transposase (similar to)		1.601		0.0296198
		gene31681	hypothetical protein		1.377		0.022746
		gene08719	Centromere-associated protein E (CENP-E) (probable)		1.072		0.0399225
		gene25803	Activating signal cointegrator 1 complex subunit 3 (similar to)		1.029		0.0195914
		gene09433	Probable ATP-dependent RNA helicase DHX36		0.873		0.0375265
		gene27761	Histone H2AX (putative)		-1.717		0.000170436
		gene25489	Histone H3.3		-1.189		0.00552342
		gene28081	Probable histone H2B.3 (similar to)		-0.87		0.00487019
	Repair
		gene10080	Probable GMP synthase [glutamine-hydrolyzing]	0.924		0.00477638
		gene19725	Probable GMP synthase [glutamine-hydrolyzing]	-2.532		0.00651374
		gene15459	Putative endonuclease FLJ39025 (probable)	-1.254		0.0413819
		gene11361	Meiotic nuclear division protein 1 homolog (AtMND1) (similar to)	-0.959		0.0116449
		gene21268	Cryptochrome DASH, chloroplastic/mitochondrial, Precursor (probable)	-0.819		0.0355378
		gene32302	Deoxyribodipyrimidine photo-lyase (similar to)		2.155		0.0143867
		gene19024	Putative late blight resistance protein homolog R1A-3 (probable)		1.426		0.0024164
		gene14199	General transcription factor 3C polypeptide 2 (probable)		1.433		0.0145742
		gene01635	Transcriptional activator DEMETER (probable)		1.291		0.0237055
	Unspecified
		gene02655	Exonuclease 3'-5' domain-containing protein 1 (probable)	-1.176		0.00893429	0
		gene15374	Oligoribonuclease (probable)	-1.05		0.00438028	0
	Protein
	AA activation
		gene31205	Histidyl-tRNA synthetase (HisRS) (similar to)	1.259		0.00867887
		gene21474	Valyl-tRNA synthetase (ValRS) (probable)	0.823		0.0263294
		gene07957	Lysyl-tRNA synthetase (LysRS) (similar to)		-3.122		0.0450208
		gene17041	Threonyl-tRNA synthetase, mitochondrial (ThrRS), Precursor (similar to)		-1.342		0.0242713
		gene04328	Tyrosyl-tRNA synthetase (TyrRS) (probable)		-0.918		0.0102931
		gene10169	Endothelial monocyte-activating polypeptide 2 (probable)		-0.887		0.0221592
	Synthesis
		gene29201	60S ribosomal protein L10 (similar to)	1.019		0.00253292
		gene27963	Elongation factor Tu, chloroplastic (EF-Tu), Precursor (similar to)	0.911		0.000185427
		gene28701	Ribosomal L1 domain-containing protein 1 (probable)	0.881		0.00151054
		gene03814	Gibberellin-regulated protein 4, Precursor (probable)	-3.139		0.00835696
		gene17021	Eukaryotic translation initiation factor 3 subunit E-B (eIF3e-B) (similar to)	-1.666		0.0237877
		gene02467	DNA ligase 1 (similar to)	-1.547		0.0330556
		gene11811	mRNA turnover protein 4 homolog (probable)	-1.018		0.00756488
		gene29247	60S ribosomal protein L30 (putative)	-0.994		0.00933188
		gene01214	60S ribosomal protein L32-1 (similar to)	-0.889		0.0393978
		gene00888	DEAD-box ATP-dependent RNA helicase 32 (similar to)	-0.848		0.00646616
		gene31543	Eukaryotic translation initiation factor 3 subunit A (eIF3a) (similar to)		1.009		0.0268264
		gene16707	Translational activator GCN1 (HsGCN1) (probable)		0.952		0.0244773
		gene05751	60S ribosomal protein L26-1 (putative)		-1.409		0.0039372
		gene05358	60S ribosomal protein L26-1 (putative)		-1.356		0.00549335
		gene25119	30S ribosomal protein S6 alpha, chloroplastic, Precursor (similar to)		-1.191		0.0275698
		gene03036	Putative 60S ribosomal protein L37a-1 (similar to)		-1.156		0.00199304
		gene12464	60S acidic ribosomal protein P1 (probable)		-1.1		0.00051953
		gene25115	60S ribosomal protein L27 (similar to)		-1.088		0.0470949
		gene30522	Putative H/ACA ribonucleoprotein complex subunit 1-like protein 1 (similar to)		-1.04		0.0210466
		gene08322	60S ribosomal protein L23		-1.035		0.0159433
		gene25247	40S ribosomal protein S25 (similar to)		-1.002		0.0098452
		gene21888	60S acidic ribosomal protein P2 (similar to)		-0.997		0.0216772
		gene24338	60S ribosomal protein L27 (similar to)		-0.993		0.0193038
		gene24881	60S ribosomal protein L32-1 (putative)		-0.991		0.0276014
		gene21570	60S ribosomal protein L12		-0.977		0.0334221
		gene03828	60S ribosomal protein L34 (putative)		-0.976		0.00948667
		gene28433	50S ribosomal protein L12-1, chloroplastic, Precursor (similar to)		-0.974		0.0360684
		gene09726	60S ribosomal protein L12 (similar to)		-0.959		0.013472
		gene25981	40S ribosomal protein S9-2 (similar to)		-0.956		0.00697304
		gene12328	Nucleolar phosphoprotein p130 (Nopp140) (probable)		-0.956		0.00216863
		gene10059	40S ribosomal protein S12 (similar to)		-0.951		0.035421
		gene18486	50S ribosomal protein L17 (similar to)		-0.94		0.00323469
		gene23119	60S ribosomal protein L28-1 (putative)		-0.934		0.00651866
		gene13418	Probable rRNA-processing protein EBP2 homolog (similar to)		-0.934		0.0020938
		gene08265	H/ACA ribonucleoprotein complex subunit 3-like protein (similar to)		-0.918		0.0106668
		gene15334	40S ribosomal protein S17 (similar to)		-0.914		0.0256024
		gene20127	60S ribosomal protein L8-3 (similar to)		-0.913		0.0110035
		gene25329	40S ribosomal protein S23		-0.912		0.0363546
		gene11132	40S ribosomal protein S5-2		-0.905		0.0216119
		gene20620	60S ribosomal protein L31 (similar to)		-0.901		0.0107585
		gene05155	60S ribosomal protein L29-1 (similar to)		-0.898		0.0287978
		gene02142	40S ribosomal protein S16		-0.893		0.0290679
		gene26004	60S ribosomal protein L34 (similar to)		-0.883		0.0469262
		gene08780	60S ribosomal protein L37-3 (similar to)		-0.882		0.0429545
		gene30245	60S acidic ribosomal protein P2 (similar to)		-0.881		0.0399942
		gene22275	60S ribosomal protein L27a-3 (putative)		-0.878		0.0335888
		gene17157	60S ribosomal protein L8-3 (similar to)		-0.875		0.0301145
		gene26171	H/ACA ribonucleoprotein complex subunit 2-like protein (putative)		-0.868		0.00270751
		gene11461	60S ribosomal protein L5 (similar to)		-0.867		0.0345019
		gene30528	40S ribosomal protein S11-1 (putative)		-0.862		0.0334698
		gene08275	60S ribosomal protein L14-2 (putative)		-0.852		0.0461476
		gene11089	60S ribosomal protein L19-1 (similar to)		-0.841		0.0419172
		gene18780	60S ribosomal protein L35a-1 (putative)		-0.835		0.0405825
		gene04306	40S ribosomal protein S19-1 (putative)		-0.834		0.0481724
		gene21330	40S ribosomal protein S26-1 (similar to)		-0.828		0.0221557
		gene15180	50S ribosomal protein L31, chloroplastic, Precursor (putative)		-0.803		0.043722
	Targeting
		gene29671	Peroxisomal targeting signal 2 receptor (PTS2 receptor) (probable)	1.578	-1.098	0.000658884	0.00777049
		gene21893	Mitochondrial import inner membrane translocase subunit Tim17 (putative)	0.954	-1.359	0.0118123	0.00128588
		gene07498	Mitochondrial import inner membrane translocase subunit tim23 (probable)	0.813	-1.43	0.0145483	0.000248055
		gene13490	Importin subunit beta-1 (PTAC97) (probable)	0.808		0.00158738	0
		gene17365	Pentatricopeptide repeat-containing protein At3g46870 (probable)	-4.184		0.000284641	0
		gene08953	Sec14 cytosolic factor (PI/PC TP) (probable)	-2.022		0.0201619	0
		gene19844	SEC14-like protein 1 (probable)	-1.358		0.0365992	0
		gene13277	Agamous-like MADS-box protein AGL15 (probable)	-1.015		0.0197517	0
		gene30262	Solute carrier family 35 member F2 (probable)		1.312		0.00344073
		gene12830	Importin subunit beta-1 (PTAC97) (probable)		1.1		0.00884415
		gene23733	Transportin-1 (MIP) (probable)		0.85		0.0269207
		gene22430	Probable importin-7 homolog		0.804		0.0163302
		gene11300	Mitochondrial import inner membrane translocase subunit Tim17 (similar to)		-1.687		0.000262741
		gene08088	Mitochondrial import inner membrane translocase subunit TIM44, Precursor (probable)		-0.846		0.0267834
	Postranslational modification
		gene19499	Protein STRUBBELIG-RECEPTOR FAMILY 8, Precursor (similar to)	1.453		0.0417667
		gene12072	Serine/threonine-protein kinase-like protein At1g28390 (similar to)	1.261		0.0196687
		gene23251	Probable LRR receptor-like serine/threonine-protein kinase At1g53420, Precursor	1.034		0.00147784
		gene21378	Myosin-11 (probable)	1.012		0.0113093
		gene12855	Probable protein phosphatase 2C 51 (OsPP2C51)	0.975		0.00146469
		gene00864	Phytosulfokine receptor 1 (DcPSKR1), Precursor (similar to)	0.884		0.0112385
		gene29996	Probable serine/threonine-protein kinase At1g18390, Precursor	0.85		0.00692074
		gene03575	Protein kinase G11A (similar to)	0.841		0.00621357
		gene25908	Probable LRR receptor-like serine/threonine-protein kinase At1g53420, Precursor	-2.907		0.0109292
		gene21601	Cyclic nucleotide-gated ion channel 1 (AtCNGC1) (similar to)	-1.515		0.0363897
		gene13972	Protein-tyrosine phosphatase-like member B (probable)	-1.341		0.0076602
		gene25725	Probable serine/threonine-protein kinase RLCKVII	-1.314		0.0296709
		gene22410	Kinetochore-associated protein KNL-2 homolog (HsKNL-2) (probable)	-1.269		0.017908
		gene05942	Dual specificity protein phosphatase 9 (MAP kinase phosphatase 4) (probable)	-1.15		0.0130517
		gene11969	Serine/threonine-protein kinase SAPK2 (putative)	-1.025	1.129	0.015705	0.0464146
		gene20346	Probable protein phosphatase 2C 51 (AtPP2C51) (similar to)	-0.918		0.00204758	0
		gene07736	Serine/threonine-protein kinase-like protein CCR4 (AtCCR4), Precursor (similar to)		3.667		0.00877789
		gene12512	Probable serine/threonine-protein kinase NAK (similar to)		2.714		0.0322353
		gene18254	Calcium-dependent protein kinase 1 (AtCDPK 1) (similar to)		2.348		0.0316548
		gene26593	Protein kinase APK1B, chloroplastic, Precursor (similar to)		1.7		0.0333395
		gene12641	Serine/threonine-protein kinase PBS1 (probable)		1.405		0.00689525
		gene13896	Phototropin-1 (putative)		1.214		0.0106636
		gene23103	Serine/threonine protein phosphatase 2A 55 kDa regulatory subunit B beta isoform (PP2A, subunit B, beta isoform) (similar to)		1.179		0.00447893
		gene27424	Serine/threonine-protein kinase ATM (AtATM) (probable)		1.094		0.0245474
		gene16208	Probable serine/threonine-protein kinase roco5		1.048		0.0166898
		gene24158	Cyclin-dependent kinase E-1 (CDKE) (putative)		0.914		0.0190077
		gene22513	5'-AMP-activated protein kinase subunit gamma-2 prkag (AMPK gamma-2 chain) (probable)		0.85		0.034177
		gene30942	Serine/threonine protein phosphatase 2A 57 kDa regulatory subunit B' iota isoform (PP2A, B' subunit, iota isoform) (putative)		0.814		0.0204359
		gene13799	Probable protein phosphatase 2C 73 (OsPP2C73) (similar to)		-2.455		0.0212369
		gene00688	Serine/threonine-protein kinase PBS1 (probable)		-1.456		0.0450193
		gene17519	Serine/threonine-protein kinase PBS1 (similar to)	2.226		0.0450963
		gene18600	Serine/threonine-protein kinase ATG1 (probable)	1.48		0.0403982
		gene21678	Serine/threonine-protein kinase-like protein ACR4 (AtCR4), Precursor (putative)	1.34		0.0106725
		gene10067	CBL-interacting serine/threonine-protein kinase 6 (putative)	0.94		0.00123846
		gene20972	Putative serine/threonine-protein kinase-like protein CCR3 (AtCRR3), Precursor	0.904		0.00689309
		gene31902	Serine/threonine-protein kinase SRK2E (SnRK2.6) (putative)	-1.024		0.00664546
		gene26503	Protein kinase APK1A, chloroplastic, Precursor (probable)		0.839		0.0350579
		gene24114	Probable serine/threonine-protein kinase NAK		0.836		0.0264463
		gene21679	Probable serine/threonine-protein kinase GCN2 (putative)		1.086		0.00924721
		gene29225	Probable serine/threonine-protein kinase At1g54610 (similar to)		1.509		0.000763163
		gene27368	Probable serine/threonine-protein kinase DDB_G0272254		1.285		0.0191127
		gene21968	Peptide methionine sulfoxide reductase (probable)		-0.83		0.0199624
	Degradation
		gene25416	Subtilisin-like protease, Precursor (probable)	2.507		0.0458341
		gene15632	F-box protein At2g27310 (probable)	1.915		0.000983615
		gene26835	hypothetical protein	1.557		0.0169246
		gene20062	Baculoviral IAP repeat-containing protein 7-A (xEIAP/XLX) (probable)	1.526		0.0152156
		gene00660	U-box domain-containing protein 19 (probable)	1.46		0.00811581
		gene12723	Probable RING-H2 finger protein ATL5G	1.447		0.0127314
		gene16196	U-box domain-containing protein 26 (probable)	1.293		0.0303772
		gene08729	F-box protein AFR (putative)	1.181		0.000185433
		gene32648	SKP1-interacting partner 15 (similar to)	1.099		0.00113102
		gene02223	Transcription factor MYB44 (AtMYB44) (similar to)	1.078		0.0476373
		gene03620	Putative F-box/LRR-repeat protein 23 (probable)	1.076		0.00154754
		gene19269	E3 ubiquitin-protein ligase At3g02290 (probable)	1.033		0.00230283
		gene13873	RING-H2 finger protein ATL5A (similar to)	0.965		0.001669
		gene00996	F-box/LRR-repeat protein 5 (similar to)	0.946		0.00103152
		gene31809	RING-H2 zinc finger protein RHA1b (probable)	0.936		0.00153184
		gene11228	Proteasome subunit beta type-3-A (putative)	0.93		0.0425398
		gene08482	Cysteine proteinase RD21a (RD21), Precursor (probable)	0.919		0.00193913
		gene19519	Postreplication repair E3 ubiquitin-protein ligase RAD18 (probable)	0.908		0.000318102
		gene05912	E3 ubiquitin-protein ligase At3g02290 (probable)	0.893		0.00864742
		gene08624	Cell division protease ftsH homolog, chloroplastic, Precursor (similar to)	0.88		0.0104981
		gene26143	Putative F-box protein At1g47790 (probable)	0.865		0.00122312
		gene18380	RING-H2 finger protein ATL2J (probable)	0.863		0.032228
		gene22595	DNA excision repair protein ERCC-1 (AtERCC1) (similar to)	0.844		0.0151505
		gene28117	Insulin-degrading enzyme (Insulinase) (probable)	0.801		0.0163266
		gene22929	LIM domain and RING finger protein C1223.01 (probable)	-2.663		0.0124827
		gene10859	Cullin-1 (similar to)	-2.305		0.0239138
		gene28373	Protease Do-like 9 (similar to)	-2.185		0.0278335
		gene09696	RING finger and CHY zinc finger domain-containing protein 1 (probable)	-2.106		0.0185545
		gene31379	F-box/LRR-repeat protein At5g22700 (probable)	-2.016		0.0441203
		gene09045	Dipeptidyl peptidase family member 6 (probable)	-1.703		0.0183013
		gene02267	F-box protein SKIP24 (similar to)	-1.549		0.011414
		gene01524	F-box/kelch-repeat protein At3g06240 (probable)	-1.51		0.013983
		gene13349	F-box protein At2g17036 (probable)	-1.483		0.0360717
		gene15089	Leishmanolysin C1, Precursor (probable)	-1.411		0.00915702
		gene19372	Proteasome subunit alpha type-2-A (similar to)	-1.401		0.00155139
		gene22170	WD repeat domain phosphoinositide-interacting protein 3 (WIPI-3) (probable)	-1.172		0.0359817
		gene09788	E3 ubiquitin-protein ligase MARCH1 (MARCH-I) (probable)	-1.142		0.00202593
		gene31756	Autophagy-related protein 8f (Protein autophagy 8f), Precursor (putative)	-1.112		0.00177525
		gene22573	E3 ubiquitin-protein ligase Topors (p53-binding protein 3) (probable)	-1.097		0.0039784
		gene27309	F-box/FBD/LRR-repeat protein At1g16930 (probable)	-1.096		0.0434593
		gene19235	CAAX prenyl protease 1 homolog (FACE-1) (putative)	-1.072		0.00949615
		gene10006	Histone acetyltransferase HAC12 (probable)	-1.054		0.0365973
		gene29251	Protease Do-like 7 (similar to)	-1.046	1.63	0.0145674	0.00315401
		gene04223	E3 ubiquitin-protein ligase At3g02290 (similar to)	-1.044		0.0250704
		gene23651	Aspartyl aminopeptidase (probable)	-1.035	1.053	0.0301875	0.0293994
		gene03347	Autophagy-related protein 8C, Precursor (putative)	-1.006		0.0026141
		gene04428	F-box/FBD/LRR-repeat protein At1g13570 (probable)	-0.957		0.0410357
		gene30538	Aspartyl aminopeptidase (probable)	-0.918	0.829	0.0295657	0.0474594
		gene30695	Anaphase-promoting complex subunit 4 (APC4) (probable)	-0.911		0.00720089
		gene11189	F-box protein 7 (putative)	-0.872		0.0198355
		gene28308	Carboxyl-terminal-processing protease, Precursor (probable)	-0.862		0.0362243
		gene29052	Acylamino-acid-releasing enzyme (AARE) (probable)	-0.85	0.825	0.00360778	0.00552088
		gene00655	Sentrin-specific protease 2 (Axam) (probable)	-0.845		0.0187272
		gene07885	RING finger protein 141 (probable)	-0.829		0.0194006
		gene13153	E3 SUMO-protein ligase PIAS3 (probable)	0.919		0.0311107
		gene10806	E3 ubiquitin-protein ligase CG7694 (probable)	1.018		0.00176831
		gene08653	E3 ubiquitin-protein ligase HECTD1 (probable)	1.174		0.0282928
		gene06022	E3 ubiquitin-protein ligase HECW1 (hNEDL1) (probable)	-1.051		0.0465861
		gene02138	E3 ubiquitin-protein ligase MARCH6 (MARCH-VI) (similar to)	-1.252	1.224	0.0107416	0.0231813
		gene09720	E3 ubiquitin-protein ligase RGLG1 (probable)	1.278		0.0023058
		gene14557	E3 ubiquitin-protein ligase RNF167, Precursor (probable)	-0.92		0.0131214
		gene22871	U-box domain-containing protein 43 (probable)		3.311	0	0.00590374
		gene04537	Protease 2 (probable)		2.585	0	0.0171724
		gene23824	Subtilisin-like protease, Precursor (probable)		2.544	0	0.0208245
		gene27311	F-box/LRR-repeat protein At3g59200 (probable)		2.207	0	0.0498558
		gene20590	E3 ubiquitin-protein ligase UPL1 (Ubiquitin-protein ligase 1) (putative)		1.867	0	0.0101969
		gene01602	Calpain clp-1 (probable)		1.86	0	0.00153601
		gene17000	Adagio protein 1 (FKF1-like protein 2) (similar to)		1.795	0	0.00970136
		gene07513	Puromycin-sensitive aminopeptidase (PSA) (probable)		1.607	0	0.0306474
		gene16240	Subtilisin-like protease, Precursor (probable)		1.576	0	0.0128865
		gene32578	Acylamino-acid-releasing enzyme (AARE) (probable)		1.254	0	0.045175
		gene00817	Sacsin (probable)		1.251	0	0.0295909
		gene26562	E3 ubiquitin-protein ligase UPL2 (Ubiquitin-protein ligase 2) (probable)		1.21	0	0.0351689
		gene19272	Ubiquitin-conjugating enzyme E2-23 kDa (similar to)		1.112	0	0.0426968
		gene09560	RING finger and CHY zinc finger domain-containing protein 1 (probable)		1.086	0	0.0405069
		gene20992	Anaphase-promoting complex subunit 1 (APC1) (probable)		1.063	0	0.0330478
		gene02393	Probable ubiquitin-conjugating enzyme E2 24		1.006	0	0.0273175
		gene02155	Serine carboxypeptidase-like 48, Precursor (similar to)		0.928	0	0.0456667
		gene01740	Probable E3 ubiquitin-protein ligase ARI8 (similar to)		0.817	0	0.0188291
		gene05368	E3 ubiquitin-protein ligase MARCH8 (MARCH-VIII) (probable)		0.8	0	0.0178784
		gene24175	E3 ubiquitin-protein ligase RGLG1 (similar to)		-2.842	0	0.00588845
		gene14963	Probable mitochondrial chaperone bcs1		-2.822	0	0.0101285
		gene14949	Probable mitochondrial chaperone bcs1		-1.486	0	0.0261932
		gene09656	Ubiquitin (similar to)		-1.377	0	0.0090087
		gene03647	RING-H2 zinc finger protein RHA2a (similar to)		-1.243	0	0.00184865
		gene18582	Actinidain (Actinidin), Precursor (probable)		-1.188	0	0.0468034
		gene13500	Ubiquitin (similar to)		-1.177	0	0.00910567
		gene17487	Autophagy-related protein 10 (probable)		-1.087	0	0.013293
		gene30828	E3 ubiquitin-protein ligase RNF167, Precursor (similar to)		-1.018	0	0.0367648
		gene13913	Ubiquitin (similar to)		-0.968	0	0.0254558
		gene31375	Cullin-1 (probable)		-0.954	0	0.00885132
		gene05000	F-box/kelch-repeat protein At3g23880 (probable)		-0.927	0	0.0439702
		gene30879	Probable ubiquitin carrier protein E2 37		-0.894	0	0.00273273
		gene21627	Agrin, Precursor (probable)		-0.875	0	0.0164442
		gene30609	Calcyclin-binding protein (CacyBP) (probable)		-0.859	0	0.00785664
		gene15170	Proteasome subunit alpha type-1-A (AtPSM30) (similar to)		-0.856	0	0.00407255
		gene14950	Probable mitochondrial chaperone bcs1		-0.847	0	0.00163477
		gene09141	Sumo-conjugating enzyme ubc9 (putative)		-0.846	0	0.00292639
	Folding
		gene31726	Probable FKBP-type peptidyl-prolyl cis-trans isomerase 4, chloroplastic (PPIase), Precursor (putative)	-1.81		0.0168755
		gene02729	Chaperonin CPN60-2, mitochondrial, Precursor (putative)		-1.242		0.00185406
		gene13420	FK506-binding protein 4 (PPIase) (probable)		-0.943		0.00225456
	Glycosilation
		gene04896	Beta-1,3-galactosyltransferase pvg3 (PvGal synthesis protein 3) (probable)	4.09		0.014599
		gene18709	Dolichyl-diphosphooligosaccharide--protein glycosyltransferase 48 kDa subunit (Oligosaccharyl transferase 48 kDa subunit), Precursor (probable)	1.017		0.0191944
		gene20033	Beta-(1,2)-xylosyltransferase (similar to)	-1.069		0.015376
		gene28330	Alpha-mannosidase 2 (AMAN II) (probable)		0.958		0.00268535
		gene11048	UDP-glucose:glycoprotein glucosyltransferase 1, Precursor (probable)		0.843		0.00400265
	Signaling
	Sugar and nutrient physiology
		gene29796	Glutamate receptor 2.7, Precursor (probable)	2.361	2.209	0.0294567	0.0215089
		gene17332	Glutamate receptor 3.2 (AtGluR2), Precursor (putative)	1.059		0.040214
		gene28556	Glutamate receptor 2.7, Precursor (probable)		2.152		0.0185243
		gene13265	Repressor protein C (probable)		1.922		0.0211987
		gene08674	Glutamate receptor 2.7, Precursor (probable)		1.265		0.0336194
		gene11951	Atrophin-1 (probable)		-1.935		0.0170915
		gene17325	Peptide chain release factor 3 (RF-3) (probable)		-1.775		0.02223
		gene11954	Seizure protein 6 homolog (SEZ-6), Precursor (probable)		-1.019		0.00989041
	Receptor kinases (membrane bounded)
		gene01195	Receptor-like protein kinase BRI1-like 3, Precursor (putative)	0.844		0.0111993
		gene01491	Probable LRR receptor-like serine/threonine-protein kinase At4g26540, Precursor (putative)	0.805		0.0257268
		gene02011	Cysteine-rich receptor-like protein kinase 10 (Cysteine-rich RLK10), Precursor (probable)	-1.001		0.00991611
		gene02191	Probable LRR receptor-like serine/threonine-protein kinase At4g31250, Precursor	-1.06		0.0417465
		gene02384	Lectin-domain containing receptor kinase A4.3, Precursor (probable)	0.891		0.0104037
		gene04247	Receptor-like protein kinase FERONIA, Precursor (probable)		1.658		0.0338014
		gene04903	Leucine-rich repeat receptor-like protein kinase PEPR2 (PEP1 receptor 2), Precursor (probable)		-0.956		0.0306444
		gene04905	Probable LRR receptor-like serine/threonine-protein kinase At4g36180, Precursor	1.305		0.0318523
		gene05645	Probable inactive receptor kinase At1g27190, Precursor	1.033		0.00261709
		gene05696	Receptor-like protein kinase, Precursor (similar to)		1.195		0.0303102
		gene06308	Serine/threonine-protein kinase BRI1-like 2, Precursor (probable)	1.677		0.0100125
		gene09151	Putative receptor protein kinase ZmPK1, Precursor (probable)	1.63		0.0228528
		gene11302	Receptor-like protein kinase HSL1, Precursor (probable)		1.039		0.0412421
		gene11311	Receptor-like protein kinase HSL1, Precursor (probable)		1.315		0.0425129
		gene12633	Receptor-like protein kinase HSL1, Precursor (probable)		3.214		0.00731241
		gene13121	Probable inactive receptor kinase At4g23740, Precursor (similar to)		0.815		0.00385654
		gene13366	Probable LRR receptor-like serine/threonine-protein kinase RFK1, Precursor	0.824		0.00555764
		gene13479	LRR receptor-like serine/threonine-protein kinase GSO1, Precursor (probable)		1.02		0.0316028
		gene13584	Probable LRR receptor-like serine/threonine-protein kinase At1g06840, Precursor	-1.24		0.0368586
		gene13771	LRR receptor-like serine/threonine-protein kinase GSO1, Precursor (probable)		0.931		0.0494874
		gene15062	Wall-associated receptor kinase-like 14, Precursor (probable)		0.84		0.0172468
		gene15597	Probable LRR receptor-like serine/threonine-protein kinase At4g36180, Precursor	-1.943		0.0455428
		gene16334	Probable LRR receptor-like serine/threonine-protein kinase At1g56130, Precursor		1.013		0.017523
		gene16992	Somatic embryogenesis receptor kinase 1 (AtSERK1), Precursor (probable)	-2.562		0.0170907	0
		gene17154	Cysteine-rich receptor-like protein kinase 29 (Cysteine-rich RLK29), Precursor (probable)	-4.427	1.874	0.000185215	0.0360944
		gene18599	Probably inactive receptor-like protein kinase At2g46850, Precursor (putative)		2.168		0.0172796
		gene19039	Serine/threonine-protein kinase BRI1-like 2, Precursor (probable)	-1.138		0.0380718
		gene19103	LRR receptor-like serine/threonine-protein kinase GSO1, Precursor (probable)	-0.915		0.0345148
		gene19246	Probable receptor-like protein kinase At5g24010, Precursor		2.406		0.0412999
		gene19299	LRR receptor-like serine/threonine-protein kinase GSO1, Precursor (probable)		1.493		0.0406994
		gene19894	LRR receptor-like serine/threonine-protein kinase ERECTA, Precursor (probable)	-2.153		0.0414872
		gene20593	Lectin-domain containing receptor kinase A4.1, Precursor (probable)	-1.197		0.00533164
		gene21424	LRR receptor-like serine/threonine-protein kinase FLS2, Precursor (probable)		-1.145		0.00753685
		gene21426	LRR receptor-like serine/threonine-protein kinase GSO2, Precursor (probable)		1.186		0.02004
		gene21516	Cysteine-rich receptor-like protein kinase 28 (Cysteine-rich RLK28), Precursor (similar to)	-2.281		0.0127442
		gene22229	Protein STRUBBELIG-RECEPTOR FAMILY 2, Precursor (similar to)	1.541	2.899	0.0140123	0.000937193
		gene22908	Probable receptor-like protein kinase At1g51890, Precursor		1.749		0.0299892
		gene24460	Probable LRR receptor-like serine/threonine-protein kinase At1g14390, Precursor		0.834		0.0393694
		gene24687	Receptor-like protein kinase HAIKU2, Precursor (probable)		1.139		0.0173997
		gene24962	Lectin-domain containing receptor kinase A4.3, Precursor (probable)	1.257	2.373	0.0407832	0.0162174
		gene28051	Probable LRR receptor-like serine/threonine-protein kinase At1g56130, Precursor	-1.396		0.0479347
		gene28451	Cysteine-rich receptor-like protein kinase 42 (Cysteine-rich RLK42), Precursor (putative)		2.289		0.00808416
		gene30004	Probable LRR receptor-like serine/threonine-protein kinase At4g08850, Precursor		2.262		0.0149465
		gene30033	Probable LRR receptor-like serine/threonine-protein kinase At1g56130, Precursor		1.383		0.0500116
		gene32207	Cysteine-rich receptor-like protein kinase 42 (Cysteine-rich RLK42), Precursor (probable)	1.129		0.0478361
		gene34051	Tyrosine-sulfated glycopeptide receptor 1 (probable)		1.904		0.0336
		gene34056	Tyrosine-sulfated glycopeptide receptor 1 (probable)		1.446		0.04457
		gene34321	Wall-associated receptor kinase-like 9, Precursor (similar to)		0.926		0.0164484
		gene34339	Wall-associated receptor kinase-like 4, Precursor (probable)	2.107		0.0100423
		gene34533	Tyrosine-sulfated glycopeptide receptor 1 (probable)		2.356		0.0255138
		gene35049	Probably inactive leucine-rich repeat receptor-like protein kinase At2g25790, Precursor (probable)		2.822		0.0421339
		gene01965	Cysteine-rich receptor-like protein kinase 11 (Cysteine-rich RLK11), Precursor (similar to)		1.741		0.00980742
		gene28630	Probable LRR receptor-like serine/threonine-protein kinase At1g07650, Precursor	0.878		0.00862846
		gene19263	Probable leucine-rich repeat receptor-like protein kinase At5g49770, Precursor	1.372		0.0318498
		gene23251	Probable LRR receptor-like serine/threonine-protein kinase At1g53420, Precursor	1.034		0.00147784
		gene25908	Probable LRR receptor-like serine/threonine-protein kinase At1g53420, Precursor	-2.907		0.0109292
		gene19499	Protein STRUBBELIG-RECEPTOR FAMILY 8, Precursor (similar to)	1.453		0.0417667
		gene20954	Receptor-like protein kinase At3g21340, Precursor (similar to)		0.958	0	0.0285034
		gene26498	BRASSINOSTEROID INSENSITIVE 1-associated receptor kinase 1 (BRI1-associated receptor kinase 1), Precursor (similar to)	-2.789		0.00772817
	Receptor kinases (others)
		gene16049	Copia protease (probable)	1.335		0.0421345
		gene30516	Cysteine-rich repeat secretory protein 60, Precursor (similar to)	-2.108		0.0409425
		gene00522	Polygalacturonase inhibitor (PGIP), Precursor (putative)	1.797	1.746	0.0474824	0.00556833
		gene06309	Phytosulfokine receptor 1 (DcPSKR1), Precursor (probable)	1.786		0.0493167
		gene25036	S-locus-specific glycoprotein S13 (SLSG-13), Precursor (probable)		1.792		0.0217921
		gene30638	Putative serine/threonine-protein kinase receptor (SRK), Precursor (probable)		2.146		0.00791385
		gene30648	Putative serine/threonine-protein kinase receptor (SRK), Precursor (probable)		1.3		0.00167708
		gene30753	Putative serine/threonine-protein kinase receptor (SRK), Precursor (probable)		1.811		0.0421542
		gene12692	Mitogen-activated protein kinase kinase 2 (MAP kinase kinase 2) (similar to)	-0.937		0.0019042
		gene05705	Mitogen-activated protein kinase kinase 5 (MAP kinase kinase 5) (similar to)	0.877		0.000606529
		gene24085	Mitogen-activated protein kinase kinase kinase ANP1 (probable)	1.757	1.263	0.0232592	0.0416365
		gene14811	Mitogen-activated protein kinase kinase 4 (MAP kinase kinase 4) (probable)		2.266		0.0364303
		gene30979	Mitogen-activated protein kinase kinase kinase 1 (MEK kinase 1) (probable)	-0.961		0.0090575
		gene13920	Mitogen-activated protein kinase kinase kinase A (MEK kinase 1) (probable)		0.82		0.0480336
		gene24440	Mitogen-activated protein kinase kinase kinase 1 (MAP kinase kinase kinase 1) (similar to)		2.439	0	0.00430802
		gene09448	Mitogen-activated protein kinase kinase kinase 7-interacting protein 3 (probable)	0.857		0.00322861
	Calcium
		gene09392	Probable calcium-binding protein CML27 (putative)	0.861	-1.242	0.0386318	0.00595461
		gene28264	Polcalcin Phl p 7 (P7) (probable)	-2.853		0.0123095
		gene12323	Calcium-transporting ATPase 8, plasma membrane-type (probable)	-1.364		0.00902427
		gene30694	Polyadenylate-binding protein, cytoplasmic and nuclear (Poly(A)-binding protein) (probable)	-1.067		0.00247788
		gene18254	Calcium-dependent protein kinase 1 (AtCDPK 1) (similar to)		2.348		0.0316548
		gene13606	Calcium-binding allergen Bet v 3 (putative)		1.909		0.026031
		gene17503	Calmodulin-like protein 3 (putative)		1.887		0.00469266
		gene12671	Abnormal spindle-like microcephaly-associated protein homolog (probable)		1.269		0.049976
		gene16514	Probable calcium-binding protein CML22		-2.668		0.0395358
		gene00230	Retinitis pigmentosa 1-like 1 protein (probable)		-1.275		0.00245262
		gene29033	Putative calcium-transporting ATPase 13, plasma membrane-type		-1.167		0.0149857
		gene05089	Squidulin (probable)		-0.944		0.0378495
		gene21916	Probable calcium-binding protein CML36 (putative)		-0.943		0.0054715
		gene03959	Centrin-1 (probable)		-0.91		0.0283776
	Phosphinositides
		gene27507	1-phosphatidylinositol-3-phosphate 5-kinase FAB1 (Phosphatidylinositol-3-phosphate 5-kinase) (probable)		0.909		0.0285885
		gene20940	Pleckstrin homology domain-containing protein 1 (AtPH1) (putative)		-0.957		0.00105937
	G-proteins
		gene31961	Serine/threonine-protein kinase SMG1 (SMG-1) (probable)		1.357		0.030478
		gene23086	PRA1 family protein F2 (AtPRA1.F2) (probable)	1.081	-1.204	0.0141126	0.00817975
		gene21284	PRA1 family protein B3 (AtPRA1.B3) (putative)	1.056		0.00432069
		gene23936	Septum-promoting GTP-binding protein 1 (probable)	1.005		0.0226012
		gene17366	Brefeldin A-inhibited guanine nucleotide-exchange protein 2 (Brefeldin A-inhibited GEP 2) (probable)	-1.772	4.099	0.00885067	0.00260687
		gene19353	Brefeldin A-inhibited guanine nucleotide-exchange protein 2 (Brefeldin A-inhibited GEP 2) (probable)	-1.46	3.023	0.040108	0.0126505
		gene24555	WD repeat-containing protein 6 (probable)		1.056		0.0379365
		gene13812	Protein MON2 homolog (probable)		0.935		0.0249356
		gene13790	PRA1 family protein B4 (AtPRA1.B4) (probable)		-0.899		0.0191747
		gene28181	PRA1 family protein B2 (AtPRA1.B2) (probable)		-0.889		0.0223749
		gene09413	Guanine nucleotide-binding protein subunit beta-like protein (similar to)		-0.855		0.0268744
	Light
		gene17631	BTB/POZ domain-containing protein At5g48800 (similar to)	1.462		0.0256493
		gene28060	Root phototropism protein 2 (putative)	1.368		0.0267281
		gene29013	Early light-induced protein, chloroplastic (ELIP), Precursor (putative)	1.117		0.000113625
		gene10611	Blue-light photoreceptor PHR2 (similar to)	1.025		0.000530934
		gene15609	Protein FAR1-RELATED SEQUENCE 5 (probable)	0.906		0.00628562
		gene01553	BTB/POZ domain-containing protein At5g48800 (probable)	-2.341		0.0363344
		gene15264	Protein FAR-RED IMPAIRED RESPONSE 1 (probable)	-1.721		0.038356
		gene19817	Putative protein FAR1-RELATED SEQUENCE 10	-1.143		0.0112337
		gene17149	Protein SPA1-RELATED 3 (putative)		0.982		0.0125658
	Miscellaneous
		gene26090	Presenilin-like protein At2g29900 (probable)		0.803		0.0318041
	Cell
	Organization
		gene21905	Regulatory protein NPR1 (Nim1) (probable)	2.005		0.000284701
		gene04776	Probable plastid-lipid-associated protein 11, chloroplastic, Precursor (similar to)	1.447		0.00838445
		gene19518	Plastid-lipid-associated protein, chloroplastic, Precursor (putative)	0.924		0.0113029
		gene16672	Ankyrin repeat domain-containing protein 13B (probable)	0.882		0.00307869
		gene28703	Chromosome partition protein smc homolog (probable)	0.863		0.00382226
		gene06526	Ankyrin repeat-containing protein At5g02620 (probable)	-2.772	2.594	0.00801107	0.0203387
		gene10302	Ankyrin repeat-containing protein At3g12360 (probable)	-2.524		0.0412481
		gene01244	Ankyrin repeat domain-containing protein 1 (probable)	-1.776		0.00224973
		gene15474	Probable plastid-lipid-associated protein 8, chloroplastic, Precursor (putative)	-1.377		0.0278601
		gene18385	Ankyrin repeat, PH and SEC7 domain containing protein secG (probable)	-1.192		0.000454083
		gene13414	Protein regulator of cytokinesis 1 (probable)	-1.046		0.027022
		gene30919	Dynein light chain 1, cytoplasmic (similar to)	-0.922		0.00890056
		gene10369	Ankyrin repeat-containing protein At5g02620 (probable)		1.871		0.0327502
		gene08375	Myosin-J heavy chain (probable)		1.174		0.0194196
		gene12700	Myosin-J heavy chain (probable)		1.009		0.0187112
		gene12411	Cytoskeleton-associated protein 5 (probable)		0.9		0.0500506
		gene18000	Gamma-tubulin complex component 3 homolog (x109p) (probable)		0.887		0.0238299
		gene07882	Villin-1 (putative)		0.869		0.0156039
		gene13830	Protein SCAR2 (AtSCAR2) (probable)		0.82		0.0456393
		gene14343	Annexin-like protein RJ4		-1.092		0.00763576
		gene18775	Tubulin beta-2/beta-3 chain (similar to)		-0.857		0.042606
	Division
		gene18353	Probable E3 ubiquitin-protein ligase HERC5	2.794		0.0219298
		gene08986	Probable E3 ubiquitin-protein ligase HERC3	1.106		0.0103694
		gene26460	Structural maintenance of chromosomes protein 4 (AtSMC4) (similar to)	-1.587		0.0150836
		gene14748	Anaphase-promoting complex subunit 10 (APC10) (putative)	-1.074		0.00372143
		gene26414	Prohibitin-1, mitochondrial, Precursor (similar to)		-1.135		8.5082e-05
		gene25924	Ribosome-recycling factor (RRF) (probable)		-0.952		0.00583295
		gene01833	Rae1-like protein At1g80670 (putative)		-0.937		0.036077
		gene13197	Putative septum site-determining protein minD (similar to)		-0.899		0.0099166
	Cycle
		gene30836	Peptidyl-prolyl cis-trans isomerase B1 (PPIase B1), Precursor (probable)	1.203		0.010997
		gene17865	Protein BRUSHY 1 (probable)	1.094		0.01462
		gene20969	Peptidyl-prolyl cis-trans isomerase CYP20-1 (PPIase CYP20-1), Precursor (similar to)	0.818		0.0265208
		gene02528	Cyclin-A3-2 (CycA3) (putative)	-1.395		0.027541
		gene05312	Cyclin-U4-1 (CycU4) (putative)	-1.266		0.0287311
		gene25209	Protein EFR3 homolog cmp44E (probable)	-0.925		0.0459318
		gene31324	Cyclin-T1-4 (CycT1) (similar to)		2.901	0	0.00421274
		gene06629	70 kDa peptidyl-prolyl isomerase (PPIase) (putative)		-1.384	0	0.00240254
		gene29926	Peptidyl-prolyl cis-trans isomerase CYP19-3 (PPIase CYP19-3) (similar to)		-0.916	0	0.0044408
	Vesicle transport
		gene18183	Exocyst complex component 7 (probable)	1.897		0.0133352
		gene18181	Exocyst complex component 7 (probable)	1.031		0.0196139
		gene08099	Hepatocyte growth factor-regulated tyrosine kinase substrate (probable)	0.914		0.000143678
		gene10191	hypothetical protein	-1.116		0.0390323
		gene19260	Syntaxin-71 (AtSYP71) (similar to)		1.291	0	0.0351332
		gene13790	PRA1 family protein B4 (AtPRA1.B4) (probable)		-0.899	0	0.0191747
	Cell death
		gene13865	Complement component C6, Precursor (probable)		0.838		0.00205245
	Development
	Storage proteins
		gene10882	Glutelin type-A 2 basic chain, Precursor (probable)	1.43		0.0500687
		gene24061	Patatin-3-Kuras 1, Precursor (probable)	-2.295		0.0332305
		gene20098	Patatin-2-Kuras 1, Precursor (probable)		-3.45		0.0322747
	Late embryogenesis abundant
		gene13162	Putative endo-1,4-beta-xylanase (Xylanase) (probable)	-3.637		0.0115178	0
		gene31876	Elongation factor G (EF-G) (probable)		2.864		0.0195964
		gene31861	Holliday junction ATP-dependent DNA helicase ruvA (probable)		2.02		0.00488968
		gene31974	Cation channel sperm-associated protein 1 (CatSper1) (probable)		1.728		0.0494879
	Squamosa promoter binding like (SPL)
		gene29149	Squamosa promoter-binding-like protein 14 (putative)		0.906		0.0353242
		gene22889	Squamosa promoter-binding-like protein 1 (probable)		0.856		0.00353836
		gene01338	Squamosa promoter-binding-like protein 13 (probable)		0.851		0.00308716
	Unspecified
		gene03685	Probable serine/threonine-protein kinase At1g18390, Precursor		2.442		0.0415719
		gene01043	Probable serine/threonine-protein kinase DDB_G0278509		2.743		0.0312796
		gene06846	Metallothionein-3 (MT-3) (probable)	2.994		0.0490486
		gene17531	Kinesin light chain (KLC) (probable)	1.737		0.00262302
		gene31149	NAC domain-containing protein 72 (ANAC072) (putative)	1.213		0.000951981
		gene05376	hypothetical protein	1.163		0.000498032
		gene27707	Probable transporter MCH1	0.936		0.0167311
		gene30807	Probable transporter MCH1	0.823		0.000609624
		gene00933	Protein RUPTURED POLLEN GRAIN 1 (probable)	0.823		0.0275039
		gene29730	Auxin-repressed 12.5 kDa protein (putative)	-3.799		0.00252993
		gene32625	Nodulin-21 (N-21) (similar to)	-2.878		0.0242137
		gene35011	NAC domain-containing protein 74 (ONAC074) (probable)	-2.876		0.00403233
		gene28374	Auxin-induced protein 5NG4 (probable)	-1.996		0.00962495
		gene18208	Auxin-induced protein 5NG4 (probable)	-1.877		0.00524023
		gene21466	Auxin-induced protein 5NG4 (probable)	-1.868		0.0352371
		gene12216	Segregation and condensation protein A (probable)	-1.65		0.000716699
		gene14514	Senescence-associated protein DIN1 (similar to)	-1.382		0.0460606
		gene18112	hypothetical protein	-1.217		0.0033092
		gene15704	DNA-directed RNA polymerase III subunit rpc6 (RNA polymerase III subunit C6) (probable)	-0.948		0.0306043
		gene21535	Protein FLOWERING LOCUS T (putative)		3.187		0.00902344
		gene23436	Probable transporter MCH1		3.12		0.00260857
		gene21872	Protein CUP-SHAPED COTYLEDON 1 (ANAC054) (probable)		2.714		0.0188555
		gene23435	Probable transporter MCH1		2.698		0.00846792
		gene01471	Enhancer of mRNA-decapping protein 4 (probable)		1.453		0.0495322
		gene25112	Protein RUPTURED POLLEN GRAIN 1 (probable)		1.39		0.00606548
		gene23199	Tetraspanin-31-A (Tspan-31-A) (probable)		1.339		0.0438244
		gene12932	Embryogenesis-associated protein EMB8 (probable)		1.219		0.0110311
		gene19067	Pollen-specific protein SF3 (probable)		1.181		0.0406762
		gene26547	UPF0378 protein KIAA0100, Precursor (probable)		1.138		0.00798849
		gene18305	Protein virilizer (probable)		1.055		0.0187134
		gene08809	Cylicin-1 (probable)		0.931		0.0158373
		gene19721	Protein strawberry notch homolog 2 (probable)		0.897		0.0115457
		gene28313	Activating molecule in BECN1-regulated autophagy protein 1 (probable)		0.882		0.0116539
		gene15974	Vegetative incompatibility protein HET-E-1 (probable)		0.865		0.0120674
		gene31845	WD repeat-containing protein 7 (probable)		0.854		0.0165901
		gene28351	Protein teflon (probable)		-1.251		0.0041558
		gene09268	DAG protein, chloroplastic, Precursor (probable)		-0.894		0.000230397
	Transport
	P- and v-ATPases
		gene08702	Plasma membrane ATPase 4 (putative)	0.912		0.0419198
		gene17015	Plasma membrane ATPase 4 (putative)		1.588		9.72969e-05
		gene04477	Putative phospholipid-transporting ATPase 9 (AtALA9)		1.388		0.0114487
		gene10396	Importin-5 (Imp5) (probable)		1.124		0.031533
		gene13555	Phospholipid-transporting ATPase 1 (AtALA1) (putative)		1.098		0.0277478
		gene07488	Putative phospholipid-transporting ATPase 4 (AtALA4)		1.014		0.00292297
	Sugars
		gene05814	Sugar transport protein 13 (similar to)	1.712		0.0169747
		gene19793	Inositol transporter 4 (putative)	1.483		0.0226881
		gene31477	Monosaccharide-sensing protein 2 (similar to)	0.889		0.0321276
		gene19556	Dolichyl-diphosphooligosaccharide--protein glycosyltransferase subunit 3 (probable)	0.8		0.00433218
		gene06691	Sugar transporter ERD6-like 16 (putative)	-2.562		0.0436355
		gene30014	Sugar transport protein 5 (putative)		0.841		0.00475717
	Amino acids
		gene21298	Probable sodium-coupled neutral amino acid transporter 6	1.135		0.0381297
		gene17327	Proton-coupled amino acid transporter 3 (Proton/amino acid transporter 3) (probable)	0.965		0.0126958
		gene21297	Sodium-coupled neutral amino acid transporter 5 (probable)	-2.306		0.0279184
		gene11123	Auxin transporter-like protein 3 (putative)	-1.656		0.0413085
		gene21579	Vacuolar amino acid transporter 1 (probable)	-1.593		0.00933565
		gene08620	Lysine histidine transporter-like 8 (similar to)		1.969		0.0337221
		gene04517	Probable sodium-coupled neutral amino acid transporter 6		1.189		0.000335233
		gene23476	Vacuolar amino acid transporter 1 (probable)		0.964		0.0453987
	Nitrate
		gene28461	Nitrate transporter (probable)	1.202		0.00042904
	Phosphate
		gene17331	Probable anion transporter 5, Precursor (similar to)	0.958		0.0354146
		gene07999	Probable anion transporter 1, chloroplastic, Precursor (similar to)	1.147		0.025778
		gene04473	Putative phosphate transporter 1 (similar to)		1.785		0.0367787
	Metabolite transporters at the envelope membrane
		gene14669	2-oxoglutarate/malate translocator, chloroplastic, Precursor (similar to)	1.119		8.05385e-05
		gene12102	Probable mitochondrial 2-oxoglutarate/malate carrier protein (OGCP)	0.988		0.00353452
		gene27448	2-oxoglutarate/malate translocator, chloroplastic, Precursor (probable)	0.938		0.000496939
		gene29727	Mitochondrial substrate carrier family protein S (CAC) (probable)	-1.093		0.0315054
		gene26122	ADP,ATP carrier protein (ANT) (putative)	-0.96		0.034585
		gene01405	Calcium-binding mitochondrial carrier protein SCaMC-1 (probable)	-0.937		0.0211566
		gene17340	Phosphate carrier protein, mitochondrial (PTP), Precursor (probable)		1.649		0.0414061
		gene26082	Mitochondrial substrate carrier family protein E (probable)		-1.186		0.00254701
	Metal
		gene23040	Putative cadmium/zinc-transporting ATPase 3 (similar to)	-1.658		0.0148139
		gene32452	Putative copper-transporting ATPase 3 (similar to)		1.197		0.00670059
		gene06121	Protein ABCI12, chloroplastic (ABC transporter ABCI.12), Precursor (similar to)		0.962		0.0480662
		gene09749	Ethylene-insensitive protein 2 (AtEIN2) (probable)		0.858		0.0349742
	Peptides and oligopeptides
		gene01912	Oligopeptide transporter 7 (AtOPT7) (putative)	2.06	1.089	0.00116687	0.025921
		gene19831	Oligopeptide transporter 3 (AtOPT3) (putative)	1.065	1.029	0.0121934	0.016061
		gene08304	Peptide transporter PTR3-A (AtPTR3) (putative)	-1.52		0.0285084
		gene18713	Peptide transporter PTR1 (probable)		2.526		0.0344808
		gene20514	Oligopeptide transporter 1 (AtOPT1) (similar to)		1.708		0.0187182
		gene21308	Peptide transporter PTR3-A (AtPTR3) (probable)		1.209		0.0201881
		gene01234	Endoglucanase 11, Precursor (similar to)		0.895		0.000936691
		gene01345	Probable metal-nicotianamine transporter YSL6 (AtYSL6) (putative)		0.883		0.0364296
		gene09167	Probable metal-nicotianamine transporter YSL5 (AtYSL5) (similar to)		0.844		0.0212219
		gene22957	Peptide transporter PTR1 (probable)		-3.498		0.00182294
	Unspecified cations
		gene19713	Solute carrier family 22 member 3 (probable)	-2.135		0.0248421
		gene14388	Sodium/hydrogen exchanger 4 (NHE-4) (putative)	-1.567		0.0435338
		gene14480	Mitochondrial inner membrane magnesium transporter mrs2, Precursor (probable)	-1.051		0.000747707
		gene00613	Sodium/hydrogen exchanger 7 (NHE-7) (putative)	-0.823		0.00382443
		gene08201	Microtubule-associated protein TORTIFOLIA1 (probable)		0.953		0.025089
		gene08208	Magnesium transporter MRS2 homolog, mitochondrial, Precursor (probable)		0.912		0.0314361
	Potassium
		gene30970	Potassium channel AKT1 (putative)	1.671	1.42	0.00333823	0.00251875
		gene04996	Potassium channel AKT1 (similar to)	-1.308		0.00861279
		gene00608	Probable potassium transporter 17 (similar to)		0.92		0.000569613
		gene11046	Potassium channel AKT2/3 (putative)		0.869		0.0288301
	ABC transporters and multidrug resistance systems
		gene09417	ABC transporter A family member 7 (ABC transporter ABCA.7) (putative)	2.887		0.0402875
		gene22715	ABC transporter G family member 11 (ABC transporter ABCG.11) (similar to)	2.42		0.020496
		gene13125	ABC transporter C family member 10 (ABC transporter ABCC.10) (similar to)	1.453		0.0105077
		gene03853	ABC transporter B family member 19 (ABC transporter ABCB.19) (putative)	1.312	1.004	0.000938333	0.00578743
		gene16257	ABC transporter G family member 11 (ABC transporter ABCG.11) (similar to)	0.866	1.455	0.0188019	0.00307019
		gene25739	ABC transporter G family member 36 (ABC transporter ABCG.36) (similar to)	-2.41		0.0186642
		gene08553	ABC transporter B family member 13 (ABC transporter ABCB.13) (similar to)	-1.866		0.0458014
		gene02468	ABC transporter A family member 1 (ABC transporter ABCA.1) (similar to)	-1.857	3.913	0.0180796	0.00214127
		gene30945	ABC transporter G family member 32 (ABC transporter ABCG.32) (similar to)	-1.576	2.944	0.00206583	0.00189905
		gene15834	ABC transporter C family member 13 (ABC transporter ABCC.13) (similar to)	-1.079	1.257	0.00914868	0.0132058
		gene23095	ABC transporter C family member 8 (ABC transporter ABCC.8), Precursor (similar to)	-0.956		0.0498644
		gene23175	Pleiotropic drug resistance protein 2 (similar to)		2.604		0.0147962
		gene32277	Pleiotropic drug resistance protein 1 (similar to)		2.143		0.0438962
		gene01288	ABC transporter G family member 37 (ABC transporter ABCG.37) (similar to)		1.893		0.0462334
		gene14806	ABC transporter G family member 12 (ABC transporter ABCG.12) (putative)		1.868		0.000737136
		gene23176	Pleiotropic drug resistance protein 2 (similar to)		1.595		0.0100945
		gene02215	ABC transporter B family member 2 (ABC transporter ABCB.2) (putative)		1.587		0.0105447
		gene16256	ABC transporter G family member 11 (ABC transporter ABCG.11) (probable)		1.297		0.00237916
		gene31536	ABC transporter G family member 11 (ABC transporter ABCG.11) (putative)		1.218		0.00374138
		gene21684	ABC transporter C family member 3 (ABC transporter ABCC.3) (putative)		1.115		0.020133
		gene02466	ABC transporter A family member 1 (ABC transporter ABCA.1) (similar to)		1.057		0.0250631
		gene23498	Pleiotropic drug resistance protein 2 (similar to)		1.038		0.0233006
		gene25738	Pleiotropic drug resistance protein 12 (similar to)		1.023		0.0282973
		gene23495	Pleiotropic drug resistance protein 2 (similar to)		0.917		0.0146493
		gene26714	ABC transporter B family member 20 (ABC transporter ABCB.20) (putative)		0.859		0.0152721
		gene05678	ABC transporter C family member 8 (ABC transporter ABCC.8), Precursor (similar to)		0.851		0.0475204
		gene10588	ABC transporter C family member 14 (ABC transporter ABCC.14) (putative)		0.802		0.01758
	Unspecified anions.arsenite-transporting ATPase
		gene23188	Putative arsenical pump-driving ATPase (probable)	1.158		0.0473476
		gene24532	Boron transporter 1 (putative)		1.294		0.0331118
	Major Intrinsic Proteins
		gene13973	Probable aquaporin TIP1-2 (OsTIP1) (putative)	3.073		0.0115708
		gene09721	Aquaporin PIP2-1 (AtPIP2) (similar to)	2.051		0.0071282
		gene23293	Aquaporin PIP2-1 (AtPIP2) (putative)	0.972		5.94743e-05
		gene01819	Probable aquaporin NIP5-1 (AtNIP5) (similar to)	0.966	1.466	0.043377	0.0247578
		gene09792	Aquaporin TIP1-1 (AtTIP1) (putative)	0.854		0.0340352
	Calcium
		gene04350	Vesicle transport protein USE1 (probable)	-1.288		0.0452554
		gene01463	Vacuolar cation/proton exchanger 5 (similar to)	-0.825		0.00657596
	Cyclic nucleotide or calcium regulated channels
		gene15829	Putative cyclic nucleotide-gated ion channel 8 (similar to)	1.687		0.0444205
		gene21601	Cyclic nucleotide-gated ion channel 1 (AtCNGC1) (similar to)	-1.515		0.0363897
		gene11530	Cyclic nucleotide-gated ion channel 1 (AtCNGC1) (probable)		1.87		0.0476444
		gene31440	Probable cyclic nucleotide-gated ion channel 10		0.922		0.00187293
	Membrane system unknown
		gene21219	Sugar phosphate exchanger 2 (probable)		0.988		0.0329585
	Miscellaneous
		gene12546	Surface presentation of antigens protein spaS (probable)	1.079		0.000346321
		gene21322	Adenine/guanine permease AZG1 (AtAzg1) (putative)	1.04		0.00625636
		gene28881	Superoxide dismutase 1 copper chaperone (probable)	0.818		0.0136051
		gene11929	Protein TRANSPARENT TESTA 12 (probable)	-2.187		0.0248709
		gene09430	Protein TRANSPARENT TESTA 12 (probable)	-1.922		0.0219468
		gene12461	Protein TRANSPARENT TESTA 12 (probable)	-1.255		0.0478367
		gene15073	Protein TRANSPARENT TESTA 12 (probable)		1.645		0.00585409
		gene26473	DNA-damage-inducible protein F (probable)		1.072		0.0275145
		gene11129	Protein TRANSPARENT TESTA 12 (putative)		0.945		0.0441723
		gene12035	Protein TRANSPARENT TESTA 12 (probable)		0.827		0.0153498
		gene12462	Multidrug and toxin extrusion protein 1 (hMATE-1) (probable)		-0.829		0.0405968
	Co-factor and vitamin metabolism
		gene25315	Thiazole biosynthetic enzyme, chloroplastic, Precursor (similar to)	1.426		0.0255203
		gene07903	Probable pyridoxal biosynthesis protein PDX1 (putative)	1.227	-0.921	0.00587232	0.0379426
		gene18342	Probable pyridoxal biosynthesis protein PDX1 (similar to)	0.807	-1.025	0.00883609	0.00207576
		gene13981	GTP cyclohydrolase-2, Precursor (similar to)	-2.101		0.0447654
		gene00793	FMN adenylyltransferase (probable)	-1.13		0.000956821
		gene17658	Haloacid dehalogenase-like hydrolase domain-containing protein 1A (probable)		-1.231		0.0200226
	OPP
		gene27907	6-phosphogluconate dehydrogenase, decarboxylating (putative)	1.017		0.000230686
		gene00291	Glucose-6-phosphate 1-dehydrogenase 4, chloroplastic (G6PDH4), Precursor (putative)	-1.298		0.00301336
		gene09367	hypothetical protein	-1.281		0.0121535
		gene15604	Glucose-6-phosphate 1-dehydrogenase, chloroplastic (G6PD), Precursor (putative)	-0.921	1.518	0.0499113	0.0456097
	Polyamine metabolism
		gene01668	Arginine decarboxylase (ARGDC) (putative)		0.831		0.00279055
	Photosynthesis
		gene12537	Chlorophyll a-b binding protein, chloroplastic, Precursor (similar to)		1.259		0.0128413
	Redox
		gene18776	Heme-binding-like protein At3g10130, chloroplastic, Precursor (probable)	1.724		0.00156506
		gene12300	Thioredoxin-X, chloroplastic, Precursor (putative)	1.112		0.00396034
		gene02704	Glutaredoxin-C6 (AtGrxC6) (similar to)	1.076		0.0195961
		gene16423	Superoxide dismutase [Cu-Zn] (similar to)	0.923		0.00218287
		gene17994	Thioredoxin-like 5, chloroplastic, Precursor (similar to)	-2.271		0.0452105
		gene00630	Thioredoxin H-type 2 (Trx-H-2) (similar to)	-2.23		0.00597961
		gene26038	Thioredoxin-like 1 (similar to)	-1.293		0.00441183
		gene24655	Thioredoxin-like 4 (similar to)	-0.901		0.00484516
		gene10403	Thioredoxin domain-containing protein C06A6.5, Precursor (probable)		1.401		0.00404756
	Fermentation
		gene13476	Pyruvate decarboxylase isozyme 2 (PDC) (putative)	1.109		0.000454507
		gene00664	Aldehyde dehydrogenase family 2 member B7, mitochondrial (ALDH2b), Precursor (putative)	-1.445		0.031408
		gene02099	Aldehyde dehydrogenase family 2 member C4 (putative)		2.086		0.0153017
	Gluconeogenesis / glyoxylate cycle
		gene05620	Phosphoenolpyruvate carboxykinase [ATP] (PEP carboxykinase) (similar to)		2.393		0.00948416
	Mitochondrial electron transport / ATP synthesis
		gene19192	Cytochrome c oxidase assembly protein COX11, mitochondrial, Precursor (probable)	1.083		0.0194368
		gene03056	Probable dolichyl pyrophosphate Glc1Man9GlcNAc2 alpha-1,3-glucosyltransferase (similar to)	0.902		0.00133461
		gene06045	Cytochrome c oxidase subunit 5B, mitochondrial, Precursor (probable)	0.88		0.00165466
		gene02671	NADH-ubiquinone oxidoreductase 20 kDa subunit, mitochondrial (CI-20kD), Precursor (putative)	0.826		0.00205736
		gene30496	NADH-ubiquinone oxidoreductase 75 kDa subunit, mitochondrial (CI-75kD), Precursor (putative)	0.804		0.00035613
		gene12243	ATP synthase subunit beta, mitochondrial, Precursor (similar to)	-1.763		0.0136252
		gene17766	Prohibitin-2 (putative)		-0.872549		0.0189968
		gene03428	Prohibitin-2 (similar to)		-1.072		0.0224988
	Nucleotide metabolism
		gene08950	Histidine triad nucleotide-binding protein 3 (HINT-3) (probable)	-2.305		0.0476288
		gene19578	Adenosine deaminase-like protein (probable)		0.883		0.00281582
		gene11427	Cytidine deaminase (CDA) (probable)		-0.848		0.00538934
	S-assimilation
		gene19636	5'-adenylylsulfate reductase 1, chloroplastic (APS sulfotransferase 1), Precursor (putative)	1.327		0.00751118	0
		gene29029	Adenylyl-sulfate kinase (similar to)	0.984	1.155	0.0336462	0.014255
	TCA / org transformation
		gene03761	Dihydrolipoyllysine-residue acetyltransferase component of pyruvate dehydrogenase complex (probable)	1.24		0.00552745
		gene18624	Pyruvate dehydrogenase E1 component subunit alpha (similar to)	1.012		0.00709488
		gene28004	Succinate dehydrogenase [ubiquinone] iron-sulfur subunit 2, mitochondrial (Ip), Precursor (similar to)	0.846		0.00161099
		gene27180	Malate dehydrogenase, mitochondrial, Precursor (similar to)	0.852		0.00175102
		gene25735	NADP-dependent malic enzyme (NADP-ME) (similar to)		1.257		0.040699
	Biodegradation of Xenobiotics
		gene30993	hypothetical protein	-1.793		0.0130041
		gene02183	CDC45-related protein (Cdc45) (probable)	-1.574		0.00444353
		gene31004	Metallothiol transferase fosB (probable)	-1.208		0.0203018
	C1-metabolism
		gene29492	Serine hydroxymethyltransferase 1 (SHMT 1) (similar to)	0.932		0.00962264
	Metal handling
		gene06290	Superoxide dismutase 1 copper chaperone (probable)	0.871		0.0382503
		gene14095	Metallothionein-like protein 1 (MT-1) (similar to)	-2.852		0.0225564
		gene29656	Copper ion binding protein, putative (probable)	-2.828		0.00752968
		gene14096	Metallothionein-like protein 1 (MT-1) (similar to)	-1.983		0.00932673
		gene18186	Probable cadmium-transporting ATPase	-0.855		0.0470648
	N-metabolism
		gene31233	Urease accessory protein ureF (probable)	-0.852		0.0198757
	Miscellaneous
		gene29006	1-deoxy-D-xylulose 5-phosphate reductoisomerase, chloroplastic (1-deoxyxylulose-5-phosphate reductoisomerase), Precursor (similar to)	-1.426		0.0154789
		gene06074	2',3'-cyclic-nucleotide 2'-phosphodiesterase (probable)	-1.148		0.0137719
		gene25948	22.0 kDa heat shock protein (AtHsp22.0), Precursor (probable)	-1.437		0.0304934
		gene29104	26S proteasome non-ATPase regulatory subunit 10 (probable)		-0.905		0.00806803
		gene31768	28S ribosomal protein S18a, mitochondrial (S18mt-a), Precursor (probable)		2.002		0.0156142
		gene20447	2-isopropylmalate synthase 1 (probable)		-1.054		0.00783576
		gene05372	2-succinyl-5-enolpyruvyl-6-hydroxy-3-cyclohexene-1- carboxylate synthase (probable)	0.834		0.00736905
		gene06433	30S ribosomal protein S12 (probable)	-1.981	1.829	0.0186757	0.0440923
		gene23606	3-deoxy-manno-octulosonate cytidylyltransferase (CKS) (similar to)	-2.348		0.0193864
		gene03701	3-phosphoshikimate 1-carboxyvinyltransferase (EPSP synthase) (probable)	1.139		0.00926316
		gene21538	4-trimethylaminobutyraldehyde dehydrogenase (TMABADH) (probable)		3.399		0.0118389
		gene09706	50S ribosomal protein L2, chloroplastic (probable)		1.418		0.0229678
		gene13897	50S ribosomal protein L25 (probable)	-2.616		0.00764035
		gene12881	50S ribosomal protein L4 (probable)		1.591		0.0221819
		gene08904	50S ribosomal protein L5, chloroplastic (similar to)		-0.845		0.000895591
		gene03413	60S ribosomal export protein nmd3 (probable)	2.49	1.812	0.00688201	0.0109587
		gene15313	60S ribosomal protein L3 (similar to)	-1.914		0.0412511
		gene08941	60S ribosome subunit biogenesis protein NOP8 (probable)	-1.169	-1.557	0.0389219	0.011985
		gene21514	70 kDa protein (probable)	-0.947		0.0173348
		gene02469	ABC transporter A family member 1 (ABC transporter ABCA.1) (similar to)		3.257		0.00732604
		gene28617	ABC transporter G family member 28 (ABC transporter ABCG.28) (similar to)		2.662		0.00457339
		gene10040	Abhydrolase domain-containing protein FAM108A, Precursor (probable)		-1.085		0.0333987
		gene08120	Abscisic stress-ripening protein 2 (similar to)		0.974		0.000695356
		gene28314	Absent in melanoma 1 protein (probable)		1.587		0.0475858
		gene20931	Actin cytoskeleton-regulatory complex protein pan1 (probable)		-0.915		0.00162583
		gene18075	Actin filament-associated protein 1 (probable)	-1.201		0.0401293
		gene31208	Actin-binding LIM protein 1 (abLIM-1) (probable)	0.859		0.00911669
		gene20886	Actin-like protein 13E (probable)	-1.507		0.0303142
		gene06503	Actin-related protein 2/3 complex subunit 4 (p20-ARC) (similar to)	-0.903		0.0336447
		gene17995	Activator of 90 kDa heat shock protein ATPase homolog (probable)		-1.442		0.002542
		gene02550	Acyl-CoA-binding domain-containing protein 3 (Acyl-CoA binding protein 3), Precursor (probable)	0.988		0.00708795
		gene15994	ADAMTS-like protein 4 (ADAMTSL-4), Precursor (probable)	0.937		0.00601412
		gene18101	Adenylate cyclase type 4 (similar to)	1.129		0.0125889
		gene22447	Adenylate cyclase, terminal-differentiation specific (probable)		2.858		0.0220169
		gene31121	ADIPOR-like receptor CG5315 (probable)		0.802		0.00784184
		gene01867	ADP,ATP carrier protein, mitochondrial (ANT), Precursor (similar to)	-1.225	1.019	0.0105309	0.035344
		gene28725	ADP,ATP carrier protein, mitochondrial (ANT), Precursor (similar to)	-1.279		0.0182471
		gene17506	Adrenodoxin-like protein, mitochondrial, Precursor (probable)	0.914		0.0108414
		gene14339	Agglutinin-like protein ALA1, Precursor (probable)	0.907		0.000838909
		gene23187	Aggregation substance, Precursor (probable)		-1.491		0.00346234
		gene00543	Alpha-keto-acid decarboxylase (KDC) (probable)		1.993		0.0351862
		gene09468	Amidophosphoribosyltransferase, chloroplastic (ATase), Precursor (similar to)	-0.905		0.0117366
		gene29292	Ankyrin repeat domain-containing protein 50 (probable)		-0.901		0.0130349
		gene30216	Ankyrin repeat-containing protein C20orf12 homolog (probable)	1.274		0.0032267
		gene19517	Ankyrin-1 (probable)	-2.39		0.0285556
		gene31864	Anthranilate phosphoribosyltransferase (probable)	1.287		0.0158836
		gene11362	Arabinogalactan peptide 20 (AG-peptide 20), Precursor (similar to)		-1.048		0.0298717
		gene12868	Argininosuccinate lyase (ASAL) (probable)	-1.367	0.949	0.00330374	0.0171503
		gene17812	Arginyl-tRNA synthetase (ArgRS) (probable)	-1.441		0.0210948
		gene17108	asparagine synthase (glutamine-hydrolyzing) (probable)	-3.424		0.00382121
		gene23537	Aspartyl-tRNA synthetase (AspRS) (probable)	-1.038		0.0168577
		gene34547	Aspartyl-tRNA synthetase (AspRS) (probable)	-1.472		0.0356298
		gene34920	Aspartyl-tRNA synthetase (AspRS) (probable)	-0.877	1.337	0.0345809	0.00887535
		gene14850	Ataxin-7-like protein 1 (probable)		2.438		0.0201627
		gene10392	ATECP63, putative (similar to)	1.476	-1.659	0.00678632	0.00380317
		gene13141	Protein timeless homolog (rTIM) (probable)	1.049		0.0230149
		gene16858	ATP synthase epsilon chain, chloroplastic (probable)	-2.129		0.035415
		gene29330	ATP-dependent Clp protease proteolytic subunit (probable)		2.382		0.0194618
		gene16284	ATP-dependent hsl protease ATP-binding subunit hslU (probable)	0.868		0.0201557
		gene32567	ATP-dependent RNA helicase chl1 (probable)	-2.382	2.267	0.0149912	0.0231056
		gene09140	ATP-dependent RNA helicase Ddx1 (DEAD box protein 1) (probable)		1.845		0.0337485
		gene27957	ATP-dependent RNA helicase DDX51 (probable)	-1.733	2.008	0.00649273	0.0305557
		gene15134	Autophagy-related protein 2 (probable)		1.354		0.014591
		gene23437	Autophagy-related protein 2 homolog A (probable)		2.497		0.0416211
		gene14094	Auxin response factor 15 (probable)	-2.428		0.00509342
		gene17580	Auxin response factor 7 (probable)	3.607		0.0366885
		gene19105	B3 domain-containing protein At2g31420 (probable)	-0.848		0.0281643
		gene28599	B3 domain-containing protein Os01g0234100 (probable)	-1.27	1.195	0.0328086	0.0301758
		gene31945	B3 domain-containing protein REM6 (probable)	-0.901		0.00418529
		gene26534	BEACH domain-containing protein lvsC (probable)		1.549		0.0099467
		gene28833	BEL1-like homeodomain protein 8 (BEL1-like protein 8) (probable)		1.241		0.0125779
		gene03518	Beta-(1,2)-xylosyltransferase (probable)		1.256		0.0182349
		gene03565	Beta-casein, Precursor (probable)		-1.013		0.0236712
		gene22665	Beta-casein, Precursor (probable)	-2.019		0.049897
		gene25188	Betaine aldehyde dehydrogenase (BADH) (probable)	0.975		0.0262493
		gene31297	Biotin synthase (probable)	0.882		0.0048104
		gene19627	Bis(5'-nucleosyl)-tetraphosphatase, symmetrical (probable)	-2.522		0.00551733
		gene21230	Blue-sensitive opsin (probable)		1.382		0.0344438
		gene00949	Bowman-Birk type proteinase inhibitor B-III (probable)	-3.515		0.0117685
		gene05795	Brother of CDO (Protein BOC), Precursor (probable)		2.154		0.035733
		gene07793	BUD13 homolog (probable)	-1.302		0.0214261
		gene28470	Cadherin-related tumor suppressor, Precursor (probable)	-1.446		0.0307143
		gene00485	Calcium-transporting ATPase 10, plasma membrane-type (similar to)		1.586		0.0314864
		gene04312	Caldesmon, smooth muscle (CDM) (probable)	1.288		0.0395219
		gene18914	Carbamoyl-phosphate synthase large chain (probable)		-1.963		0.000161682
		gene07423	Carbonic anhydrase 2 (CA-II) (probable)	-0.851		0.0444021
		gene18904	Carboxypeptidase D, Precursor (probable)		1.114		0.0284946
		gene15628	CAS1 domain-containing protein 1, Precursor (probable)	1.06		0.0179296
		gene24996	Catalase-peroxidase (CP), Precursor (probable)		-0.857		0.032935
		gene11339	Cathepsin O, Precursor (similar to)	-2.254		0.0357454
		gene30275	Cell death regulator Aven (probable)	-2.049		0.0455813
		gene16413	Cell division cycle 5-related protein (probable)		0.891		0.0204952
		gene16674	Cell division cycle 5-related protein (similar to)		0.829		0.0436703
		gene03665	Centromere protein C 1 (CENP-C) (probable)		0.902		0.0429713
		gene05120	Centromere/kinetochore protein zw10 homolog (similar to)	-1.352		0.0353917
		gene30612	Chaperone protein dnaK (probable)		-1.044		0.0377884
		gene21102	Chaperone protein htpG (probable)	-2.248		0.0413368
		gene26647	Chemotaxis response regulator protein-glutamate methylesterase 2 (probable)		0.925		0.016981
		gene09377	Chitinase 3, Precursor (probable)		1.939		0.00381984
		gene13839	Chromosome partition protein smc homolog (probable)	0.8		0.0113255
		gene15754	Cirhin (probable)		1.556		0.0328989
		gene27653	Cleavage and polyadenylation factor complex subunit C74.02c (similar to)	-1.432		0.00842266
		gene24402	Coat protein (probable)		1.481		0.0458125
		gene30202	Coiled-coil domain-containing protein 129 (similar to)	-1.762		0.0459578
		gene06858	Coiled-coil domain-containing protein 155 (probable)	-1.963		0.0119331
		gene29943	Coiled-coil domain-containing protein 34 (probable)		2.502		0.0233121
		gene23859	Coiled-coil domain-containing protein 72 homolog (similar to)	0.915	-1.178	0.0150471	0.00273126
		gene00773	Coiled-coil domain-containing protein 75 (probable)	-0.936		0.023894
		gene24032	Collagen alpha-1(XI) chain, Precursor (probable)	1.139		0.0183641
		gene35163	Collagen alpha-1(XI) chain, Precursor (probable)	2.279		0.0457748
		gene21442	Colossin-A, Precursor (probable)	-1.238		0.00961876
		gene22650	Complement C4 gamma chain, Precursor (probable)	-0.821		0.0318033
		gene01878	Condensin complex subunit 2 (probable)	-1.425		0.0473845
		gene20040	conserved hypothetical protein		1.105		0.00409168
		gene16305	COPII coat assembly protein sec16 (probable)	-0.893		0.0151603
		gene28707	Cortactin-binding protein 2 (CortBP2) (probable)	-2.15		0.00928365
		gene09876	CRAL-TRIO domain-containing protein C23B6.04c (probable)	0.805		0.0239148
		gene30343	CTL-like protein DDB_G0274487 (probable)		1.647		0.00341964
		gene10277	Cyclin-J (probable)	-2.977		0.0363763
		gene18246	Cyclin-K (probable)	1.623		0.000183121
		gene27382	Cysteine protease ATG4D (Autophagin-4) (probable)		1.527		0.0375382
		gene17799	Cysteine proteinase 1, Precursor (probable)	0.938		0.0158881
		gene10103	Cysteinyl-tRNA synthetase (CysRS) (probable)		0.924		0.0330462
		gene31609	Cytosolic 5'-nucleotidase III-like protein B (cN-III-like protein B) (probable)		1.701		0.0416533
		gene09709	D-alanine--D-alanine ligase (probable)	-0.821		0.00478935
		gene31390	D-alanyl-D-alanine carboxypeptidase dacC (DD-carboxypeptidase), Precursor (probable)	-1.215	1.421	0.0205421	0.00825139
		gene00814	Defensin-like protein 232 (SCR-like protein 23), Precursor (probable)	-1.055	-1.003	0.00302813	0.00222776
		gene08617	Dehydrin COR47 (probable)	0.826		0.0341267
		gene25798	Dentin sialoprotein, Precursor (probable)		0.97		0.0200232
		gene12457	Dibasic-processing endoprotease, Precursor (probable)		-0.835		0.0111232
		gene28423	Diphthamide biosynthesis protein 1 (DPH2-like 1) (probable)	-1.162	2.064	0.0412529	0.0110912
		gene23387	DNA (cytosine-5)-methyltransferase 1 (Dnmt1) (probable)	-3.721		0.0103184
		gene18765	DNA double-strand break repair rad50 ATPase (probable)	1.034		0.0365813
		gene27291	DNA polymerase delta subunit 3 (probable)	0.977		0.00909641
		gene31772	DNA polymerase III polC-type (PolIII) (probable)		3.129		0.0218068
		gene14261	DNA polymerase lambda (Pol Lambda) (probable)	-1.142		0.0211221
		gene03445	DNA repair protein RAD5 (probable)		2.208		0.0133617
		gene23586	DNA repair protein RAD5 (probable)	-2.084		0.0458855
		gene25860	DNA-damage-repair/toleration protein DRT102 (probable)	-1.55		0.0142983
		gene06539	DNA-directed RNA polymerase subunit beta' (RNAP subunit beta') (probable)	0.836		0.00648861
		gene16587	DNA-directed RNA polymerase, mitochondrial (MtRPOL), Precursor (similar to)	0.976		0.000688867
		gene23844	DnaJ-like chaperone JEM1, Precursor (probable)		1.706		0.00252319
		gene12886	Dof zinc finger protein DOF3.2 (AtDOF3.2) (probable)	-0.836		0.0134732
		gene17572	Dolichol-phosphate mannosyltransferase subunit 3 (MPD synthase subunit 3) (probable)	-1.007	-0.909	0.0260882	0.0174566
		gene28092	Early growth response protein 1 (EGR-1) (probable)	-1.439		0.0213729
		gene17323	EC protein III (similar to)	-1.85		0.0198879
		gene26781	Ecotropic viral integration site 5 protein homolog (EVI-5) (probable)	-0.907		0.0499899
		gene31932	Ectonucleoside triphosphate diphosphohydrolase 3 (NTPDase 3) (probable)		1.692		0.0333087
		gene20221	Effector protein hopW1-1 (probable)	-1.461		0.0355177
		gene06551	Electron transport complex protein rnfC (probable)	0.866		0.0449969
		gene00838	Elongation factor Ts (EF-Ts) (probable)	-1.297		0.00124571
		gene11802	Endonuclease (probable)	-1.593		0.0151636
		gene27677	Endonuclease (probable)	-1.339		0.0494719
		gene28107	Endonuclease (probable)		2.461		0.0246449
		gene27275	Envoplakin (probable)		-1.084		0.00445421
		gene06099	Epstein-Barr nuclear antigen 2 (EBV nuclear antigen 2) (probable)	-3.124		0.0119996
		gene27438	Erythroid differentiation-related factor 1 (probable)		1.652		0.0020837
		gene21220	Ethanolamine ammonia-lyase light chain (probable)		-1.372		0.00744374
		gene06854	Eukaryotic translation initiation factor 3 subunit A (eIF3a) (probable)		2.182		0.0204809
		gene10405	Eukaryotic translation initiation factor 3 subunit C (eIF3c) (probable)	1.332		0.0228977
		gene18319	Exocyst complex protein EXO70 (probable)	-3.669		0.00265385
		gene31560	Exopolyphosphatase (ExopolyPase) (probable)	-0.853		0.0256392
		gene09727	Extensin, Precursor (probable)	-1.263		0.0126503
		gene25731	FAM10 family protein At4g22670 (probable)	-0.999		0.0303234
		gene13435	FBD-associated F-box protein At5g27750 (probable)		-2.211		0.0326514
		gene31615	F-box only protein 43 (probable)	-0.847		0.00554244
		gene30161	F-box protein At1g70590 (probable)	-1.756		0.0189361
		gene26407	F-box protein At2g07140 (probable)	-1.466		0.00298646
		gene27831	F-box protein At2g27310 (probable)	0.833		0.0031115
		gene04177	F-box protein At3g28330 (probable)	2.247		0.0467048
		gene23609	F-box protein At4g12560 (probable)		-1.771		0.0244109
		gene27191	F-box protein At4g12560 (probable)	-2.327		0.0148345
		gene30961	F-box protein At4g22390 (probable)	-1.611		0.0330599
		gene04212	F-box protein At5g07610 (probable)		0.905		0.0220418
		gene28926	F-box/kelch-repeat protein At1g57790 (probable)	-0.872	-1.226	0.0352157	0.0307863
		gene31765	F-box/kelch-repeat protein At1g57790 (probable)	-0.865		0.00823237
		gene24298	F-box/kelch-repeat protein At3g06240 (probable)	-1.295		0.0234055
		gene15121	F-box/kelch-repeat protein At3g23880 (probable)	-3.242		0.00212465
		gene17268	F-box/LRR-repeat protein 13 (probable)		-2.62		0.0382298
		gene25045	F-box/LRR-repeat protein 13 (probable)	-2.029		0.0371541
		gene04407	F-box/LRR-repeat protein 13 (similar to)	-2.836	3.171	0.0296718	0.020083
		gene13205	F-box/LRR-repeat protein 4 (AtFBL4) (probable)	-1.121		0.037054
		gene25749	F-box/LRR-repeat protein At2g43260 (similar to)	-1.35		0.0484577
		gene30366	F-box/LRR-repeat protein At3g48880 (probable)		-1.982		0.0132176
		gene18700	F-box/LRR-repeat protein At3g58930 (probable)	0.809		0.0427379
		gene07994	Ferredoxin-dependent glutamate synthase (probable)	-2.354		0.0278674
		gene08293	Fetuin-B, Precursor (probable)	0.816		0.035195
		gene06516	Fiilensin (probable)		-1.022		0.0117426
		gene13274	Filaggrin-2 (FLG-2) (probable)	1.508		0.0138502
		gene30125	Filaggrin-2 (FLG-2) (probable)	1.062		0.00505459
		gene17224	Filament-like plant protein 1 (AtFPP1) (probable)		0.861		0.0474566
		gene04551	FK506-binding protein 4 (PPIase) (probable)	-1.536		0.0154454
		gene09761	FKBP12-associated protein 1 (similar to)	-1.582		0.00725021
		gene05010	FMN adenylyltransferase (probable)	-1.183		0.0109207
		gene29890	Forkhead box protein D4 (FREAC-5) (probable)	1.079		0.000295171
		gene26926	Formin-like protein 18, Precursor (probable)	-1.834		0.0261715
		gene00561	Frizzled-3, Precursor (probable)	1.033	-0.959	0.00686946	0.0108135
		gene14590	Fructose-1,6-bisphosphatase class 1 1 (FBPase class 1 1) (probable)	-3.174		0.012111
		gene04472	Gap junction alpha-1 protein (Cx43) (probable)		2.41		0.0131662
		gene15657	Gastric triacylglycerol lipase (Gastric lipase), Precursor (probable)		2.136		0.033266
		gene15514	GATA zinc finger domain-containing protein C1393.08 (probable)	0.982		0.00048623
		gene02400	GDSL esterase/lipase At1g29660, Precursor (probable)		1.173		0.0401843
		gene27782	GDSL esterase/lipase At4g10955 (probable)		-1.715		0.0300342
		gene21374	General transcription factor IIH subunit 3 (probable)	-1.404		0.00443752
		gene31714	Geranyltranstransferase (similar to)	-1.369		0.00713097
		gene16218	Germin-like protein, Precursor (probable)	-4.074		0.0468772
		gene32561	Glu S.griseus protease inhibitor (similar to)	-1.31		0.034837
		gene21241	Glucose-6-phosphate isomerase (GPI) (probable)	-1.424		0.0391501
		gene06792	Glucosidase 2 subunit beta (PKCSH), Precursor (probable)		-2.054		0.0384898
		gene35018	Glutamate [NMDA] receptor-associated protein 1 (similar to)		-1.574		0.00959331
		gene16623	Glutamate synthase [NADH], amyloplastic, Precursor (similar to)		2.518		0.0333913
		gene10156	Glutaminase 2 (probable)		1.793		0.0393349
		gene31962	Glycerol dehydrogenase small subunit (SLDH) (probable)	-0.846		0.0402153
		gene31475	Glycosyltransferase 8 domain-containing protein 2 (probable)	-1.105		0.0306388
		gene10816	Golgi resident protein GCP60 (GOLPH1) (probable)	-2.45	-2.377	0.0269185	0.0434421
		gene02052	GP2, Precursor (probable)	-1.593		0.019048
		gene25844	GRB2-associated-binding protein 2 (probable)		1.899		0.02491
		gene01607	Growth factor receptor-bound protein 14 (probable)	-1.418		0.0231575
		gene01418	GTPase-activating Rap/Ran-GAP domain-like protein 3 (probable)	2.266		0.0398234
		gene15751	Guanine nucleotide-binding protein subunit beta-like protein (probable)	1.211		0.0448605
		gene10311	HEAT repeat-containing protein 5A (probable)		0.921		0.00600008
		gene25491	HEAT repeat-containing protein 5B (probable)		0.948		0.0402664
		gene09820	HEAT repeat-containing protein 7A homolog (probable)		1.368		0.00711697
		gene04287	Heat shock protein DDB_G0288861 (probable)		1.008		0.0308609
		gene15337	Heparan sulfate glucosamine 3-O-sulfotransferase 3B1 (Heparan sulfate 3-O-sulfotransferase 3B1) (probable)	-3.596		0.00277354
		gene09027	Histidine-rich glycoprotein, Precursor (probable)		0.92		0.0092734
		gene30820	Histidine-rich protein (probable)		1.623		0.0431805
		gene20446	Histidinol-phosphate aminotransferase (probable)		-0.876		0.0399943
		gene17395	Histone deacetylase complex subunit SAP130-B (probable)	-1.091	-1.227	0.049148	0.044156
		gene14356	Histone deacetylase HDT1 (HD2a) (probable)		-0.842		0.0156425
		gene09376	Histone H3.1t (H3t) (similar to)	-2.282		0.0350589
		gene27596	Histone-lysine N-methyltransferase SUVR4 (Su(var)3-9-related protein 4) (probable)	-1.096		0.0242988
		gene31521	Histone-lysine N-methyltransferase, H3 lysine-36 and H4 lysine-20 specific (NR-binding SET domain-containing protein) (probable)	-1.69		0.0219394
		gene27369	Histone-lysine N-methyltransferase, H3 lysine-4 specific (probable)	1.364		0.0066357
		gene20487	HMG1/2-like protein (similar to)	0.858		0.0225801
		gene10748	Holliday junction ATP-dependent DNA helicase ruvA (probable)	-0.874		0.0257717
		gene03850	Homeobox protein bagpipe (probable)	0.978		0.0133431
		gene27358	Homeobox protein cut-like 1 (CDP) (probable)	-2.079		0.0201144
		gene19074	Homeobox protein MSX-1 (probable)	-1.46		0.0481211
		gene30399	Homeobox-leucine zipper protein ATHB-15 (probable)	0.936		0.00690999
		gene03037	Homeobox-leucine zipper protein REVOLUTA (probable)		-0.959		0.00137199
		gene25303	Hydroxyacylglutathione hydrolase (Glx II) (probable)		1.695		0.0346062
		gene16214	Immediate early glycoprotein, Precursor (probable)		1.099		0.0447106
		gene05889	Immunoglobulin G-binding protein H (IgG-binding protein H), Precursor (probable)	1.275		0.00141997
		gene28018	IMP cyclohydrolase (probable)		2.122		0.00645414
		gene06046	IMP cyclohydrolase (similar to)	0.993		0.00832588
		gene34868	Inactive levansucrase, Precursor (probable)	-1.652		0.0305464
		gene32562	Inhibitor of trypsin and hageman factor (similar to)	-2.5		0.0439249
		gene13660	Inhibitory regulator protein IRA2 (probable)		1.957		0.0246432
		gene21846	Insulin-like 3 A chain, Precursor (probable)	-0.832		0.00192889
		gene08919	Integrase (probable)		-1.274		0.00112813
		gene32440	Intestinal mucin-like protein (MLP) (probable)	-2.135		0.0482177
		gene22797	Intraflagellar transport protein 88 homolog (TPR repeat protein 10) (probable)		-1.269		0.0478716
		gene04470	Involucrin (probable)	-1.867		0.022621
		gene32700	Involucrin (probable)	2.885		0.0333201
		gene18170	Isoleucyl-tRNA synthetase (IleRS) (probable)	1.451		0.0384734
		gene17541	IST1-like protein (probable)	-0.998		0.00978294
		gene22190	Kallikrein-7, Precursor (probable)	0.992		0.0261258
		gene14132	Keratin, type I cytoskeletal 18 (CK-18) (probable)		-1.401		0.0450141
		gene24987	Keratin, type I cytoskeletal 24 (CK-24) (probable)		-2.188		0.0325399
		gene14853	Keratin-associated protein 5-9 (UHS KerA) (probable)	-1.833		0.0373353
		gene31927	Ketol-acid reductoisomerase (probable)	-2.4		0.000641939
		gene06412	Kinesin light chain (KLC) (probable)		2.578		0.0105714
		gene07428	Kinesin-like protein KIF19 (similar to)	1.162		0.0210258
		gene22937	Laminin subunit alpha-1 (Laminin A chain), Precursor (probable)	1.294		0.00158143
		gene01466	Laminin subunit alpha-5, Precursor (probable)	1.135		0.0164392
		gene17411	Large tegument protein UL36 (pUL36) (probable)	0.811		0.0317678
		gene24726	Late embryogenesis abundant protein 2 (CapLEA-2) (probable)	1.017		0.0136672
		gene04163	Late embryogenesis abundant protein 76 (LEA 76) (probable)	-2.21		0.0212933
		gene16887	Lectin-B, Precursor (probable)	1.499		0.00378794
		gene27363	Leucine-rich repeat-containing protein 26, Precursor (probable)		-2.73		0.0500999
		gene33873	Leucine-rich repeat-containing protein 69 (probable)	1.416		0.0470861
		gene10395	Leucyl-tRNA synthetase (LeuRS) (probable)	2.22		0.000660398
		gene03426	LIM and calponin homology domains-containing protein 1 (probable)	-2.778		0.0150077
		gene12281	LIM domain-containing protein A (probable)	-1.571	1.717	0.0381732	0.0462469
		gene24561	Limkain-b1 (probable)		0.957		0.0397688
		gene03585	Lipase 46 kDa form, Precursor (probable)	1.318		0.00155108
		gene29242	Lipoprotein-releasing system transmembrane protein lolC (probable)	-0.882		0.0469627
		gene03233	LisH domain and HEAT repeat-containing protein KIAA1468 homolog (probable)		0.972		0.00734781
		gene13272	Low-temperature-induced 65 kDa protein (probable)	1.534		0.0111421
		gene04329	LYR motif-containing protein 4 (probable)		-1.079		0.000538237
		gene21051	Lysine-rich arabinogalactan protein 19 (Lys-rich AGP 19), Precursor (probable)	-1.232	-1.11	0.0378889	0.02954
		gene01929	Lysine-specific demethylase 5B (probable)	-2.202	2.624	0.00394365	0.00145775
		gene18727	Magnesium transporter NIPA3 (probable)	-2.092		0.00751224
		gene25012	Major pollen allergen Bet v 1-B (probable)	-3.789		0.0303704
		gene17641	Malate dehydrogenase [NADP], chloroplastic, Precursor (probable)		-2.517		0.0255244
		gene21480	Malate dehydrogenase, peroxisomal (probable)		1.276		0.013415
		gene32081	MAP1 light chain LC1 (probable)	1.446		0.000670236
		gene21503	MATH and LRR domain-containing protein PFE0570w (probable)	1.283		0.00186156
		gene00610	Matrix metalloproteinase-9 (MMP-9), Precursor (probable)	-1.497		0.0083592
		gene03396	Mediator of RNA polymerase II transcription subunit 1.1 (probable)	-0.891		0.0244611
		gene17538	Mediator of RNA polymerase II transcription subunit 13 (probable)	-1.906	1.853	0.037715	0.0166049
		gene24834	Mediator of RNA polymerase II transcription subunit 13 (probable)		0.812		0.0275915
		gene02474	Mediator of RNA polymerase II transcription subunit 23 (probable)	1.718		0.00562848
		gene27589	Mediator of RNA polymerase II transcription subunit 8 (probable)	-3.232		0.0034058
		gene15592	Methionyl-tRNA synthetase, cytoplasmic (MetRS) (probable)	-3.573		0.00178033
		gene02513	MFP1 attachment factor 1 (similar to)		-0.921		0.0129085
		gene21976	MICAL C-terminal-like protein (probable)	-1.234		0.0407006
		gene17713	Microtubule-associated protein 6 (MAP-6) (probable)		-1.868	0	0.0311118
		gene29747	Midnolin (probable)	-1.865		0.0143276
		gene32049	Mitochondrial antiviral-signaling protein (IPS-1) (probable)		0.909		0.026456
		gene26097	Mitochondrial import receptor subunit TOM5 homolog (putative)		-0.939		0.0219816
		gene07467	Mitochondrial intermembrane space import and assembly protein 40, Precursor (probable)		-0.991		0.00183715
		gene29161	Mitochondrial intermembrane space import and assembly protein 40, Precursor (probable)		-1.02		0.0488816
		gene28540	MLO-like protein 3 (AtMlo3) (similar to)		3.132		0.00236958
		gene32587	Mobility group protein 1A (probable)		-3.178		0.00878229
		gene00411	Modification methylase XamI (M.XamI) (probable)	-1.542	-1.362	0.028205	0.00874752
		gene02663	Molybdenum cofactor biosynthesis protein A (similar to)		-1.181	0	0.0246304
		gene02616	Molybdenum cofactor biosynthesis protein C (probable)		-1.201		0.00429748
		gene09763	Mucin-17 (MUC-17), Precursor (probable)	-1.574		0.0178593
		gene10717	Mucin-2 (MUC-2), Precursor (probable)		0.969		0.0466263
		gene15924	Mucin-5AC (TBM), Precursor (probable)		1.037		0.0492618
		gene23675	Mucin-5AC (TBM), Precursor (probable)		1.023		0.0260131
		gene29821	Mucin-5AC (TBM), Precursor (probable)	-1.537		0.0247449
		gene22019	Mucin-6 (MUC-6), Precursor (probable)	-2.037		0.000110076
		gene15403	Multiple epidermal growth factor-like domains 6, Precursor (probable)	-2.742		0.0259647
		gene27475	Multiple epidermal growth factor-like domains 6, Precursor (probable)	-0.935		0.0187686
		gene24485	Muscle M-line assembly protein unc-89 (probable)	1.038		0.0118053
		gene23100	MutS2 protein (probable)	-3.145		0.00596364
		gene16677	Myb family transcription factor APL (AtAPL) (similar to)	-1.18		0.0114676
		gene10831	Myb-like protein X (probable)	-1.056		0.00841895
		gene13610	Myosin-H heavy chain (probable)		-2.834		0.00510062
		gene16494	Myosin-H heavy chain (probable)		-0.802		0.00792159
		gene10948	Myosin-XV (probable)	1.353		0.0279529
		gene30391	Myosin-XV (probable)		3.043		0.0472121
		gene24573	N-(5'-phosphoribosyl)anthranilate isomerase (PRAI) (probable)	2.666		0.0272281
		gene10947	Na(+)/H(+) antiporter nhaA (probable)		-1.849		0.0253616
		gene05646	N-acetylglucosaminyl-phosphatidylinositol de-N-acetylase (PIG-L) (probable)		-1.94		0.0206141
		gene26343	NAD-dependent epimerase/dehydratase (probable)	1.52		0.0146538
		gene15868	NADH dehydrogenase [ubiquinone] 1 beta subcomplex subunit 8, mitochondrial (CI-ASHI), Precursor (similar to)		-1.133		0.0151881
		gene15489	NADH oxidoreductase hcr (probable)	-4.298		0.0217463
		gene21703	NADH pyrophosphatase (probable)	-1.979		0.0447649
		gene22124	NADH-ubiquinone oxidoreductase 75 kDa subunit (CI-75kD) (probable)	1.3		0.0461813
		gene05091	Nardilysin (NRD convertase), Precursor (probable)	-0.961		0.025086
		gene22562	Natterin-like protein (probable)	2.029		0.0397059
		gene25994	Nck-associated protein 1 homolog (probable)		2.275		0.0163382
		gene12792	Neuroblastoma-amplified sequence (probable)		0.946		0.0230935
		gene12793	Neuroblastoma-amplified sequence (probable)	-2.234	4.071	0.00451228	0.00487705
		gene12669	Neurofilament heavy polypeptide (NF-H) (probable)	-0.831		0.0253243
		gene22566	Ninein (GSK3B-interacting protein) (probable)		0.964		0.00482873
		gene20283	Nitric oxide synthase (NOS) (probable)	-1.986		0.0244011
		gene24063	Nodulation protein H (similar to)	-1.087		0.00339946
		gene19739	Non-specific lipid-transfer protein 1 (LTP 1) (probable)		-0.819		0.0314527
		gene15641	Non-structural protein 1 (NS1) (probable)		1.031	0	0.0138077
		gene02522	Nuclear distribution protein nudE homolog 1 (probable)	-2.76		0.00710703
		gene08319	Nuclear transcription factor Y subunit gamma (NF-YC) (probable)	1.152		0.0346164
		gene19340	Nucleocapsid protein p15-gag (probable)	-1.711		0.00967258
		gene11329	Nucleolar protein 11 (probable)	-4.244		0.0463928
		gene27562	Nucleolar protein 16 (probable)	-2.114		0.0306355
		gene08741	Nucleoredoxin (probable)	-0.894		0.00267371
		gene15909	Nudix hydrolase 3 (AtNUDT3) (putative)		0.869		0.00411306
		gene30514	Nudix hydrolase 18, mitochondrial (AtNUDT18), Precursor (similar to)	-1.40154		0.0122469
		gene03533	Obg-like ATPase 1 (probable)		-1.339		0.0410773
		gene16700	Olfactory receptor 2A7 (probable)		1.131		0.00799332
		gene31584	Oligogalacturonate-specific porin kdgM, Precursor (probable)	1.083	-0.913	0.0289121	0.0320395
		gene26642	Oligoribonuclease (probable)		0.819		0.0284696
		gene12319	Oligosaccharyltransferase complex subunit OSTC (probable)	0.974		0.00327315
		gene24733	Ornithine carbamoyltransferase (OTCase) (probable)	-1.192		0.00120672
		gene29012	Orotidine 5'-phosphate decarboxylase (similar to)	-1.176	1.077	0.0239234	0.0300545
		gene28883	Orotidine 5'-phosphate decarboxylase (similar to)	-2.57338		0.0201697
		gene03330	Os01g0858200 (probable)	2.768		0.000403817
		gene05923	Os05g0532800 protein (similar to)		-1.351		0.00345311
		gene13102	Os09g0397300 (similar to)	-1.193		0.0305326
		gene19940	o-succinylbenzoate synthase (OSB synthase) (probable)	0.855		0.0289954
		gene06292	Outer dense fiber protein 2 (probable)	-2.998		0.00742602
		gene23426	Outer membrane usher protein psaC, Precursor (probable)	-2.179		0.0304108
		gene02292	Paramyosin (probable)	-0.922		0.0383715
		gene26902	Parvalbumin beta (similar to)	-2.055		0.0357378
		gene25109	Penicillin-sensitive transpeptidase (probable)	-2.069		0.030684
		gene13600	Pentatricopeptide repeat-containing protein At3g09060 (similar to)	1.224		0.000327106
		gene32117	Pentatricopeptide repeat-containing protein At5g25630 (probable)		2.088		0.0250007
		gene17760	Peptide deformylase (PDF) (similar to)	-1.904		0.0398929
		gene28729	Period circadian protein homolog 3 (rPER3) (probable)		1.778	0	0.0332233
		gene16676	Peroxisome assembly protein 12 (putative)	-1.224		0.00143289
		gene30423	Peroxisome biogenesis factor 10 (AthPEX10) (probable)	-2.806		0.0295268
		gene12184	Perphorin-2 (probable)		1.607		0.0362604
		gene07964	Pescadillo (probable)	-3.104		0.00276755
		gene27497	PH and SEC7 domain-containing protein 3 (probable)	-1.577	1.854	0.0168636	0.0298804
		gene14205	PHD and RING finger domain-containing protein 1 (probable)	2.483	1.379	9.54912e-05	0.00888909
		gene30841	PHD finger protein At5g26210 (probable)	-1.02		0.0304713
		gene27852	PHD finger protein rhinoceros (probable)		0.913		0.0208703
		gene16075	Phenylalanine ammonia-lyase (probable)	-1.168		0.0290729
		gene11149	Phenylalanyl-tRNA synthetase alpha chain (PheRS) (probable)	-1.241		0.0365456
		gene28825	Phenylalanyl-tRNA synthetase beta chain (PheRS) (probable)	-1.693		0.00802344
		gene13671	Phenylalanyl-tRNA synthetase beta chain (PheRS) (similar to)	-1.253	1.921	0.00443273	0.00177853
		gene15638	Phosphoglucosamine mutase (probable)		2.116		0.0153563
		gene26988	Phospholipase A2-like protein Y52B11A.8, Precursor (probable)		-1.199		0.0263072
		gene14035	Phospholipase D p1 (AtPLDp1) (probable)		-0.978		0.00193719
		gene09959	Phospho-N-acetylmuramoyl-pentapeptide-transferase (probable)	-2.761		0.0136364
		gene17595	Phosphoribosylformylglycinamidine cyclo-ligase (probable)	-2.162		0.0494543
		gene08380	Phosphoribosylformylglycinamidine synthase 2 (FGAM synthase II) (probable)	-2.982		0.0113823
		gene24988	Photosystem I P700 chlorophyll a apoprotein A1 (similar to)		2.166		0.0341513
		gene22526	Photosystem I P700 chlorophyll a apoprotein A2 (probable)	-2.534		0.0327312
		gene04502	Phytosulfokine-beta, Precursor (similar to)		-1.395		0.0492852
		gene01962	Plasminogen activator inhibitor 1 (PAI-1), Precursor (probable)	-1.313		0.043904
		gene19207	Poly(A) RNA polymerase cid14 (PAP) (probable)	-0.963	1.195	0.0464621	0.0397627
		gene30854	Probable adenylate kinase 2, chloroplastic (AK 2), Precursor (similar to)	-2.12953		0.0340784
		gene00609	Polyadenylate-binding protein 1-B (Poly(A)-binding protein, cytoplasmic 1-B) (probable)	0.926		0.0391119
		gene20012	Polyadenylate-binding protein 1-B (Poly(A)-binding protein, cytoplasmic 1-B) (probable)	0.891		0.00898498
		gene06517	Polyamine-modulated factor 1-binding protein 1 (PMF-1-binding protein) (probable)		-0.881		0.00114777
		gene03625	Polyglutamine-binding protein 1 (probable)	-0.918		0.0303921
		gene11995	Polyribonucleotide nucleotidyltransferase (PNPase) (probable)		-1.448		0.000269151
		gene01375	Potassium/sodium hyperpolarization-activated cyclic nucleotide-gated channel 2 (BCNG-2) (probable)		-0.957		0.000120641
		gene30066	Potassium-transporting ATPase A chain (probable)	-2.404		0.0164817
		gene28473	Potassium-transporting ATPase subunit beta (probable)		-2.95		0.0111999
		gene08213	PRA1 family protein F2 (AtPRA1.F2) (probable)	1.089		0.00208115
		gene27474	Pre-mRNA 3'-end-processing factor FIP1 (hFip1) (probable)	-1.055		0.00273866
		gene24888	Pre-mRNA-processing factor 39 (probable)		1.275		0.0209385
		gene10744	Pre-mRNA-splicing factor CWC21 (probable)		-1.073		0.0116337
		gene22810	Pre-rRNA-processing protein esf2 (probable)	0.854		0.0106007
		gene26286	PRKR-interacting protein 1 (probable)		-0.824		0.0125718
		gene16800	Probable aquaporin PIP1-2	0.802		0.0149203
		gene00187	Probable carbohydrate esterase At4g34215 (similar to)	2.054		0.0026402
		gene05183	Probable chemoreceptor glutamine deamidase cheD		1.173		0.0167982
		gene17634	Probable cysteine proteinase 361L		1.167		0.0479981
		gene17139	Probable cytochrome c biosynthesis protein		2.689		0.0139785
		gene32466	Probable DNA repair protein Amir_3417		-0.929		0.0489021
		gene13003	Probable E3 ubiquitin-protein ligase HERC4	-0.864		0.0453504
		gene22264	Probable global transcription activator SNF2L2 (hBRM)	-1.43		0.0387897
		gene32586	Probable ion channel DMI1-like, chloroplastic, Precursor		1.746		0.0146092
		gene28813	Probable ion channel DMI1-like, chloroplastic, Precursor (similar to)		0.926		0.0333138
		gene05681	Probable O-sialoglycoprotein endopeptidase (Glycoprotease)	-1.378		0.0125276
		gene00871	Probable pleiotropic drug resistance protein 2	-2.287		0.0245045
		gene09351	Probable polyketide synthase 3 (dipks3)	-1.048		0.0131014
		gene32312	Probable protease htpX homolog	-1.951		0.0196219
		gene28278	Probable RNA-binding protein EIF1AD	-2.41		0.00864077
		gene20308	Probable steroid reductase DET2		1.982		0.0266998
		gene08856	Probable ubiquitin-conjugating enzyme E2 24		1.121		0.025955
		gene23850	Probable WRKY transcription factor 16		1.03		0.0300592
		gene11327	Programmed cell death protein 4 (probable)	-0.976		0.0223237
		gene21836	Prolyl-tRNA synthetase (ProRS) (probable)	-4.436		0.000171648
		gene28427	Proteasome assembly chaperone 3 (probable)	-1.401		0.0149399
		gene14596	Proteasome subunit alpha type-7 (similar to)		-0.962		0.00644318
		gene00890	Protein AIR2 (probable)	-2.258		0.0238715
		gene28656	Protein ALEX (probable)	2.516		0.0194758
		gene31239	Protein bfr-2 (probable)	1.787		0.00999639
		gene29504	Protein BPS1, chloroplastic, Precursor (probable)	-1.712		0.0258225
		gene17250	Protein CHLOROPLAST IMPORT APPARATUS 2, Precursor (probable)	0.815		0.0244258
		gene26014	Protein DCL, chloroplastic, Precursor (probable)		-0.812		0.0138926
		gene01555	Protein EARLY FLOWERING 3 (probable)	-2.082		0.0497165
		gene25674	Protein EFR3 (probable)	-1.036		0.0163494
		gene15595	Protein FAM151A (similar to)	1.416		0.0311073
		gene14766	Protein FAM193A (probable)	-1.447		0.0500052
		gene27732	Protein FAM38B (probable)		1.617		0.00402371
		gene12675	Protein FAM63A (probable)	-2.05		0.00370818
		gene07510	Protein FAM75B (similar to)		2.681		0.00300026
		gene06169	Protein FAM76B (probable)	1.541		0.00241373
		gene31047	Protein FAR1-RELATED SEQUENCE 5 (probable)	-1.385		0.0215561
		gene01223	Protein fmtA, Precursor (probable)	-0.954		0.0173347
		gene04192	Protein furry homolog-like (probable)		0.954		0.0180769
		gene06110	Protein HEX2 (probable)	-1.846		0.0168293
		gene27828	Protein HIR1 (probable)	-1.156	1.377	0.00722326	0.00500041
		gene15145	Protein MAM3 (probable)	-0.964		0.0253692
		gene05800	Protein PHLOEM PROTEIN 2-LIKE A10 (AtPP2-A10) (probable)	1.057		0.0190671
		gene20050	Protein PHLOEM PROTEIN 2-LIKE A9 (AtPP2-A9) (probable)	-0.876		0.0398704
		gene09047	Protein piccolo (probable)	-0.857		0.012337
		gene24506	Protein PLASTID MOVEMENT IMPAIRED 2 (probable)	1.096		0.00600819
		gene11038	Protein RIC1 homolog (probable)	-0.903	1.113	0.019539	0.0126994
		gene13988	Protein RIC1 homolog (probable)	-1.394		0.0139607
		gene09662	Protein SFRS12IP1 (probable)		1.216		0.0139255
		gene15691	Protein Shroom2 (probable)	0.903		0.0334369
		gene15353	Protein SMG7 (probable)		0.875		0.0128669
		gene02187	Protein split ends (probable)	1.908		0.0221507
		gene31664	Protein split ends (probable)		1.536		0.00441469
		gene09533	Protein TANC1 (probable)		-1.742		0.0141432
		gene27706	Protein TAP1 precursor (probable)	1.446		0.0140108
		gene08049	Protein TIF31 homolog (probable)		2.303		0.0189146
		gene05930	Protein translocase subunit secA (probable)	-1.25	1.882	0.0483097	0.0212741
		gene08925	Protein transport protein Sec16B (RGPR-p117) (probable)		1.006		0.00613313
		gene03005	Protein Wnt-1 (probable)	-1.068		0.0140109
		gene21625	PTB domain-containing engulfment adapter protein 1 (GULP) (probable)	-2.392		0.0260868
		gene04338	Putative amino acid permease F13H10.3 (probable)		-1.437		0.014619
		gene10423	Putative apospory-associated protein C (probable)	-1.793		0.000146848
		gene18621	Putative clathrin assembly protein At2g25430 (similar to)	0.958		0.0182939
		gene27873	Putative cytochrome P450 71A28 (probable)		-1.528		0.032395
		gene07502	Putative DNA helicase ino80 (probable)	-1.079		0.0240718
		gene12760	Putative FBD-associated F-box protein At5g56560 (probable)	-1.253		0.0444292
		gene02288	Putative F-box protein At1g47790 (probable)	-1.403		0.024875
		gene15570	Putative F-box/FBD/LRR-repeat protein At4g03220 (probable)	-0.873	0.861	0.0320547	0.0474649
		gene10794	Putative golgin subfamily A member 6-like protein 4 (probable)		-0.808		0.017376
		gene02125	Putative high mobility group protein B3-like protein (probable)	-2.522		0.0219113
		gene19317	Putative mediator of RNA polymerase II transcription subunit 12 (probable)		0.841		0.0364706
		gene16859	Putative membrane protein ycf1 (RF1) (probable)	-0.874		0.0248445
		gene32047	Putative metabolite transport protein yaaU (probable)	-4.04		0.00170373
		gene23373	Putative pectate lyase 2, Precursor (probable)	-2.461		0.0168668
		gene22403	Putative potassium channel regulatory protein unc-93 (probable)	-2.498		0.0367785
		gene08817	Putative pre-mRNA-splicing factor ATP-dependent RNA helicase DHX16 (probable)	-1.677		0.00112565
		gene13227	Putative protein FAR1-RELATED SEQUENCE 10 (probable)		-0.852		0.0426326
		gene25847	Putative protein TPRXL (probable)		0.904		0.00583694
		gene05119	Putative ribonuclease H protein At1g65750 (probable)	-2.148		0.014873	0
		gene08791	Putative ribonuclease H protein At1g65750 (probable)		2.151		0.0125979
		gene25469	Putative ribonuclease H protein At1g65750 (probable)	1.441		0.01404
		gene31671	Putative ribonuclease H protein At1g65750 (probable)	1.482	1.824	0.0107143	0.00358963
		gene03809	Putative S-adenosylmethionine decarboxylase (Fragment) (similar to)	-1.246		0.0077457
		gene32620	Putative UPF0481 protein At3g02645 (probable)		1.876		0.0281238
		gene17672	Putative vacuolar protein sorting-associated protein 13B (probable)		1.47		0.0478712
		gene05267	Putative zinc finger protein At1g68190 (similar to)	1.76		0.0376901
		gene30900	PXMP2/4 family protein 4 (probable)		-0.803		0.025718
		gene04206	Pyruvate dehydrogenase [NADP+], mitochondrial, Precursor (probable)		1.622		0.00619914
		gene08552	Rac-like GTP-binding protein ARAC1, Precursor (similar to)	-0.814		0.0153996
		gene20284	Ran GTPase-activating protein 1 (RanGAP1) (probable)	-1.496		0.0168171
		gene21316	RE1-silencing transcription factor (probable)	-2.333		0.0042646
		gene20872	RecQ-mediated genome instability protein 2 (probable)	1.12		0.0178271
		gene27925	Regulation of nuclear pre-mRNA domain-containing protein 1B (probable)	-0.866		0.0301006
		gene13779	Regulator of chromosome condensation (probable)	-2.913		0.0126934
		gene29489	Regulator of chromosome condensation (similar to)	1.701		0.0241927
		gene01344	Regulator of nonsense transcripts 3A (probable)	2.177		0.0340754
		gene26054	Regulatory protein E2 (probable)	-1.283		0.0261053
		gene08895	Rho guanine nucleotide exchange factor 7 (probable)	-0.865		0.0404355
		gene02675	Ribonuclease 2 (probable)	1.243		0.0105086
		gene00197	Ribonuclease 3 (RNase III) (probable)		-1.385		0.0169132
		gene02270	Ribonucleoside-diphosphate reductase subunit alpha (probable)	-1.464		0.00016116
		gene02490	Ribosomal protein L11 methyltransferase (L11 Mtase) (probable)	1.294	0.903	2.53824e-05	0.00068892
		gene31562	Ribosomal RNA large subunit methyltransferase N (probable)	-1.188		0.0397246
		gene07782	RING finger protein 151 (probable)		0.824		0.0433686
		gene28163	RING finger protein 160 (Zfp-294) (probable)		1.28		0.00392564
		gene24778	RING finger protein 165 (probable)		-1.368		0.0394472
		gene27101	RNA polymerase II transcription factor SIII subunit A3 (EloA3) (probable)		-2.658		0.00828092
		gene25661	RNA/RNP complex-1-interacting phosphatase (probable)	-1.18		0.00285812
		gene05625	RNA-binding protein 33 (probable)	-1.851		0.013021
		gene21662	RNA-binding protein 33 (probable)	-1.233		0.0010107
		gene22480	RNA-binding protein with serine-rich domain 1 (probable)	1.885		0.0412693
		gene27453	RNA-directed RNA polymerase (probable)	2.3		0.0493062
		gene26533	Roundabout homolog 3, Precursor (probable)	-1.297		0.0398863
		gene25166	Salivary glue protein Sgs-3, Precursor (probable)	-2.267		0.000651893
		gene18113	SAP domain-containing ribonucleoprotein (probable)		0.815		0.0164963
		gene07438	Serine/arginine repetitive matrix protein 1 (probable)		1.267		0.00266118
		gene11840	Serine/arginine repetitive matrix protein 1 (SRm160) (probable)		-1.07		0.000935091
		gene20276	Serine/arginine repetitive matrix protein 2 (Ser/Arg-related nuclear matrix protein) (probable)		1.096		0.0121403
		gene13588	Serine/threonine-protein phosphatase PP-Z (probable)	0.974		0.00264906
		gene22506	Serine-rich adhesin for platelets, Precursor (probable)	0.945		0.00949419
		gene13520	SET-binding protein (SEB) (similar to)	-1.375		0.0372959
		gene23777	SH3 domain-binding protein 1 (3BP-1) (probable)	2.202		0.00699708
		gene24070	SH3 domain-containing protein C23A1.17 (probable)		0.824		0.0095518
		gene08915	Shugoshin-2 (probable)		1.655		0.0124083
		gene12805	Signal recognition particle 54 kDa protein 2 (SRP54) (similar to)		1.583		0.00886536
		gene18328	Ski oncogene (similar to)	1.218		0.00744148
		gene18505	SKP1-like protein 1B (probable)	1.22		0.0431018
		gene01582	Slender lobes-like protein (probable)	-1.479		0.0419434
		gene16544	Slit homolog 2 protein C-product, Precursor (probable)		2.742		0.00282105
		gene03389	Smoothelin (probable)	-3.931		0.00324285
		gene19020	Sodium channel protein type 4 subunit alpha A (probable)		1.468		0.0152604
		gene05920	Somatolactin (SL), Precursor (probable)	-3.852		0.00118112
		gene21129	Spatacsin (probable)		1.117		0.0358499
		gene01752	Sperm protamine-P1 (probable)	1.217	-1.161	0.000210639	0.000397778
		gene11577	Spermidine synthase (PAPT) (probable)		-0.832		0.0390498
		gene24754	Splicing factor 1 (BBP) (probable)		0.866		0.0197806
		gene17809	Spore coat protein SP85, Precursor (probable)	-1.481		0.0121412
		gene16444	Staphylococcal secretory antigen ssaA2, Precursor (probable)		0.936		0.0131307
		gene19560	Stress response protein nst1 (probable)	-2.242		0.00269586
		gene21313	Structural maintenance of chromosomes protein 1 (probable)	-1.815		0.0124079
		gene22352	Structural maintenance of chromosomes protein 4 (probable)	1.434		0.0097189
		gene02487	Subtilisin-like protease, Precursor (probable)	2.449	2.086	0.0199886	0.0191207
		gene26467	Succinyl-CoA ligase [ADP-forming] subunit beta (SCS-beta) (probable)		1.492		0.0174643
		gene23448	Sulfate/thiosulfate import ATP-binding protein cysA (probable)	2.092		0.0231076
		gene06583	Survival factor 1 (probable)	-1.99		0.00130978
		gene29470	Synaptojanin-1 (probable)		-1.131		0.0359013
		gene27496	Synaptotagmin-like protein 2 (probable)	-0.983		0.0241339
		gene19834	Taste receptor type 2 member 105 (T2R105) (probable)	-1.55		0.0434692
		gene06162	TBC1 domain family member 5 homolog B (probable)	1.104		0.00415475
		gene23094	T-complex protein 1 subunit delta (TCP-1-delta) (probable)		-1.423		0.0267836
		gene16495	Tektin-3 (probable)	-1.22	1.105	0.0186048	0.0259383
		gene29357	Testis-expressed sequence 13A protein (probable)	0.894		0.0419521
		gene34439	Thioredoxin H-type (similar to)	1.852		0.0324619
		gene22304	Thylakoid lumenal 19 kDa protein, chloroplastic, Precursor (probable)	-2.112		0.0376906
		gene16897	Thyroid receptor-interacting protein 11 (TRIP-11) (probable)	-0.923		0.045285
		gene07406	Tight junction protein ZO-1 (probable)	-1.857		0.00764362
		gene11399	Toluene-4-monooxygenase system protein D (probable)	-1.876		0.00986629
		gene30325	Trans-acting T-cell-specific transcription factor GATA-3 (probable)		-1.072		0.0375453
		gene23919	Transcription factor CPC (similar to)	-0.874		0.0153486
		gene10013	Transcription initiation factor TFIID subunit 2 (probable)	2.984		0.00131847
		gene26100	Transcription initiation factor TFIID subunit 3 (probable)		-0.999		0.0030085
		gene29289	Transcriptional regulator ATRX homolog (probable)		-0.943		0.0202962
		gene21542	Transcriptional regulator Kaiso (probable)		-2.496		0.018377
		gene20085	Transforming growth factor-beta receptor-associated protein 1 homolog (TGF-beta receptor-associated protein 1 homolog) (probable)		1.001		0.0096726
		gene13575	Transient-receptor-potential-like protein (probable)	-1.181		0.000339109
		gene15769	Transketolase (TK) (probable)	-1.832		0.0202986
		gene01787	Translation initiation factor IF-2 (probable)		-1.343		0.0190792
		gene05544	Translation initiation factor IF-2 (probable)	-1.807		0.0142854
		gene05781	Translation initiation factor IF-2 (probable)	1.143		0.000130661
		gene11236	Translation initiation factor IF-2 (probable)	0.995		0.0326971
		gene19134	Translation initiation factor IF-2 (probable)	0.86		0.0205604
		gene24006	Translation initiation factor IF-2 (probable)		-1.054		0.00458942
		gene25055	Translation initiation factor IF-2 (probable)	0.902	-0.829	0.0252122	0.041672
		gene06814	Translationally-controlled tumor protein homolog (TCTP) (putative)	-1.252		0.00172063
		gene29826	Translocase of chloroplast 159, chloroplastic (AtToc159) (probable)		-0.955		0.00405984
		gene17003	Transmembrane protein (probable)		1.189		0.00853732
[truncated: 322 more rows]

## Sheet: S. Table 6
	Supplemental Table 6.Functionally enriched classes in the in the DE genes of white inoculated (WI) and red inoculated (RI) fruits, using AgriGO analysis tool. C, Cellular Component; F, Molecular Function; P, Biological Process.
	Fruit	GO term	Ontology	Description	Number in input list	Number in BG/Ref	FDR
	WI	GO:0006950	P	response to stress	39	521	0.00077
		GO:0009607	P	response to biotic stimulus	7	44	0.0025
		GO:0009628	P	response to abiotic stimulus	7	55	0.0089
		GO:0050896	P	response to stimulus	46	650	0.00093
		GO:0019748	P	secondary metabolic process	9	76	0.0052
		GO:0005975	P	carbohydrate metabolic process	49	774	0.0057
	RI	GO:0006950	P	response to stress	31	521	0.0066
		GO:0044267	P	cellular protein metabolic process	110	2260	0.0031
		GO:0006412	P	translation	45	587	5.4e-06
		GO:0050896	P	response to stimulus	41	650	0.00077
		GO:0004872	F	receptor activity	17	233	0.0058
		GO:0005215	F	transporter activity	50	893	0.0028
		GO:0005737	C	cytoplasm	64	1108	0.00043
		GO:0016020	C	membrane	99	2085	0.0084

## Sheet: S. Table 7
	Supplemental Table 7. Subsets of F. vesca genes in the significantly enriched ontology.
	White fruit																														Red fruit
	Response to stress (GO:0006950; Ontology: Biological process, P)					Response to stimulus (GO:0050896; Ontology: Biological process, P)					Response to biotic stimulus (GO:0009607; Ontology: Biological process, P)					Response to abiotic stimulus (GO:0009628; Ontology: Biological process, P)					Secondary metabolic process (GO:0019748; Ontology: Biological process, P)					Carbohydrate metabolic process (GO:0005975; Ontology: Biological process, P)					Response to stress (GO:0006950; Ontology: Biological process, P)					Response to stimulus (GO:0050896; Ontology: Biological process, P)					Cellular protein metabolic process (GO:0044267; Ontology: Biological process, P)					Translation (GO:0006412; Ontology: Biological process, P)
	Gene ID	Annotation	Fold change (log2)	P-value		Gene ID	Annotation	Fold change (log2)	P-value		Gene ID	Annotation	Fold change (log2)	P-value		Gene ID	Annotation	Fold change (log2)	P-value		Gene ID	Annotation	Fold change (log2)	P-value		Gene ID	Annotation	Fold change (log2)	P-value		Gene ID	Annotation	Fold change (log2)	P-value		Gene ID	Annotation	Fold change (log2)	P-value		Gene ID	Annotation	Fold change (log2)	P-value		Gene ID	Annotation	Fold change (log2)	P-value
	gene25012	Major pollen allergen Bet v 1-B (probable)	-3.78861	0.0303704		gene25012	Major pollen allergen Bet v 1-B (probable)	-3.78861	0.0303704		gene05122	Major allergen Pru av 1 (putative)	2.15608	0.00302818		gene01553	BTB/POZ domain-containing protein At5g48800 (probable)	-2.34071	0.0363344		gene09367	Ketose-bisphosphate aldolase class-II family protein	-1.28145	0.0121535		gene11353	Myo-inositol oxygenase 2	-3.03672	0.00316414		gene17995	Activator of 90 kDa heat shock protein ATPase homolog (probable)	-1.44216	0.002542		gene23388	Putative disease resistance protein At5g47280 (probable)	-2.04068	0.0289083		gene07957	Lysyl-tRNA synthetase	-3.12184	0.0450208		gene07957	Lysyl-tRNA synthetase (LysRS) (similar to)	-3.12184	0.0450208
	gene04560	U3 small nucleolar RNA-associated protein 10 (probable)	-3.68632	0.00803998		gene04560	U3 small nucleolar RNA-associated protein 10 (probable)	-3.68632	0.00803998		gene05123	Major allergen Pru av 1 (putative)	1.61566	0.019216		gene08617	Dehydrin COR47 (probable)	0.826267	0.0341267		gene28873	Probable 3-hydroxyisobutyrate mitochondrial	-0.925994	0.00336891		gene12626	4)-beta-D-galactanase	-2.76681	0.00331866		gene01331	Peroxidase 55 (Atperox P55), Precursor (putative)	-1.43971	0.0147845		gene17995	Activator of 90 kDa heat shock protein ATPase homolog (probable)	-1.44216	0.002542		gene13189	Heat shock 90-1	-2.13435	7.07659e-06		gene05751	60S ribosomal protein L26-1 (putative)	-1.40854	0.0039372
	gene03058	TMV resistance protein N (probable)	-2.60496	0.0252996		gene23280	Auxin response factor 16	-3.21296	0.00327446		gene07064	Major allergen Pru ar 1 (putative)	2.52369	0.00352985		gene11969	Serine/threonine-protein kinase SAPK2 (putative)	-1.02546	0.015705		gene17621	Laccase-9/ Laccase-15, Precursor (probable)	-0.87604	0.0127171		gene20103	Alpha-glucosidase	-2.51299	0.0480602		gene17137	TMV resistance protein N (probable)	0.87446	0.0297272		gene01331	Peroxidase 55	-1.43971	0.0147845		gene13191	Heat shock 90-1	-1.63602	0.0068432		gene05358	60S ribosomal protein L26-1 (putative)	-1.35571	0.00549335
	gene19725	Probable GMP synthase [glutamine-hydrolyzing]	-2.53165	0.00651374		gene03058	TMV resistance N	-2.60496	0.0252996		gene07065	Major allergen Pru av 1 (putative)	1.76285	0.00854801		gene12886	Dof zinc finger protein DOF3.2 (AtDOF3.2) (probable)	-0.8358	0.0134732		gene27907	6-phosphogluconate dehydrogenase family protein	1.01735	0.000230686		gene04238	Cytochrome P450 85A	-2.35798	0.00392847		gene15471	Pentatricopeptide repeat-containing protein At5g24830 (probable)	0.880731	0.0227162		gene12462	Detoxification 14	-0.828679	0.0405968		gene00688	Proline-rich receptor kinase PERK12	-1.45553	0.0450193		gene25119	30S ribosomal protein S6 alpha, chloroplastic, Precursor (similar to)	-1.19072	0.0275698
	gene32562	Inhibitor of trypsin and hageman factor (similar to)	-2.50008	0.0439249		gene19725	Probable GMP synthase	-2.53165	0.00651374		gene07080	Major allergen Pru av 1 (similar to)	-1.48351	0.0395312		gene17631	BTB/POZ domain-containing protein At5g48800 (similar to)	1.46173	0.0256493		gene21346	Probable chalcone-flavonone isomerase 3	1.20965	0.0110494		gene09622	Phosphoglycerate chloroplastic	-2.20037	0.00890353		gene33936	Disease resistance protein At4g27190 (probable)	0.944148	0.0491584		gene12035	Detoxification 27	0.826785	0.0153498		gene05751	60S ribosomal L26-1	-1.40854	0.0039372		gene03036	Putative 60S ribosomal protein L37a-1 (similar to)	-1.15621	0.00199304
	gene24787	TMV resistance protein N (similar to)	-2.46472	0.0196224		gene32562	Inhibitor of trypsin and hageman factor (similar to)	-2.50008	0.0439249		gene07088	Major allergen Pru av 1 (putative)	1.45339	0.0252573		gene28060	Root phototropism protein 2 (putative)	1.3683	0.0267281		gene23367	Chalcone-flavonone isomerase 1	1.34738	0.000882241		gene20640	Beta-glucosidase 10	-2.13605	0.00667242		gene08120	Abscisic stress-ripening protein 2 (similar to)	0.974358	0.000695356		gene17137	Suppressor of npr1- constitutive 1	0.87446	0.0297272		gene06629	70 kDa peptidyl-prolyl isomerase	-1.38417	0.00240254		gene12464	60S acidic ribosomal protein P1 (probable)	-1.10006	0.00051953
	gene02401	TMV resistance protein N (similar to)	-2.40869	0.020556		gene24787	TMV resistance N	-2.46472	0.0196224		gene25012	Major pollen allergen Bet v 1-B (probable)	-3.78861	0.0303704		gene31902	Serine/threonine-protein kinase SRK2E (SnRK2.6) (putative)	-1.02405	0.00664546		gene12086	Laccase-14/Putative laccase-9, Precursor (probable)	1.58705	0.00429108		gene10423	Putative apospory-associated protein C (probable)	-1.79259	0.000146848		gene24813	TMV resistance protein N (similar to)	1.01015	0.0485082		gene15471	Pentatricopeptide (PPR) repeat-containing protein	0.880731	0.0227162		gene09656	Polyubiquitin	-1.37688	0.0090087		gene25115	60S ribosomal protein L27 (similar to)	-1.08833	0.0470949
	gene26195	Titin (probable)	-2.12352	0.0342171		gene02401	TMV resistance N	-2.40869	0.020556												gene27557	Laccase-9	1.63169	0.0309206		gene05877	Probable polygalacturonase	-1.62685	0.0395178		gene23846	TMV resistance protein N (probable)	1.03275	0.0195143		gene33936	Disease resistance At4g27190	0.944148	0.0491584		gene05358	60S ribosomal L26-1	-1.35571	0.00549335		gene20118	60S ribosomal protein L27a-2 (similar to)	-1.06318	0.00235011
	gene20655	TMV resistance protein N (similar to)	-2.12004	0.0338199		gene01553	BTB POZ domain-containing At5g67385	-2.34071	0.0363344												gene24296	Laccase-21/ Putative laccase-9, Precursor (probable)	2.72475	0.0207092		gene01363	Glycerophosphodiester phosphodiesterase chloroplastic	-1.54713	0.0235442		gene21129	Spatacsin (probable)	1.11665	0.0358499		gene11129	Detoxification 41	0.944794	0.0441723		gene04521	Heat shock 90- chloroplastic	-1.31803	0.00028448		gene08322	60S ribosomal protein L23	-1.03504	0.0159433
	gene01294	TMV resistance protein N (probable)	-1.98061	0.0342469		gene11929	Detoxification 16	-2.18675	0.0248709																	gene28728	Callose synthase 7	-1.44659	0.046964		gene11969	Serine/threonine-protein kinase SAPK2 (putative)	1.12888	0.0464146		gene08120	Abscisic stress-ripening protein 2 (similar to)	0.974358	0.000695356		gene02729	Chaperonin CPN60- mitochondrial	-1.24233	0.00185406		gene21888	60S acidic ribosomal protein P2 (similar to)	-0.9966	0.0216772
	gene31994	TMV resistance protein N (similar to)	-1.96519	0.00193752		gene26195	Titin (probable)	-2.12352	0.0342171																	gene00291	Glucose-6-phosphate dehydrogenase 4	-1.29838	0.00301336		gene16534	TMV resistance protein N (probable)	1.13195	0.0256555		gene24813	TMV resistance N	1.01015	0.0485082		gene25119	30S ribosomal S6 chloroplastic	-1.19072	0.0275698		gene24338	60S ribosomal protein L27 (similar to)	-0.993193	0.0193038
	gene24446	Formin-like protein 20 (AtFH20) (similar to)	-1.65475	0.00882638		gene20655	TMV resistance N	-2.12004	0.0338199																	gene09367	Ketose-bisphosphate aldolase class-II family protein	-1.28145	0.0121535		gene08354	TMV resistance protein N (similar to)	1.17251	0.0358742		gene23846	Probable WRKY transcription factor 19	1.03275	0.0195143		gene13500	Polyubiquitin	-1.17677	0.00910567		gene24881	60S ribosomal protein L32-1 (putative)	-0.991204	0.0276014
	gene13372	TMV resistance protein N (probable)	-1.64301	0.00915449		gene01294	TMV resistance N	-1.98061	0.0342469																	gene30789	Synaptotagmin-5/ Polygalacturonase (PG), Precursor (probable)	-1.26186	0.0063346		gene01635	Transcriptional activator DEMETER (probable)	1.29089	0.0237055		gene26473	Detoxification 42	1.07158	0.0275145		gene03036	60S ribosomal L37a-1	-1.15621	0.00199304		gene21570	60S ribosomal protein L12	-0.977025	0.0334221
	gene02467	DNA ligase 1 (similar to)	-1.54687	0.0330556		gene31994	TMV resistance N	-1.96519	0.00193752																	gene08646	1,4-alpha-glucan-branching enzyme	-1.20539	0.000609203		gene06044	Cryptochrome-1 (probable)	1.34479	0.0291832		gene01628	Detoxification chloroplastic	1.0772	0.00171683		gene01495	Heat shock cognate 80	-1.11655	0.0218284		gene03828	60S ribosomal protein L34 (putative)	-0.976407	0.00948667
	gene07080	Major allergen Pru av 1 (similar to)	-1.48351	0.0395312		gene09430	Detoxification 16	-1.92239	0.0219468																	gene06720	Inactive beta-amylase 9	-1.10392	0.0112324		gene29744	TMV resistance protein N (similar to)	1.45214	0.0133372		gene02234	Auxin response factor 17	1.10667	0.041098		gene12464	60S acidic ribosomal P1	-1.10006	0.00051953		gene28433	50S ribosomal protein L12-1, chloroplastic, Precursor (similar to)	-0.974262	0.0360684
	gene32561	Glu S.griseus protease inhibitor (similar to)	-1.31012	0.034837		gene24446	Formin 20	-1.65475	0.00882638																	gene13488	UDP-N-acetylglucosamine transferase subunit ALG13	-1.08327	0.0365994		gene07064	Major allergen Pru ar 1 (putative)	1.53119	0.0152095		gene21129	Spatacsin (probable)	1.11665	0.0358499		gene25115	60S ribosomal L27	-1.08833	0.0470949		gene09726	60S ribosomal protein L12 (similar to)	-0.959492	0.013472
	gene18733	hypothetical protein	-1.29369	0.00191169		gene13372	TMV resistance N	-1.64301	0.00915449																	gene30841	PHD finger protein At5g26210 (probable)	-1.02006	0.0304713		gene24446	Formin-like protein 20 (AtFH20) (similar to)	1.70506	0.0166845		gene11969	Osmotic stress abscisic acid-activated kinase 8	1.12888	0.0464146		gene20118	Resistance to Pseudomonas syringae 3	-1.06318	0.00235011		gene25981	40S ribosomal protein S9-2 (similar to)	-0.955635	0.00697304
	gene10758	Peroxidase 20 (Atperox P20), Precursor (similar to)	-1.26673	0.0222907		gene02467	DNA ligase 1	-1.54687	0.0330556																	gene06528	4)-beta-D-galactanase	-1.00142	0.0146523		gene31994	TMV resistance protein N (similar to)	1.84269	0.00571147		gene16534	TMV resistance N	1.13195	0.0256555		gene29751	Homolog subfamily B member 13	-1.0357	0.0118255		gene25924	Ribosome-recycling factor (RRF) (probable)	-0.951557	0.00583295
	gene15459	Putative endonuclease FLJ39025 (probable)	-1.25443	0.0413819		gene07080	Major allergen Pru av 1	-1.48351	0.0395312																	gene17105	Lipid x 4 -kinase	-0.993792	0.00356055		gene30565	Pathogenesis-related protein PR-4B, Precursor (similar to)	1.92688	0.0219763		gene08354	TMV resistance N	1.17251	0.0358742		gene08322	60S ribosomal L23	-1.03504	0.0159433		gene10059	40S ribosomal protein S12 (similar to)	-0.951301	0.035421
	gene16053	TMV resistance protein N (probable)	-1.16722	0.00403767		gene32561	Glu S.griseus protease inhibitor (similar to)	-1.31012	0.034837																	gene15210	Beta-galactosidase 5	-0.958863	0.0469341		gene24401	TMV resistance protein N (similar to)	1.95844	0.024774		gene30394	Auxin response factor 6	1.19594	0.00105867		gene21888	60S acidic ribosomal P2	-0.9966	0.0216772		gene18486	50S ribosomal protein L17 (similar to)	-0.939628	0.00323469
	gene11969	Serine/threonine-protein kinase SAPK2 (putative)	-1.02546	0.015705		gene18733	hypothetical protein	-1.29369	0.00191169																	gene26910	Xylulose kinase, putative	-0.955544	0.00889594		gene09920	TMV resistance protein N (similar to)	2.03483	0.0376822		gene12224	Auxin response factor 19	1.29038	0.00379117		gene24338	60S ribosomal L27	-0.993193	0.0193038		gene23119	60S ribosomal protein L28-1 (putative)	-0.934007	0.00651866
	gene31902	Serine/threonine-protein kinase SRK2E (SnRK2.6) (putative)	-1.02405	0.00664546		gene10758	Peroxidase 20	-1.26673	0.0222907																	gene28873	Probable 3-hydroxyisobutyrate mitochondrial	-0.925994	0.00336891		gene07078	Major allergen Pru ar 1 (probable)	2.12673	0.0210767		gene01635	Transcriptional activator DEMETER	1.29089	0.0237055		gene24881	60S ribosomal L32-1	-0.991204	0.0276014		gene04328	Tyrosyl-tRNA synthetase (TyrRS) (probable)	-0.918116	0.0102931
	gene16534	TMV resistance protein N (probable)	-1.00863	0.0106996		gene12461	Detoxification 16	-1.25455	0.0478367																	gene15604	Glucose-6-phosphate dehydrogenase 1	-0.921465	0.0499113		gene32302	Deoxyribodipyrimidine photo-lyase (similar to)	2.15466	0.0143867		gene06044	UV repair defective 3	1.34479	0.0291832		gene21570	60S ribosomal L12	-0.977025	0.0334221		gene15334	40S ribosomal protein S17 (similar to)	-0.914251	0.0256024
	gene04856	TMV resistance protein N (probable)	-0.900463	0.0331656		gene15459	Endonuclease V	-1.25443	0.0413819																	gene30155	Fructose-bisphosphate cytoplasmic isozyme 2	0.835907	0.000788505		gene00894	Lignin-forming anionic peroxidase, Precursor (similar to)	2.32159	0.0181593		gene29744	Suppressor of npr1- constitutive 1	1.45214	0.0133372		gene03828	60S ribosomal L34	-0.976407	0.00948667		gene20127	60S ribosomal protein L8-3 (similar to)	-0.912935	0.0110035
	gene12886	Dof zinc finger protein DOF3.2 (AtDOF3.2) (probable)	-0.8358	0.0134732		gene16053	TMV resistance N	-1.16722	0.00403767																	gene18539	Phosphoglycerate cytosolic	0.840173	0.000437956		gene02308	Universal stress protein A-like protein (similar to)	2.33427	0.02718		gene07064	Major allergen Pru av 1	1.53119	0.0152095		gene28433	50S ribosomal L12- chloroplastic	-0.974262	0.0360684		gene25329	40S ribosomal protein S23	-0.912119	0.0363546
	gene21268	Cryptochrome DASH, chloroplastic/mitochondrial, Precursor (probable)	-0.819041	0.0355378		gene11969	Osmotic stress abscisic acid-activated kinase 8	-1.02546	0.015705																	gene27180	Malate dehydrogenase 1	0.852128	0.00175102		gene14188	TMV resistance protein N (probable)	2.33436	0.00785855		gene15073	Detoxification 33	1.64472	0.00585409		gene13913	Ubiquitin-60S ribosomal L40	-0.967685	0.0254558		gene11132	40S ribosomal protein S5-2	-0.905295	0.0216119
	gene03721	Universal stress protein A-like protein (probable)	-0.813562	0.00719621		gene31902	Serine threonine- kinase SRK2E	-1.02405	0.00664546																	gene28316	Beta-amylase chloroplastic	0.867729	0.000697629		gene03058	TMV resistance protein N (probable)	2.40073	0.0376995		gene24446	Formin 20	1.70506	0.0166845		gene09726	60S ribosomal L12	-0.959492	0.013472		gene20620	60S ribosomal protein L31 (similar to)	-0.901079	0.0107585
	gene08617	Dehydrin COR47 (probable)	0.826267	0.0341267		gene16534	TMV resistance N	-1.00863	0.0106996																	gene18538	Phosphoglycerate chloroplastic	0.8729	0.00558972		gene24440	Mitogen-activated protein kinase kinase kinase 1 (MAP kinase kinase kinase 1) (similar to)	2.43891	0.00430802		gene31994	TMV resistance N	1.84269	0.00571147		gene25981	40S ribosomal S9-2	-0.955635	0.00697304		gene05155	60S ribosomal protein L29-1 (similar to)	-0.89843	0.0287978
	gene22595	DNA excision repair protein ERCC-1 (AtERCC1) (similar to)	0.84421	0.0151505		gene04856	Suppressor of NPR1-1, consitutive 1	-0.900463	0.0331656																	gene29858	3)-beta-glucan endohydrolase	0.881189	0.0457707		gene05105	Peroxidase 29 (Atperox P29), Precursor (probable)	2.50713	0.0114421		gene30565	Pathogenesis-related PR-4B	1.92688	0.0219763		gene31375	Cullin-1	-0.954068	0.00885132		gene02142	40S ribosomal protein S16	-0.892824	0.0290679
	gene25040	Mucin-1 subunit beta, Precursor (probable)	0.866126	0.00876723		gene12886	Dof zinc finger protein DOF3.2 (AtDOF3.2) (probable)	-0.8358	0.0134732																	gene06739	Embryo defective 1270	0.884455	0.046319		gene22077	Biotin carboxylase (probable)	2.72794	0.00178613		gene24401	TMV resistance N	1.95844	0.024774		gene25924	Ribosome-recycling factor	-0.951557	0.00583295		gene26004	60S ribosomal protein L34 (similar to)	-0.882572	0.0469262
	gene10080	Probable GMP synthase [glutamine-hydrolyzing]	0.924047	0.00477638		gene21268	Pheophytin pheophorbide hydrolase	-0.819041	0.0355378																	gene08290	Polygalacturonase	0.888593	0.0168835		gene28142	Cationic peroxidase 1, Precursor (putative)	3.1609	0.0129823		gene09920	TMV resistance N	2.03483	0.0376822		gene10059	40S ribosomal S12	-0.951301	0.035421		gene08780	60S ribosomal protein L37-3 (similar to)	-0.882342	0.0429545
	gene10611	Blue-light photoreceptor PHR2 (similar to)	1.02473	0.000530934		gene03721	Universal stress protein A-like protein (probable)	-0.813562	0.00719621																	gene10422	ADP-glucose phosphorylase	0.910837	0.00210302							gene07078	Major allergen Pru ar 1	2.12673	0.0210767		gene13420	Peptidyl-prolyl cis-trans isomerase FKBP53	-0.942845	0.00225456		gene30245	60S acidic ribosomal protein P2 (similar to)	-0.880773	0.0399942
	gene07088	Major allergen Pru av 1 (putative)	1.45339	0.0252573		gene08617	Dehydrin COR47 (probable)	0.826267	0.0341267																	gene05501	Mannan endo-1,4-beta-mannosidase 4	1.00463	0.00839432							gene32302	Deoxyribodipyrimidine photo-lyase	2.15466	0.0143867		gene18486	50S ribosomal L17	-0.939628	0.00323469		gene22275	60S ribosomal protein L27a-3 (putative)	-0.877733	0.0335888
	gene05123	Major allergen Pru av 1 (putative)	1.61566	0.019216		gene22595	E3 ubiquitin- ligase ATL6	0.84421	0.0151505																	gene18624	Pyruvate dehydrogenase E1 component subunit alpha-3, chloroplastic	1.01188	0.00709488							gene00894	Lignin-forming anionic peroxidase	2.32159	0.0181593		gene23119	60S ribosomal L28-1	-0.934007	0.00651866		gene17157	60S ribosomal protein L8-3 (similar to)	-0.874976	0.0301145
	gene06044	Cryptochrome-1 (probable)	1.69034	0.0157832		gene25040	Phosphorylated of 32 kDa	0.866126	0.00876723																	gene21228	Acid beta-fructofuranosidase	1.01288	0.0128571							gene02308	Universal stress A	2.33427	0.02718		gene04328	Tyrosyl-tRNA synthetase	-0.918116	0.0102931		gene11461	60S ribosomal protein L5 (similar to)	-0.867445	0.0345019
	gene07065	Major allergen Pru av 1 (putative)	1.76285	0.00854801		gene10080	Probable GMP synthase	0.924047	0.00477638																	gene18709	Dolichyl-diphosphooligosaccharide-- glycosyltransferase 48 kDa subunit	1.01693	0.0191944							gene14188	TMV resistance N	2.33436	0.00785855		gene15334	40S ribosomal S17	-0.914251	0.0256024		gene30528	40S ribosomal protein S11-1 (putative)	-0.861943	0.0334698
	gene05122	Major allergen Pru av 1 (putative)	2.15608	0.00302818		gene10611	Blue-light photoreceptor PHR2	1.02473	0.000530934																	gene27907	6-phosphogluconate dehydrogenase family protein	1.01735	0.000230686							gene03058	TMV resistance N	2.40073	0.0376995		gene20127	60S ribosomal L8-3	-0.912935	0.0110035		gene08275	60S ribosomal protein L14-2 (putative)	-0.851621	0.0461476
	gene07064	Major allergen Pru ar 1 (putative)	2.52369	0.00352985		gene28060	Root phototropism 2	1.3683	0.0267281																	gene29698	Cellulose synthase A catalytic subunit 8	1.05482	0.0319539							gene24440	Disease resistance At4g27190	2.43891	0.00430802		gene25329	40S ribosomal S23	-0.912119	0.0363546		gene08904	50S ribosomal protein L5, chloroplastic (similar to)	-0.845359	0.000895591
	gene28142	Cationic peroxidase 1, Precursor (putative)	2.7665	0.0499273		gene07088	Major allergen Pru av 1	1.45339	0.0252573																	gene15859	Probable alpha,alpha-trehalose-phosphate synthase	1.07293	0.0257439							gene05105	Peroxidase 29	2.50713	0.0114421		gene11132	40S ribosomal S5-1	-0.905295	0.0216119		gene11089	60S ribosomal protein L19-1 (similar to)	-0.841168	0.0419172
						gene17631	BTB POZ domain-containing At5g48800	1.46173	0.0256493																	gene16378	Inositol-3-phosphate synthase	1.126	0.0494594							gene22077	Acetyl- carboxylase 1/ Biotin carboxylase (probable)	2.72794	0.00178613		gene20620	60S ribosomal L31	-0.901079	0.0107585		gene18780	60S ribosomal protein L35a-1 (putative)	-0.835086	0.0405825
						gene05123	Major allergen Pru ar 1	1.61566	0.019216																	gene32087	Endoglucanase 6	1.17531	0.00844224							gene28142	Cationic peroxidase 1	3.1609	0.0129823		gene05155	60S ribosomal L29-1	-0.89843	0.0287978		gene04306	40S ribosomal protein S19-1 (putative)	-0.83363	0.0481724
						gene06044	UV repair defective 3	1.69034	0.0157832																	gene20547	Cellulose synthase E1	1.20087	0.00850225												gene30879	Probable ubiquitin-conjugating enzyme E2 37	-0.894066	0.00273273		gene21330	40S ribosomal protein S26-1 (similar to)	-0.827621	0.0221557
						gene07065	Major allergen Pru ar 1	1.76285	0.00854801																	gene21072	3)-beta-glucan endohydrolase	1.21039	0.000580222												gene02142	40S ribosomal S16	-0.892824	0.0290679		gene15180	50S ribosomal protein L31, chloroplastic, Precursor (putative)	-0.803128	0.043722
						gene05122	Major allergen Pru av 1	2.15608	0.00302818																	gene13718	Probable xyloglucan endotransglucosylase hydrolase 30	1.31378	0.0281221												gene26004	60S ribosomal L34	-0.882572	0.0469262		gene21679	Probable serine/threonine-protein kinase GCN2 (putative)	1.08647	0.00924721
						gene07064	Major allergen Pru av 1	2.52369	0.00352985																	gene21638	Exopolygalacturonase	1.52143	0.0361534												gene08780	60S ribosomal L37-3	-0.882342	0.0429545		gene10999	Histone-lysine N-methyltransferase trr (probable)	1.08852	0.0318728
						gene28142	Cationic peroxidase 1	2.7665	0.0499273																	gene13147	Acidic endochitinase	1.72998	0.0217107												gene30245	60S acidic ribosomal P2	-0.880773	0.0399942
																										gene24860	Alpha,alpha-trehalose-phosphate synthase	1.99514	0.0206132												gene22275	60S ribosomal L27a-3	-0.877733	0.0335888
																										gene15030	Chitotriosidase-1	3.53328	0.0100359												gene17157	60S ribosomal L8-3	-0.874976	0.0301145
																										gene04896	Beta-1,3-galactosyltransferase pvg3	4.0899	0.014599												gene11461	60S ribosomal L5	-0.867445	0.0345019
																																									gene30528	40S ribosomal S11-1	-0.861943	0.0334698
																																									gene23137	Homolog 2	-0.85663	0.0232405
																																									gene15170	Proteasome subunit alpha type-1-B	-0.855507	0.00407255
																																									gene08275	60S ribosomal L14-2	-0.851621	0.0461476
																																									gene09141	SUMO-conjugating enzyme SCE1	-0.84584	0.00292639
																																									gene08904	50S ribosomal protein L5, chloroplastic (similar to)	-0.845359	0.000895591
																																									gene11089	60S ribosomal L19-3	-0.841168	0.0419172
																																									gene18780	60S ribosomal L35a-3	-0.835086	0.0405825
																																									gene04306	40S ribosomal S19-1	-0.83363	0.0481724
																																									gene21330	40S ribosomal S26-3	-0.827621	0.0221557
																																									gene15180	50S ribosomal chloroplastic	-0.803128	0.043722
																																									gene22981	ATP binding	0.800032	0.0370258
																																									gene13121	Probable inactive receptor kinase	0.8145	0.00385654
																																									gene13920	Dynamin-related 4C	0.819978	0.0480336
																																									gene24460	Probable inactive leucine-rich repeat receptor kinase	0.833815	0.0393694
																																									gene24114	Probable serine threonine- kinase NAK	0.835729	0.0264463
																																									gene26503	Serine threonine- kinase At5g01020	0.838946	0.0350579
																																									gene11048	UDP-glucose:glyco glucosyltransferase	0.843314	0.00400265
																																									gene27507	1-phosphatidylinositol-3-phosphate 5-kinase FAB1D	0.908649	0.0285885
																																									gene24158	Cyclin-dependent kinase E-1	0.913761	0.0190077
																																									gene18025	Ubiquitin-specific protease	0.916253	0.0137634
																																									gene34321	Wall-associated receptor kinase-like 9	0.925648	0.0164484
																																									gene20954	Thaumatin 1	0.958094	0.0285034
																																									gene02393	Probable ubiquitin-conjugating enzyme E2 24	1.00642	0.0273175
																																									gene16334	Probable LRR receptor-like serine threonine- kinase	1.01251	0.017523
																																									gene11302	Receptor kinase HSL1	1.03923	0.0412421
																																									gene21679	Serine threonine- kinase GCN2	1.08647	0.00924721
																																									gene10999	Histone-lysine N- H3 lysine-4 specific	1.08852	0.0318728
																																									gene19272	Ubiquitin-conjugating enzyme E2 5	1.11208	0.0426968
																																									gene11969	Osmotic stress abscisic acid-activated kinase 8	1.12888	0.0464146
																																									gene24687	Receptor kinase HAIKU2	1.13904	0.0173997
																																									gene05696	Receptor kinase	1.19509	0.0303102
																																									gene26562	E3 ubiquitin- ligase UPL2	1.21001	0.0351689
																																									gene13896	Phototropin-1	1.21444	0.0106636
																																									gene24085	Mitogen-activated kinase kinase kinase YODA	1.26323	0.0416365
																																									gene30351	Transcription initiation factor TFIID subunit 1	1.27207	0.0471582
																																									gene27368	Probable serine threonine- kinase qkgA	1.28538	0.0191127
																																									gene30648	G-type lectin S-receptor-like serine threonine- kinase RKS1	1.3002	0.00167708
																																									gene11311	Receptor kinase HSL1	1.31523	0.0425129
																																									gene12641	Abnormal leaf shape 2	1.40473	0.00689525
																																									gene29225	Probable serine threonine- kinase	1.50912	0.000763163
																																									gene04247	Receptor kinase FERONIA	1.65822	0.0338014
																																									gene26593	Kinase chloroplastic	1.70049	0.0333395
																																									gene01965	S-locus-specific glyco S13	1.74056	0.00980742
																																									gene22908	Leucine-rich repeat receptor kinase At2g19210	1.7486	0.0299892
																																									gene25036	S-locus-specific glyco S13	1.79151	0.0217921
																																									gene30753	G-type lectin S-receptor-like serine threonine- kinase	1.8111	0.0421542
																																									gene12609	(-)-germacrene D synthase	1.85148	0.013378
																																									gene20590	E3 ubiquitin- ligase UPL1	1.86682	0.0101969
																																									gene17154	Cysteine-rich receptor kinase 10	1.87416	0.0360944
																																									gene30638	Receptor-like serine threonine- kinase SD1-8	2.14558	0.00791385
																																									gene18599	Probably inactive receptor kinase At2g46850	2.16839	0.0172796
																																									gene30004	MDIS1-interacting receptor like kinase 2	2.26196	0.0149465
																																									gene28451	Cysteine-rich receptor kinase 42	2.28856	0.00808416
																																									gene18254	Calcium-dependent kinase 2	2.34757	0.0316548
																																									gene24962	L-type lectin-domain containing receptor kinase	2.37282	0.0162174
																																									gene24440	Disease resistance At4g27190	2.43891	0.00430802
																																									gene12512	Receptor kinase At1g72540	2.71386	0.0322353
																																									gene12633	Receptor kinase HSL1	3.21419	0.00731241
																																									gene22871	U-box domain-containing 15 ame	3.31096	0.00590374
																																									gene07736	CRINKLY 4 related 4	3.66746	0.00877789

## Sheet: S. Table 8
	Supplemental Table 8. List of diffentially expressed F. vesca white and red fruits genes encoding for membrane bounded receptor kinases, nucleotide binding site leucine rich repeat, and heat-shock proteins at 24 hpi. hpi, hour post inoculation.
	Gene ID	Functional annotation	Fold change (log2)		P-value
			White	Red	White	Red
	Membrane bounded receptor kinases
	gene34339	Wall-associated receptor kinase-like 4, Precursor	2.107		0.0100423
	gene24962	Lectin-domain containing receptor kinase A4.3	1.257	2.373	0.0407832	0.0162174
	gene02384	Lectin-domain containing receptor kinase A4.3	0.891		0.0104037
	gene20593	Lectin-domain containing receptor kinase A4.1	-1.197		0.00533164
	gene06308	Serine/threonine-protein kinase BRI1-like 2	1.677		0.0100125
	gene22229	Protein STRUBBELIG-RECEPTOR FAMILY 2	1.541	2.899	0.0140123	0.000937193
	gene05645	Probable inactive receptor kinase At1g27190	1.033		0.00261709
	gene01195	Receptor-like protein kinase BRI1-like 3	0.844		0.0111993
	gene19039	Serine/threonine-protein kinase BRI1-like 2	-1.138		0.0380718
	gene16992	Somatic embryogenesis receptor kinase 1 (AtSERK1)	-2.562		0.0170907
	gene26498	BRASSINOSTEROID INSENSITIVE 1-associated receptor kinase 1 (BRI1-associated receptor kinase 1)	-2.789		0.00772817
	gene04905	Probable LRR receptor-like serine/threonine-protein kinase At4g36180	1.305		0.0318523
	gene28630	Probable LRR receptor-like serine/threonine-protein kinase At1g07650	0.878		0.00862846
	gene13366	Probable LRR receptor-like serine/threonine-protein kinase RFK1	0.824		0.00555764
	gene01491	Probable LRR receptor-like serine/threonine-protein kinase At4g26540	0.805		0.0257268
	gene19103	LRR receptor-like serine/threonine-protein kinase GSO1	-0.915		0.0345148
	gene02191	Probable LRR receptor-like serine/threonine-protein kinase At4g31250, Precursor/ RustresistancekinaseLr10	-1.06		0.0417465
	gene13584	Probable LRR receptor-like serine/threonine-protein kinase At1g06840	-1.24		0.0368586
	gene28051	Probable LRR receptor-like serine/threonine-protein kinase At1g56130	-1.396		0.0479347
	gene15597	Probable LRR receptor-like serine/threonine-protein kinase At4g36180	-1.943		0.0455428
	gene19894	LRR receptor-like serine/threonine-protein kinase ERECTA	-2.153		0.0414872
	gene09151	Putative receptor protein kinase ZmPK1	1.63		0.0228528
	gene32207	Cysteine-rich receptor-like protein kinase 42 (Cysteine-rich RLK42)	1.129		0.0478361
	gene02011	Cysteine-rich receptor-like protein kinase 10 (Cysteine-rich RLK10)	-1.001		0.00991611
	gene21516	Cysteine-rich receptor-like protein kinase 28 (Cysteine-rich RLK28)	-2.281		0.0127442
	gene17154	Cysteine-rich receptor-like protein kinase 29 (Cysteine-rich RLK29)	-4.427	1.874	0.000185215	0.0360944
	gene28451	Cysteine-rich receptor-like protein kinase 42 (Cysteine-rich RLK42)		2.289		0.00808416
	gene01965	Cysteine-rich receptor-like protein kinase 11 (Cysteine-rich RLK11)		1.741		0.00980742
	gene34321	Wall-associated receptor kinase-like 9, Precursor		0.926		0.0164484
	gene15062	Wall-associated receptor kinase-like 14, Precursor		0.84		0.0172468
	gene05696	Receptor-like protein kinase		1.195		0.0303102
	gene04903	LRR receptor-like protein kinase PEPR2 (PEP1 receptor 2)		-0.956		0.0306444
	gene12633	Receptor-like protein kinase HSL1		3.214		0.00731241
	gene35049	Probably inactive leucine-rich repeat receptor-like protein kinase At2g25790		2.822		0.0421339
	gene19246	Probable receptor-like protein kinase At5g24010		2.406		0.0412999
	gene34533	Tyrosine-sulfated glycopeptide receptor 1		2.356		0.0255138
	gene18599	Probably inactive receptor-like protein kinase At2g46850		2.168		0.0172796
	gene34051	Tyrosine-sulfated glycopeptide receptor 1		1.904		0.0336
	gene22908	Probable receptor-like protein kinase At1g51890		1.749		0.0299892
	gene22908	Probable receptor-like protein kinase At1g51890		1.749		0.0299892
	gene34056	Tyrosine-sulfated glycopeptide receptor 1		1.446		0.04457
	gene11311	Receptor-like protein kinase HSL1		1.315		0.0425129
	gene24687	Receptor-like protein kinase HAIKU2		1.139		0.0173997
	gene11302	Receptor-like protein kinase HSL1		1.039		0.0412421
	gene13121	Probable inactive receptor kinase At4g23740		0.815		0.00385654
	gene30004	Probable LRR receptor-like serine/threonine-protein kinase At4g08850		2.262		0.0149465
	gene19299	LRR receptor-like serine/threonine-protein kinase GSO1		1.493		0.0406994
	gene30033	Probable LRR receptor-like serine/threonine-protein kinase At1g56130		1.383		0.0500116
	gene21426	LRR receptor-like serine/threonine-protein kinase GSO2		1.186		0.02004
	gene13479	LRR receptor-like serine/threonine-protein kinase GSO1		1.02		0.0316028
	gene16334	Probable LRR receptor-like serine/threonine-protein kinase At1g56130		1.013		0.017523
	gene13771	LRR receptor-like serine/threonine-protein kinase GSO1		0.931		0.0494874
	gene24460	Probable LRR receptor-like serine/threonine-protein kinase At1g14390		0.834		0.0393694
	gene21424	LRR receptor-like serine/threonine-protein kinase FLS2		-1.145		0.00753685
	gene04247	Receptor-like protein kinase FERONIA		1.658		0.0338014
	gene20954	Receptor-like protein kinase At3g21340, Precursor (similar to)		0.958		0.0285034
	gene19499	Protein STRUBBELIG-RECEPTOR FAMILY 8, Precursor (similar to)	1.453		0.0417667
	gene25908	Probable LRR receptor-like serine/threonine-protein kinase At1g53420, Precursor	-2.907		0.0109292
	gene23251	Probable LRR receptor-like serine/threonine-protein kinase At1g53420, Precursor	1.034		0.00147784
	gene19263	Probable leucine-rich repeat receptor-like protein kinase At5g49770, Precursor	1.372		0.0318498
	gene00522	Polygalacturonase inhibitor (PGIP), Precursor (putative)	1.797	1.746	0.0474824	0.00556833
	Intracellular recceptor kinases and calcium-based signalings
	gene30638	Putative serine/threonine-protein kinase receptor (SRK), Precursor (probable)		2.146		0.00791385
	gene30648	Putative serine/threonine-protein kinase receptor (SRK), Precursor (probable)		1.3		0.00167708
	gene30753	Putative serine/threonine-protein kinase receptor (SRK), Precursor (probable)		1.811		0.0421542
	gene18254	Calcium-dependent protein kinase 1 (AtCDPK 1) (similar to)		2.348		0.0316548
	gene17503	Calmodulin-like protein 3 (putative)		1.887		0.00469266
	gene12692	Mitogen-activated protein kinase kinase 2 (MAP kinase kinase 2) (similar to)	-0.937		0.0019042
	gene05705	Mitogen-activated protein kinase kinase 5 (MAP kinase kinase 5) (similar to)	0.877		0.000606529
	gene24085	Mitogen-activated protein kinase kinase kinase ANP1 (probable)	1.757	1.263	0.0232592	0.0416365
	gene14811	Mitogen-activated protein kinase kinase 4 (MAP kinase kinase 4) (probable)		2.266		0.0364303
	gene30979	Mitogen-activated protein kinase kinase kinase 1 (MEK kinase 1) (probable)	-0.961		0.0090575
	gene13920	Mitogen-activated protein kinase kinase kinase A (MEK kinase 1) (probable)		0.82		0.0480336
	gene24440	Mitogen-activated protein kinase kinase kinase 1 (MAP kinase kinase kinase 1) (similar to)		2.439		0.00430802
	gene09448	Mitogen-activated protein kinase kinase kinase 7-interacting protein 3 (probable)	0.857		0.00322861
	Nucleotide binding site leucine rich repeat (NBS-LRR)
	gene03058	TMV resistance protein N	-2.605	2.401	0.0252996	0.0376995
	gene24787	TMV resistance protein N	-2.465		0.0196224
	gene02401	TMV resistance protein N	-2.409		0.020556
	gene20655	TMV resistance protein N	-2.12		0.0338199
	gene01294	TMV resistance protein N	-1.981		0.0342469
	gene31994	TMV resistance protein N	-1.965	1.843	0.00193752	0.00571147
	gene13372	TMV resistance protein N	-1.643		0.00915449
	gene16053	TMV resistance protein N	-1.167		0.00403767
	gene16534	TMV resistance protein N	-1.009	1.132	0.0106996	0.0256555
	gene04856	TMV resistance protein N	-0.9		0.0331656
	gene14188	TMV resistance protein N		2.334		0.00785855
	gene23846	TMV resistance protein N		1.033		0.0195143
	gene18674	TMV resistance protein N		-1.401		0.0463406
	gene24449	TMV resistance protein N		1.077		0.0442781
	gene17137	TMV resistance protein N		0.874		0.0297272
	gene09920	TMV resistance protein N		2.035		0.0376822
	gene24401	TMV resistance protein N		1.958		0.024774
	gene29744	TMV resistance protein N		1.452		0.0133372
	gene08354	TMV resistance protein N		1.173		0.0358742
	gene14587	TMV resistance protein N		0.877		0.0490897
	gene24813	TMV resistance protein N		1.01		0.0485082
	gene05732	Probable disease resistance protein At5g66900	-1.503		0.00908911
	gene26650	Putative disease resistance protein At3g14460	-1.335	1.478	0.0162552	0.0300869
	gene16734	Putative disease resistance protein RGA1	-1.291		0.0277134
	gene28332	Probable disease resistance RPP8-like protein 2	-1.241		0.0263839
	gene35140	Putative disease resistance RPP13-like protein 1	-1.197		0.0390274
	gene04409	Putative disease resistance protein RGA3	-1.019		0.00258033
	gene06560	Putative disease resistance protein At4g10780	-0.974		0.00906
	gene34124	Putative disease resistance RPP13-like protein 1	-0.942	0.972	0.00566406	0.0254736
	gene04301	Putative disease resistance protein RGA3	-0.937		0.00893036
	gene01229	Probable disease resistance protein At5g66900	-0.923	0.913	0.0112413	0.025549
	gene13684	Disease resistance protein RPM1	0.945	0.918	0.049179	0.0448286
	gene13057	Disease resistance response protein 206	1.838	1.537	3.86256e-05	0.000250454
	gene32301	Probable disease resistance protein At4g27220	2.784	1.472	0.000667213	0.0285007
	gene25628	Putative disease resistance protein At3g14460		2.307		0.0206211
	gene34116	Putative disease resistance RPP13-like protein 1		2.074		0.000850838
	gene34123	Putative disease resistance RPP13-like protein 1		1.945		0.0227891
	gene24089	Probable disease resistance protein At5g66900		1.816		0.0335592
	gene18440	Putative disease resistance protein RGA3		1.771		0.0130195
	gene24102	Probable disease resistance protein At5g66910		1.428		0.00102606
	gene04541	Putative disease resistance protein At3g14460		1.19		0.035814
	gene25023	Putative disease resistance RPP13-like protein 1		1.143		0.0266598
	gene33936	Disease resistance protein At4g27190		0.944		0.0491584
	gene26511	Putative disease resistance RPP13-like protein 1		0.913		0.0442405
	gene23388	Putative disease resistance protein At5g47280		-2.041		0.0289083
	Heat-shock proteins
	gene09177	17.5 kDa class I heat shock protein (probable)	-0.877	-1.084	0.0166711	0.00544717
	gene07767	17.5 kDa class I heat shock protein (putative)		3.612		0.00986767
	gene20877	17.8 kDa class I heat shock protein (putative)	2.417	4.463	0.0314668	0.00310703
	gene15418	17.9 kDa class II heat shock protein (putative)	1.83	1.805	0.0115193	0.0142917
	gene20885	18.1 kDa class I heat shock protein (AtHsp18.1) (putative)	1.138	1.99	0.0467501	0.0018208
	gene07901	18.1 kDa class I heat shock protein (putative)	2.018		0.00813658
	gene14172	18.2 kDa class I heat shock protein (similar to)		-1.17		0.0157506
	gene07771	18.5 kDa class I heat shock protein (putative)		5.061		0.020329
	gene25948	22.0 kDa heat shock protein (AtHsp22.0), Precursor (probable)	-1.437		0.0304934
	gene21218	23.6 kDa heat shock protein, mitochondrial (AtHsp23.6), Precursor (probable)		-2.314		0.000544404
	gene08959	23.6 kDa heat shock protein, mitochondrial (AtHsp23.6), Precursor (probable)	1.468		0.0162187
	gene17995	Activator of 90 kDa heat shock protein ATPase homolog (probable)		-1.442		0.002542
	gene29751	DnaJ homolog subfamily B member 1 (Heat shock protein 40) (probable)		-1.036		0.0118255
	gene10105	Heat shock 70 kDa protein (putative)	1.425		0.00524413
	gene06706	Heat shock 70 kDa protein, mitochondrial, Precursor (similar to)		2.699		0.0177482
	gene18240	Heat shock cognate 70 kDa protein 1 (Hsc70.1) (similar to)		-1.458		0.0139243
	gene03043	Heat shock cognate 70 kDa protein 2 (Hsc70.2) (similar to)	1.429	-1.279	0.00846798	0.0160995
	gene26629	Heat shock cognate 70 kDa protein 2 (putative)	1.245		0.0448937
	gene26540	Heat shock cognate 70 kDa protein 2 (similar to)		-1.266		0.0365495
	gene01495	Heat shock protein 81-2 (HSP81-2) (putative)		-1.117		0.0218284
	gene04521	Heat shock protein 83 (probable)		-1.318		0.00028448
	gene13191	Heat shock protein 83 (putative)		-1.636		0.0068432
	gene13189	Heat shock protein 83 (similar to)	1.534	-2.134	0.000311213	7.07659e-06
	gene04287	Heat shock protein DDB_G0288861 (probable)		1.008		0.0308609
	gene32258	Heat shock protein STI (GmSTI) (similar to)	0.855	-1.268	0.0159878	0.0015251

## Sheet: S. Table 9
	Supplemental Table 9. List of diffentially expressed F. vesca white and red fruits genes encoding for transcription factors at 24 hpi. hpi, hour post inoculation.
	Gene id	Functional annotation	Fold change (log2)		P-value
			White	Red	White	Red
	gene15119	Zinc finger protein MAGPIE (similar to)	1.153		0.00795663
	gene27383	Zinc finger protein CONSTANS-LIKE 5 (probable)	1.109		0.00202037
	gene03742	Zinc finger protein CONSTANS-LIKE 16 (probable)	-2.803		0.0105118
	gene30740	Zinc finger protein CONSTANS-LIKE 10 (probable)	-2.786		0.00885205
	gene14810	Zinc finger CCCH domain-containing protein 53 (OsC3H53) (probable)	-2.34		0.0308419
	gene18108	Zinc finger CCCH domain-containing protein 21 (AtC3H21) (similar to)	-1.074		0.0293089
	gene08175	Zinc finger and SCAN domain-containing protein 29 (probable)	-1.03		0.016304
	gene16196	U-box domain-containing protein 26 (probable)	1.293		0.0303772
	gene10484	Two-component response regulator-like APRR2 (probable)	-0.809	1.047	0.0227162	0.0174914
	gene03235	Two-component response regulator ARR2 (probable)	-1.305		0.0366821
	gene30350	Transcription initiation factor TFIID subunit 1-A (AtTAF1a) (probable)	0.999		0.0282324
	gene11979	Transcription factor TGA3 (AtbZIP22) (similar to)	-1.007		0.0157535
	gene32629	Transcription factor RF2b (similar to)	1.259		0.0146827
	gene08006	Transcription factor MYB98 (AtMYB98) (similar to)	2.508		0.024078
	gene23830	Transcription factor HEC1 (bHLH 88) (similar to)	1.847		0.039032
	gene24577	Transcription factor bHLH95 (bHLH 95) (probable)	1.203	1.606	0.00481289	0.00143407
	gene18542	Transcription factor bHLH53 (bHLH 53) (probable)	1.149		0.0325869
	gene05064	Transcription factor bHLH148 (bHLH 148) (probable)	0.963		0.00124096
	gene22490	Transcription factor bHLH128 (bHLH 128) (probable)	-0.969		0.04961
	gene19128	Transcription elongation factor B polypeptide 3 (EloA) (probable)	-1.078	1.197	0.0406247	0.0323284
	gene13212	Scarecrow-like protein 8 (AtSCL8) (similar to)	1.435		0.00293737
	gene03365	Ras GTPase-activating protein-binding protein 1 (probable)	0.878		0.00421548
	gene13743	Putative Myb family transcription factor At1g14600 (probable)	0.991		0.0298674
	gene01197	Probable WRKY transcription factor 2 (putative)	0.839		0.0423327
	gene18470	Probable transcriptional regulator RABBIT EARS (similar to)	2.395		0.0356324
	gene22584	Nuclear transcription factor Y subunit C-9 (AtNF-YC-9) (putative)	-1.715		0.0236126
	gene23541	Nuclear transcription factor Y subunit B-2 (AtNF-YB-2) (similar to)	-3.529		0.00566248
	gene22095	NAC domain-containing protein 68 (ONAC068) (probable)	-1.92		0.0451541
	gene22092	NAC domain-containing protein 2 (ANAC002) (probable)	-1.07		0.00589474
	gene01997	Myb-related protein Myb4 (similar to)	-3.439		0.00820484
	gene14072	Myb-like protein X (probable)	-2.581		0.0272287
	gene18104	Myb-like protein G (probable)	2.048		0.0457941
	gene19866	Myb family transcription factor APL (AtAPL) (similar to)	-0.818		0.00103362
	gene19709	Myb family transcription factor APL (AtAPL) (putative)	-0.871		0.0364411
	gene03554	mTERF domain-containing protein 1, mitochondrial, Precursor (probable)	-1.627		0.0021002
	gene06301	MADS-box transcription factor 17 (probable)	-1.621		0.040137
	gene28394	Homeobox-leucine zipper protein HAT5 (HD-ZIP protein 5) (probable)	-1.448		0.0213184
	gene08853	Homeobox-leucine zipper protein HAT4 (HD-ZIP protein 4) (similar to)	-1.059		0.022814
	gene24887	Homeobox-leucine zipper protein ATHB-40 (probable)	0.846		0.0135081
	gene28942	Homeobox-leucine zipper protein ATHB-14 (similar to)	-0.847		0.0478252
	gene12765	Homeobox-leucine zipper protein ATHB-12 (probable)	-1.007		0.0111436
	gene19196	Histone-lysine N-methyltransferase ATX3 (TRX-homolog protein 3) (similar to)	-1.112	1.506	0.0163718	0.00330048
	gene13301	Heat stress transcription factor B-2a (AtHsfB2a) (probable)	0.908	-1.035	0.0474537	0.0181668
	gene08000	Gastrula zinc finger protein XlCGF26.1 (probable)	1.317		0.0155283
	gene00377	Ethylene-responsive transcription factor WRI1 (similar to)	1.402		0.0422839
	gene32084	Ethylene-responsive transcription factor ERF061 (probable)	1.914		0.00146812
	gene17698	Ethylene-responsive transcription factor ERF053 (probable)	2.225		0.0153928
	gene32187	Dof zinc finger protein DOF5.6 (AtDOF5.6) (probable)	-4.354		0.00268687
	gene26135	Dof zinc finger protein DOF5.4 (AtDOF5.4) (similar to)	1.275		0.00252682
	gene12818	Dof zinc finger protein DOF4.6 (AtDOF4.6) (probable)	-1.186		0.00286671
	gene26022	Dof zinc finger protein DOF3.3 (AtDOF3.3) (probable)	1.458		0.0112762
	gene26118	Developmental protein SEPALLATA 1 (probable)	-2.051		0.0202804
	gene05160	Calmodulin-binding transcription activator 5 (EICBP.f) (similar to)	-1.297	1.597	0.0173928	0.0192214
	gene24434	Bromodomain-containing protein C1450.02 (probable)	0.921		0.0487857
	gene20865	BEL1-like homeodomain protein 9 (BEL1-like protein 9) (probable)	1.039		0.00954522
	gene19367	B3 domain-containing protein REM9 (probable)	0.897		0.0406696
	gene26830	Auxin-responsive protein IAA8 (similar to)	-1.016		0.00690035
	gene16569	Auxin-responsive protein IAA4 (putative)	-5.367		0.00285499
	gene16571	Auxin-responsive protein IAA16 (similar to)	-1.886		0.0216732
	gene27891	Auxin-responsive protein IAA13 (similar to)	-1.718		0.0181874
	gene23280	Auxin response factor 18 (putative)	-3.213		0.00327446
	gene32520	AT-rich interactive domain-containing protein 4A (RBBP-1) (probable)	0.904		0.00648907
	gene14058	Agamous-like MADS-box protein AGL62 (probable)	3.16		0.00758583
	gene12658	Putative transcription factor bHLH041 (bHLH 41) (probable)		2.766		0.0314368
	gene17430	Transcription factor bHLH78 (bHLH 78) (probable)		1.795		0.00392866
	gene20347	Heat stress transcription factor A-6b (AtHsfA6b) (probable)		1.663		0.0277446
	gene04840	Chromodomain-helicase-DNA-binding protein 1-like (probable)		1.618		0.0149192
	gene20754	GATA transcription factor 14 (similar to)		1.548		0.043842
	gene17765	Zinc finger protein NUTCRACKER (putative)		1.449		0.0348957
	gene08194	Auxin-induced protein AUX28 (putative)		1.446		0.015253
	gene17608	E1A-binding protein p400 (mDomino) (probable)		1.368		0.013066
	gene14851	Chromodomain-helicase-DNA-binding protein 2 (CHD-2) (probable)		1.306		0.0115993
	gene12224	Auxin response factor 19 (similar to)		1.29		0.00379117
	gene30351	Transcription initiation factor TFIID subunit 1-A (AtTAF1a) (similar to)		1.272		0.0471582
	gene20484	Histone-lysine N-methyltransferase, H3 lysine-9 specific SUVH6 (Su(var)3-9 homolog protein 6) (probable)		1.215		0.00853777
	gene30394	Auxin response factor 6 (similar to)		1.196		0.00105867
	gene10955	Zinc finger CCCH domain-containing protein 7 (AtC3H7) (similar to)		1.188		0.0488749
	gene14276	Doublesex- and mab-3-related transcription factor A1 (probable)		1.12		0.0070808
	gene22505	Zinc finger protein MAGPIE (similar to)		1.115		0.0115197
	gene02234	Auxin response factor 17 (probable)		1.107		0.041098
	gene06705	Transcription regulatory protein SNF2 (probable)		1.091		0.0469424
	gene10999	Histone-lysine N-methyltransferase trr (probable)		1.089		0.0318728
	gene31817	Homeobox protein BEL1 homolog (probable)		1.015		0.026078
	gene27007	Zinc finger CCCH domain-containing protein 30 (AtC3H30) (putative)		0.995		0.00477997
	gene16584	Probable WRKY transcription factor 74		0.983		0.0464086
	gene24904	Probable WRKY transcription factor 28		0.966		0.0357385
	gene00379	Protein ETHYLENE INSENSITIVE 3 (similar to)		0.954		0.0265584
	gene03712	Transcription factor MYB21 (AtMYB21) (similar to)		0.924		0.0170685
	gene14415	Zinc finger CCCH domain-containing protein 53 (OsC3H53) (probable)		0.897		0.0288508
	gene05506	Histone acetyltransferase HAC1 (similar to)		0.878		0.0106416
	gene24358	Chromodomain-helicase-DNA-binding protein Mi-2 homolog (dMi-2) (probable)		0.866		0.0218752
	gene22028	Histone-lysine N-methyltransferase ATX3 (TRX-homolog protein 3) (similar to)		-0.802		0.00764663
	gene08977	Transcription factor BTF3 homolog 4 (similar to)		-0.821		0.0436737
	gene28185	Zinc finger HIT domain-containing protein 1 homolog (probable)		-0.84		0.0376255
	gene23873	Ethylene-responsive transcription factor ERF010 (similar to)		-0.986		0.0115097
	gene24027	Transcription factor MYB44 (AtMYB44) (probable)		-1.244		0.00562087
	gene16806	Zinc finger protein 706 (probable)		-1.305		0.00449445
	gene09614	Transcription factor TCP15 (similar to)		-1.388		0.0025045
	gene13351	Transcription factor TCP19 (probable)		-1.602		0.0452195
	gene31056	Axial regulator YABBY 5 (similar to)		-1.746		0.0334347
	gene18383	Dof zinc finger protein DOF5.1 (AtDOF5.1) (similar to)		-2.919		0.0237692

## Sheet: S. Table 10
	Supplemental Table 10. List of diffentially expressed F. vesca white and red fruits genes encoding for pathogenesis-related proteins at 24 hpi. hpi, hour post inoculation.
	Gene id	Functional annotation	Fold change (log2)		P-value
			White	Red	White	Red
	gene21072	Glucan endo-1,3-beta-glucosidase 8 ((1->3)-beta-glucanase 8)	1.21		0.000580222
	gene29858	Glucan endo-1,3-beta-glucosidase 6 ((1->3)-beta-glucanase 6)	0.881		0.0457707
	gene22713	Glucan endo-1,3-beta-glucosidase-like protein	-1.675		0.0372812
	gene24890	Glucan endo-1,3-beta-glucosidase 1 ((1->3)-beta-glucanase 1)	-1.72		0.0400768
	gene27049	Glucan endo-1,3-beta-glucosidase 6 ((1->3)-beta-glucanase 6)		1.051		0.0427775
	gene30565	Pathogenesis-related protein PR-4B		1.927		0.0219763
	gene15030	Chitotriosidase-1/ Chitinase 1	3.533		0.0100359
	gene32423	Osmotin-like protein OSM34	1.219		0.0143361
	gene14601	Thaumatin-like protein 1	1.286		0.00384354
	gene00522	Polygalacturonase inhibitor (PGIP)	1.797	1.746	0.0474824	0.00556833
	gene32561	Glu S.griseus protease inhibitor	-1.31		0.034837
	gene00949	Bowman-Birk type proteinase inhibitor B-III	-3.515		0.0117685
	gene09377	Chitinase 3		1.939		0.00381984
	gene10758	Peroxidase/ Peroxidase 20	-1.267		0.0222907
	gene28142	Peroxidase/ Cationic peroxidase 1	2.766	3.161	0.0499273	0.0129823
	gene00894	Peroxidase/ Lignin-forming anionic peroxidase		2.322		0.0181593
	gene07064	Major allergen Pru ar 1 (putative)/Pathogenesis-related protein Bet v	2.524	1.531	0.00352985	0.0152095
	gene05122	Major allergen Pru ar 1 (putative)/Pathogenesis-related protein Bet v	2.156		0.00302818
	gene07065	Major allergen Pru ar 1 (putative)/Pathogenesis-related protein Bet v	1.763		0.00854801
	gene05123	Major allergen Pru ar 1 (putative)/Pathogenesis-related protein Bet v	1.616		0.019216
	gene07088	Major allergen Pru ar 1 (putative)/Pathogenesis-related protein Bet v	1.453		0.0252573
	gene07080	Major allergen Pru ar 1 (putative)/Pathogenesis-related protein Bet v	-1.484		0.0395312
	gene00814	Defensin-like protein 232 (SCR-like protein 23)	-1.055	-1.003	0.00302813	0.00222776
	gene16092	Non-specific lipid-transfer protein-like protein	1.362		0.00516562
	gene20408	Non-specific lipid-transfer protein-like protein	-1.358		0.0167459
	gene09098	Non-specific lipid-transfer protein-like	-1.555		0.0447909
	gene20871	Probable non-specific lipid-transfer protein 2 (LTP 2)	-2.311		0.00702142
	gene00606	Non-specific lipid-transfer protein 4.1 (LTP 4.1)		-2.64		0.0320027

[truncated: 1 more sheets: S. Table 11]
